# Supplementary material for: Genome-Wide Analysis of Genes Encoding Methionine-Rich Proteins in Arabidopsis and Soybean Suggesting Their Roles in the Adaptation of Plants to Abiotic Stress
Source: Int J Genomics. 2016 Aug 18;2016:5427062. doi: 10.1155/2016/5427062 (PMC5007304; doi:10.1155/2016/5427062)
Supplement: Supplementary file 1 — Met-rich proteins encoded by Arabidopsis (Table S1) and soybean (Table S2) genomes and their transcriptional responses to stress. [file 5427062.f1.xlsx]

## Sheet: Table S1 (AtMRPs)
Table S1. Met-rich proteins encoded by Arabidopsis genome and their transcriptional responses to stress
Locus IDs	Transcripts	Met		a.a. length	Drought vs untreated1		Salinity vs untreated2		Gene descriptions	amino acid sequences		WoLF PSORT			CELLO			abiotic-related cis-elements
		(%)	(#)		Fold change3	Corrected p-value	Fold change3	Corrected p-value			ChloroP	Chloro	Cyto	MITO	Chloro	Mito	Transcript IDs	ABRE (C/G/T)ACGTG(G/T)(A/C)	MYBR (A/C)ACC(A/T)A(A/C)C	MYCR (CACATG)
AT1G01160	AT1G01160.1	7.22	14	195	1.79863	0.0163199	-1.0905	0.0268224	GIF2 (GRF1-INTERACTING FACTOR 2) [AT1G01160.1]	MQQQQSPQMFPMVPSIPPANNITTEQIQKYLDENKKLIMAIMENQNLGKLAECAQYQALLQKNLMYLAAIADAQPPPPTPGPSPSTAVAAQMATPHSGMQPPSYFMQHPQASPAGIFAPRGPLQFGSPLQFQDPQQQQQIHQQAMQGHMGIRPMGMTNNGMQHAMQQPETGLGGNVGLRGGKQDGADGQGKDDGK							AT1G01160
AT1G06960	AT1G06960.3	6.03	12	200		-		-	small nuclear ribonucleoprotein U2B, putative / spliceosomal protein, putative | chr1:2135852-2137702 FORWARD	MRRSRKKFGRLLDVVALKTPKLRGQAWVVFTEVTAASNAVRQMQNFPFYDKPMRIQYAKSKSDYVTKAEGSFVPKEKKMKQEEKVERKRHAEETQQPSMPNGATTQNGMPVPPFQPSGQDTMPPNNILFIHNLPIETNSMMLQLLFEQYPGFKEIRMIEAKPGIAFVEYEDDVQSSMAMQALQGFKITPQNPMVVSFAKK		Y					AT1G06960
AT1G10586	AT1G10586.2	6.06	8	133		-		-	transcription regulator | chr1:3496928-3499439 REVERSE	MFLPLLPVPQLIDQAVSYMIQLKEKVNYLNEMKRRMLGGEVKNRSEGSSLLPKLSIRSLDSIIEMNLVMDLNMKGVMLHKLVSVFEEEGAQVMSANLQNLNDRTFYTIIAQAIICRIGIDPSRIEERLRDIIS							AT1G10586	1
AT1G10590	AT1G10590.3	6.58	10	153		-		-	DNA-binding protein-related | chr1:3502009-3503415 REVERSE	MLLFMANFCRVVIKMAEATSALRKPVFTKVNELRPGTNGHSLNVKVVNTKMVMQRGGGRPMGPQSRQMRIAECLVGDETGIIIFTARNDQVDMMKEGSVVTLRNAKIDMYKGSMRLAVDRWGRVEVAEEPTDITVKDDNNLSLIEYELVSVET		Y					AT1G10590
AT1G15310	AT1G15310.1	6.28	30	479	17.5474	0.000219349	-1.25092	0.0396173	ATHSRP54A (Arabidopsis thaliana signal recognition particle 54kDa A); 7S RNA binding / GTP binding / mRNA binding [AT1G15310.1]	MVLAELGGRITRAIQQMNNVTIIDEKVLNDFLNEITRALLQSDVSFGLVEKMQTNIKKIVNLDDLAAGHNKRLIIEQAIFKELCRMLDPGKPAFAPKKAKPSVVMFVGLQGAGKTTTCTKYAYYHQKKGYKAALVCADTFRAGAFDQLKQNATKAKIPFYGSYTESDPVKIAVEGVDRFKKEKCDLIIVDTSGRHKQAASLFEEMRQVAEATEPDLVIFVMDSSIGQAAFEQAEAFKETVSVGAVIITKMDGHAKGGGALSAVAATKSPVIFIGTGEHMDEFEVFDVKPFVSRLLGKGDWSGLVDKLQEVVPKDLQNELVENLSQGNFTLRSMYDQFQCSLRIPLNQLFSMLPGISAEMMPKGHGEESRVKMKRYMTMMDSMTNKELDSPNPKIFNESR…			Y				AT1G15310
AT1G16225	AT1G16225.1	6.57	13	199	-1.62999	0.13988	-2.3386	0.0318375	similar to syntaxin-related family protein [Arabidopsis thaliana] (TAIR:AT1G16230.1); similar to hypothetical protein OsI_005463 [Oryza sativa (indica cultivar-group)] (GB:EAY84230.1); contains InterPro domain Target SNARE coiled-coil region (InterPro:IPR000727) [AT1G16225.1]	MILERSSLAETSSYARGHASYMRRKITILANGVQTLKNLLAESQGKSISAKEMSRCKDMVEDLRSKAYQMASALDMLKFSNIGSLLGQDDIMSRVIDMDNQEIVGFQRTTMKVQDKALEMLEKGVMHLKREALAMNMELGLQTRLIDRLDHHVDVSASDVEELQRSIDTGVCMTLLLSVVVVVFGLSEFVKFGRRRILG							AT1G16225
AT1G16240	AT1G16240.1	6.93	16	232	1.70268	0.00988687	-1.09483	0.118565	SYP51 (SYNTAXIN OF PLANTS 51) [AT1G16240.1]	MASSSDSWMRAYNEALKLSEEINGMISERSSSAVTGPDAQRRASAIRRKITIFGNKLDSLQSLLAEIHGKPISEKEMNRRKDMVGNLRSKANQMANALNMSNFANRDSLLGPDIKPDDSMSRVTGMDNQGIVGYQRQVMREQDEGLEQLEGTVMSTKHIALAVSEELDLQTRLIDDLDYHVDVTDSRLRRVQKSLAVMNKNMRSGCSCMSMLLSVLGIVGLAVVIWMLVKYM							AT1G16240
AT1G20790	AT1G20790.1	7.14	31	435	1.42591	0.0431225	-1.10916	0.0922544	F-box family protein [AT1G20790.1]	MKRLPLHLLDEILFNLDPKSLGKMRCTNKSINTHISDDPNFKFEYFSRIGSSLLHISKVGSKFLCFYPYAISRLFKNMTPLKNLCNILGSCSGLVLLSINGILCVANPLTKKFRFLHYSIWGNETWIGFAVDQIDRATQRFKIVFISEQLEVSNPYETTYQFRINTGESWSLSKTTITCRASNLKKGKNSKPVYVNGDLHWLRKDGSIVAFNPETEKARLIQSQFNRKPGKLLLCTGDNRLTLISATDAVISVYALETDGQWILVRWIKNEVVHQSLPLLYWNVQAYDGKCLLVRMMSLVGSVIHRYDLRANKWRVLGSIPTWCDADRDFFLFKPSWSSVIGLLDQEHVHVLMPMPMPMPMPMPMPMHMHMHMHMPMPMAMPMPMPIAMAMPMPMPMPM…			Y				AT1G20790			1
AT1G21940	AT1G21940.1	6.04	11	183	-1.49428	0.317295	1.50677	0.369	similar to unknown protein [Arabidopsis thaliana] (TAIR:AT1G21950.1) [AT1G21940.1]	MTGHVAYSWAMEFNLWAHLAFMLVILKIIVAPMVVELEQMRKVREECDVQLLVDYEIAMDDEDGGRERREETRRVNDRFFLAVSLAIFTGICKRASGFDGSYLTETTKNGHVALYCASELNKMADMCFMVVIIRIGLSMLGLTFAPVVMRRLREETDMKLTLGSICLAISLCFSAYLRFFVVG							AT1G21940
AT1G22590	AT1G22590.1	6.45	8	125	-3.95504	0.00253171	-1.59414	0.0166073	AGL87; transcription factor [AT1G22590.1]	MTMAPKRCFKTNESTKSVRVACRSLRSPSVRRLSELPVEKQTKYMMDQKDLMNKMIQDAEKKLEKEKMHTRAMKLGLMAGSNDLITDTDCSEELARAADVVDKKLKAIRERIKAVEAGAPIIKRD	Y					Y	AT1G22590
AT1G30473	AT1G30473.1	7.98	19	239	2.22091	0.0784475	1.23655	0.603525	metal ion binding [AT1G30473.1]	MANPNQSVRTCILKVDLKCCIGCQKKASMKLQSISGVEEVEYNIEKGLMTVRGDVEPMALVRKLNKHDRKTELFSVKYQLDDDDLNSDSEDYSSSDSTNSSYDPKPMERQFQEKMMQQKKKKSGILKMLSLLWCFSSKSKVVQPLPMRNRNWHVPSKFENVPPGFGFNSTTSSQLRPPHPMMPYPPMMQPPMMQQQRPLMMQQQAQVPMPPNVNMFQSAPQPFKMHPKLHYGEQKQVVT							AT1G30473
AT1G32560	AT1G32560.1	6.02	8	134	135.33	0.00187129	3.31242	0.00469559	late embryogenesis abundant group 1 domain-containing protein / LEA group 1 domain-containing protein [AT1G32560.1]	MQSAKQKISDMASTAKEKMVICQAKADEKAERAMARTKEEKEIAHQRRKAKEAEANMDMHMAKAAHAEDKLMAKQSHYHVTDHGPHVPQQAPVPAPAPVMGHGYGHNPTGVTSVPPQTYHPTYPPTGHHNHHHY				Y			AT1G32560	3
AT1G33820	AT1G33820.1	16.02	29	182	4.43072	0.0265548	-1.02071	0.907414	unknown protein [AT1G33820.1]	MMKQKLRVDHDQTMNMMIQPIMLKQSTTTHEREMTHIEDTQTMKMMVENALKQSAMAHEREMSQLKDTLLLKDTQTMNMVKQMMETAFKENAMVHERDMCQLKDTLQLKDTQTINMMTQMSAETYERQMRQMKDIIQQKDRLTMEMMEKMMENALKQSEIAHERGMHHQSPRKGKTCGCNIM							AT1G33820
AT1G33860	AT1G33860.1	8.55	13	153	2.37007	0.0918784	2.15651	0.00311773	unknown protein [AT1G33860.1]	MDSPRPFGWQYLQLRTKYRDFPMGIDSTRLGWMAVLRWKAWIRLGCPGCELGVSVAHGHRYLAAMNWNKKELANCNEDVLGNHLLMGVWLFDDRLRVMNEMFSLPNNPVMNCDETNHIEQSRPQLDVNSGVTTMMMMAEIEMRDKEVIVMKKT						y	AT1G33860
AT1G40104	AT1G40104.1	6.81	42	618		-		-	unknown protein | chr1:15081952-15085893 FORWARDmoderately similar to ( 210)AT2G08986similar to unknown protein [Arabidopsis thaliana] (TAIR:AT2G07981.1); similar to Hypothetical protein CBG09238 [Caenorhabditis briggsae AF16] (GB:XP_001674299.1) | chr2:3625141-3633543 FORWARD	MDFGYTMKALRSKKKIGVRIVSLLEDTKPKTHMDFGYTMKAWRSKKKVGVRIVSLLEDTKPKTHMDFGYTMKALRSKKKVGVRIVSLLEDTKPKTHMDFGYTMKALRRNKKVGYCVRIVSLLEDTKPKTHMDFGYTMKALRSKRKGDTKPKTHMDFGYTMKALRSKKKVDTKPKTHMYFGYTMRALRKLKPQPDLKGVRIVSLLEDTKQKTHMDFCYIMKALRSKKKVDTKPKTQMDFGYTMKALKSKRKVDRKPKTHMYFVYTMKALRSKRKVELKPQPDVISLSSVSLLEDTKPKTHMDFGYTMKALRSKKKVCVRIVSLLEDTKPKTHMDFGYTMKALRSNKKVDTKPKTHMDFGYTMKALRSNKKVGVRIVSLLEDTKPKTHMDFGYTMKALRRN…			Y				AT1G40104			1
AT1G43320	AT1G43320.1	7.69	9	118	1.58804	0.0186811	-1.08522	0.216394	unknown protein [AT1G43320.1]	MVVSSIVDHLMVNSNLDHLMMNPILHSETFGDEPNCRTFDGELHRGAVDDEPHCRPFDSQSEQLMMNPTADHLMVNSNLHYLMMNPISKHLVICSIVEHLVMNSIVAHLKEYPFCSTW			Y				AT1G43320			1
AT1G47389	AT1G47389.1	6.28	15	240		-		-	unknown protein | chr1:17378652-17379374 FORWARD	MVLSGSDLDMMMFLLTNPWLNLSQVWGFTSISDAAISILVLRVFVLFTKGVIVRVMIIWFIHGVFPGMPGLLSLAAIVANIVLMQICALRRMWNPGITSETFAVKISNNVFGLRCMNGWDYFGIKPNFLMGTMTPIRTNWYRVVGFSKLSPGATSFVYVMWSFKQRMPIWHTYHIRVRWLMKEEHNMFNNMLSSKTYRKEASLNSLFQFRHLLAHNFAFVISWFLKFCIGFVLAIVILIV			Y				AT1G47389
AT1G48900	AT1G48900.1	6.68	33	495	1.52051	0.00240493	-1.10848	0.0960615	signal recognition particle 54 kDa protein 3 / SRP54 (SRP-54C) [AT1G48900.1]	MVLAELGGRITRAIQQMSNVTIIDEKALNECLNEITRALLQSDVSFPLVKEMQSNIKKIVNLEDLAAGHNKRRIIEQAIFSELCKMLDPGKPAFAPKKAKASVVMFVGLQGAGKTTTCTKYAYYHQKKGYKPALVCADTFRAGAFDQLKQNATKAKIPFYGSYTESDPVKIAVEGVDTFKKENCDLIIVDTSGRHKQEASLFEEMRQVAEATKPDLVIFVMDSSIGQAAFDQAQAFKQSVAVGAVIITKMDGHAKGGGALSAVAATKSPVIFIGTGEHMDEFEVFDVKPFVSRLLGMGDWSGFVDKLQEVVPKDQQPELLEKLSQGNFTLRIMYDQFQNILNMGPLKEVFSMLPGISAEMMPKGHEKESQAKIKRYMTMMDSMTNDELDSSNPKVFNES…			Y				AT1G48900
AT1G49800	AT1G49800.1	6.54	7	108	2.29109	0.110004	-1.05492	0.573571	unknown protein [AT1G49800.1]	MVMAKNLTKFYVVFLVVLMMVVSLLLAIEGRPVKDSSRSLTQMRDSSMFNGSVIMSSFKPVESSVKDLSWLATVKQSGPSPGVGHHRAKGYKMFGRANDSGPSPGVGH	Y						AT1G49800
AT1G52415	AT1G52415.1	6.09	7	116	1.74565	0.218974	-1.20423	0.0979455	similar to Expressed protein [Arabidopsis thaliana] (TAIR:AT4G28405.1); contains InterPro domain Bifunctional inhibitor/plant lipid transfer protein/seed storage (InterPro:IPR016140); contains InterPro domain Plant lipid transfer protein and hydrophobic protein, helical; (InterPro:IPR013770) [AT1G52415.1]	MVRMMMKVAFAMTCLLVAVTIADAVYRPWPSECVEVANVMVEQCKMFFVHQESPPTAECCRWFSSRRKYAKERRRLCRCLEFLTTAFKNLKPDVLALSDQCHFSSGFPMSRDHTCA							AT1G52415
AT1G56085	AT1G56085.1	6.58	10	153	2.03137	0.100726	1.26906	0.0312886	unknown protein [AT1G56085.1]	MLGGLTYYMDRIKYYNGCLFHTVQKDFTAQTGDHRSWWGFNVQVRYFCTAMIWYLRVMYLKSPRGFIVMSHDRDERGVREKIRRTSPRGRRNTERKERDNREDEYTMWRVDEIEMMIVGVIEIIKERQERHTVEMGEKQGMGEGIDKGMGLFI			Y				AT1G56085	1
AT1G63055	AT1G63055.1	6.48	7	109	1.41063	0.117273	2.76645	0.0684634	similar to unknown protein [Arabidopsis thaliana] (TAIR:AT1G63057.2) [AT1G63055.1]	MVNTKIVALLMVVMMVTMGMENILVQANRRHHHSPSPFPSSDFDDSGSKSPSPSPKSKEKSSTYCMIGCSFEKCFHHGKSSSDVEKYDLCMKKCSKICNKKKESDDIYV							AT1G63055
AT1G63057	AT1G63057.1	7.83	9	116		-		-	unknown protein | chr1:23382172-23382989 FORWARD	MMNTKIVALLMVVMMVTMGMENILVQARHHHHHHHHSPSPSPSSDFDDSGSKSPSPSPKSKEKSSTYCMIGCSFEKCFHHGKSSTMTTGDVEKYDSCMKKCSKICNKKNENEDIYV							AT1G63057		1	1
AT1G63800	AT1G63800.1	6.52	12	185	-1.05376	0.760339	-3.55785	0.000949477	UBC5 (UBIQUITIN-CONJUGATING ENZYME 5); ubiquitin-protein ligase [AT1G63800.1]	MSSPSKRREMDLMKLMMSDYKVEMINDGMQEFFVEFSGPKDSIYEGGVWKIRVELPDAYPYKSPSVGFITKIYHPNVDEMSGSVCLDVINQTWSPMFDLVNVFETFLPQLLLYPNPSDPLNGEAAALMMRDRPTYEQRVKEYCEKYAKPRADTEEMSSDDEMSEDEYASDGDDEDDVAIAGKLDP							AT1G63800
AT1G64405	AT1G64405.1	6.84	8	118	-9.61509	0.00143984	-1.17656	0.160901	unknown protein [AT1G64405.1]	MGNCMERWMQGEGEEGKIEVTERAKESFKLDGDDNEDGHGGMKVKIVLTRHELDMFLLQMNRSHDGNLMITKDVMVELEKRIIRASSFSSLSSSPSSIAWEPALESILECPEVQEMDR							AT1G64405		1
AT1G64690	AT1G64690.1	6.25	17	273	1.28682	0.167743	-1.18969	0.0616121	similar to unknown protein [Arabidopsis thaliana] (TAIR:AT3G11590.1); similar to unnamed protein product [Vitis vinifera] (GB:CAO62905.1) [AT1G64690.1]	MKDMKMQSSPETMMTRIPTPDPHSTGVREDAMDSVCKPWKLYENPYYCSSQSQQHQHQRKAFIWDLNFIKVFMESELGKAQDEIKELKAELDYERKARRRAELMIKKLAKDVEEERMAREAEEMQNKRLFKELSSEKSEMVRMKRDLEEERQMHRLAEVLREERVQMKLMDARLFLEEKLSELEEANRQGERERNRMMKPKILERACSSPARRRCENPQIKRGINPFPRVMRAIRSKSEKWGSKLECQKVQLKILLRQKTTPRCTPLLSSPPP							AT1G64690
AT1G67350	AT1G67350.1	6.15	8	131	-1.03007	0.616202	-1.20672	0.0118737	unknown protein [AT1G67350.1]	MRCMRGARRLRRCGHCLFVLMDSGHLSVTMLSFVGILRSVRLLVEGILMMIFSRTTTLLLLPLPHLQTNQTMKEDVLCCLDGCMFVFKLFFSEFVRFCFYLFLRCLGAWYKTQIITSNLFTNEKEIMLIGS							AT1G67350		1
AT1G67870	AT1G67870.1	7.91	22	279	1.22826	0.266786	-4.10216	0.000795647	glycine-rich protein [AT1G67870.1]	MLDKLTRGIGGLRRGHGHFQASAGFGFEEHKEFSSRVESSGGFVDRQARYNHRTGNHGRPPMHVWDEEDSDSDVEEFFESSRTQHTTALPQPLHMNFRPPPPVTQPHHNGKMGKIGNGLQQGHEIHGMKHQGGHGIQHHDIHGMQHQGGHGMQHQGMHGMQHQGGHGMQHQGGHGMQHQGMHGMQHQGGHGMEHQGGHGMQHQDMHGMQHQGRHGMQHQGGHEMQHQGMHGMQHQGGHRIQHQGMHGMQHPGGVVVNATENWRVSKITGQKLGWGGKGL							AT1G67870
AT1G68160	AT1G68160.1	6.62	18	273	1.64559	0.00176235	-1.18677	0.051174	similar to unknown protein [Arabidopsis thaliana] (TAIR:AT1G10820.1); similar to unknown protein [Arabidopsis thaliana] (TAIR:AT1G10820.2); similar to unnamed protein product [Vitis vinifera] (GB:CAO15416.1) [AT1G68160.1]	MWMATQSNSGFDSLSSMMSRHAINFQSNTSSEMTPMSPYLGMNMNMINVGSPGFLQTGNSSNGSDSGSGLKLDTSMVSEWSNEEQYILDAGLEKYKDMPSIDMYIQIGNTLPDKSIRDIALRCRWLRRKRRKSEELNCGRRASSSKGKQVESSSKSSIPSVLPHNMASYPFSGPSTSTSKQITSEDLSSYATNLIEQNVRAFSQIRANLSSYKAGDNLDLFRQARNNLITIQNEINNMPGLMNKMPPLPVTINDDLSVMMPFNTMQSGGFHRK	Y						AT1G68160		1
AT1G68240	AT1G68240.1	6.52	12	185	-1.82398	0.214032	-2.76749	0.0274232	transcription factor [AT1G68240.1]	MERNNRNEGTHEEEQCSLSDIIYSFCSENHSELNPLQEIFGVTKNNDHEKHDEEPDEESYRMAKRQRSMEYRMMMEKKRRKEIKDKVDILQGLMPNHCTKPDLASKLENIIEYIKSLKYQVDVMSMAYTTTPVYTPPFYAAAQAPCMSPWGYYTPGVPMMPQQNMTYIPQYPQVYGTVPPNQTQP							AT1G68240			1
AT1G72510	AT1G72510.1	6.1	10	165	-1.56478	0.047007	1.00899	0.9181	similar to unknown protein [Arabidopsis thaliana] (TAIR:AT2G09970.1); similar to hypothetical protein [Vitis vinifera] (GB:CAN73516.1); contains InterPro domain Protein of unknown function DUF1677, plant (InterPro:IPR012876) [AT1G72510.1]	MSASVLSDPTMLISTPEVILVSPVSVTQISGDEPDSVTCDCCGLTEECTQSYIEMVRERYMGKWICGLCSEAVKYEVMRTKRLLTTEEAMARHMNMCNKFKSSSPPPNPTGHLISAMRQILRKSLDSPRMLRSMPNSPSKDDQDHHHDCVSNVLSRSDSCFASLT							AT1G72510	3	1
AT1G76640	AT1G76640.1	7.59	12	159	-28.693	0.018061	1.08397	0.596595	calmodulin-related protein, putative [AT1G76640.1]	MKNTQRQLSSSFMKFLEEKNRDLEAVFAYMDANRDGRISAEELKKSFKTLGEQMSDEEAEAAVKLSDIDGDGMLDINEFALLIKGNDEFTEEEKKRKIMEAFRMYIADGEDCITPGSLKMMLMKLGESRTTDDCKVMIQAFDLNADGVLSFDEFALMMR	1						AT1G76640
AT1G77682	AT1G77682.1	6.73	7	105	1.49814	0.0235576	-1.06126	0.248759	Encodes a Plant thionin family protein [AT1G77682.1]	MAANGRVIIIAMLMVAMVMNMTWCVNSKGFVNLGISPEELQSCIKTCIPEQCMPEANNLTVCEKACHKYCNRPAMSFKPNYVVPVDGNDVGFIKAAFCKLWCEEN							AT1G77682			1
AT2G06530	AT2G06530.1	6.25	14	225	2.18462	0.027471	1.18047	0.0529662	VPS2.1 [AT2G06530.1]	MMNSIFGKRKTPAELLRENKRMLDKSIREIERERQGLQTQEKKLINEIKKTAKQGQMGAVKVMAKDLIRTRHQIEKFYKLKSQLQGVSLRIQTLKSTQAMGEAMKGVTKAMGQMNRQMNLPSLQKIMQEFERQNEKMEMVSEVMGDAIDDALEGDEEEEETEDLVSQVLDEIGIDINQELVNAPSGAVAVPAAKNKVVQAEATGAEDSGGIDSDLQARLDNLRKM							AT2G06530
AT2G07708	AT2G07708.1	6.43	9	141	-1.40255	0.184429	-2.04464	0.0453765	Identical to Uncharacterized mitochondrial protein AtMg00500 [Arabidopsis Thaliana] (GB:P93305); similar to hypothetical protein BrnapMp004 [Brassica napus] (GB:YP_717103.1) [AT2G07708.1]	MRQNMSILPPSSFSRNFLLVRCSPIQVWKYSMNTLCTMHGWMKLYLEYQRWNCMLRLSASIELEVFMDVPIFIRTYYRPANMDDSFRYGIIFRMYDLAVQLQWGNVMKLLLVTKTQVEKKKALNLNVSKTRDGRGGLNQQG		y				y	AT2G07708		1
AT2G17190	AT2G17190.1	6.7	36	538	1.55393	0.0390295	-1.0336	0.547237	ubiquitin family protein [AT2G17190.1]	MGGEADSRQPLTAEGVAVAVNVRCSNGTKFSVTTSLDSTVESFKELIAQNSDVPANQQRLIYKGRILKDDQTLLSYGLQADHTVHMVRGFVPSSPSAPAANAGNQTTAPQAVGSNDSSNLGGGESLFPGLGFNPLGGGNAMAGLFGSGLPDLEQAQQQLAQNPNMIREMMNTPAIQNLMNNPEFMRSMIMNNPQMRELVDRNPELGHVLNDPSILRQTLEAARNPELMREMMRNTDRAMSNIESMPEGFNMLRRMYENVQEPLMNATTMSENAGNNTSSNPFAALLGNQGVTTQGSDTSNNISAPNAETGTPNANPLPNPWGATAGQTTAPGRTNAGLGGLGGLGGLGGLGMLGADSPLGATPDASQLSQILQNPAMSQMMQSVLSNPQYMNQLMSLNP…							AT2G17190
AT2G17200	AT2G17200.1	6.18	34	551	1.17195	0.309578	1.17971	0.250684	ubiquitin family protein [AT2G17200.1]	MGGEGDSSQPQSGEGEAVAVNIRCSNGTKFSVKTSLDSTVESFKELVAQSSDVPANQQRLIYKGRILKDDQTLLSYGLQADHTIHMVRGSAPSSAPPPAPAASQTTAPSVTRGVGSDNSSNLGGASPGESLFPGLGFNPLGGGNAMSGLFGAGLPDLVQTQQQLAQNPNMIRDMMNTPAIQNLMNNPEFMRSMIMNNPQMRELVDRNPELGHVLNDPSILRQTLEAARNPELMREMMRNTDRAMSNIESMPEGFNMLRRMYENVQEPLMNATTMSGNAGNNTGSNPFAALLGNQGVTTQGSDASNNSSTPNAGTGTIPNANPLPNPWGATGGQTTAPGRTNVGGDARSPGLGGLGGLGSLGGLGGLGMLGADSPLGATPDASQLSQLLQNPAISQMMQS…							AT2G17200		1	1
AT2G21100	AT2G21100.1	6.99	13	187	2.13455	0.173502	-1.55526	0.0475395	disease resistance-responsive protein-related / dirigent protein-related [AT2G21100.1]	MAKEEYVSRMLVMLIMIMPLVAQGSRLHSWANRLEETGKDKVTNLQFYFHDTLSGKNPTAVKVAQGTDTEKSPTLFGAVFMVDDALTETADPKSKLVGRAQGLYGSSCKEEVGLIMAMSFCFEDGPYKDSTISMIGKNSAMNPIREMPIVGGTGMFRMARGYAIARTNWFDPKTGDAIVGYNVTIMH			Y		y		AT2G21100
AT2G21655	AT2G21655.1	7.1	11	156	1.57579	0.0228813	-1.08996	0.0576892	similar to unknown protein [Arabidopsis thaliana] (TAIR:AT3G29797.1); contains InterPro domain Protein of unknown function DUF784, Arabidopsis thaliana (InterPro:IPR008502) [AT2G21655.1]	MENKTMFMIFSLIMVLLSFSHPTFGKESDNDKPLLISDDEFDAMMARSPTSDNYNENVGSKYSKKQINYLMNCSKKMAVPDKCIEEVMAEIIQNKSASRDCCLGIVKAGKECHMEYMKLFFQMYELRRFTSKRFSKTNEIWNRCSTEIGVVSPYSG							AT2G21655
AT2G21727	AT2G21727.1	6.67	10	151	1.91342	0.00465006	1.30314	0.696775	Encodes a ECA1 gametogenesis related family protein [AT2G21727.1]	MENKTMFMIFSSIMVLLSFSHLTLAKERGNDEPLLISDDEFDAMMARSPASDDYNDNMLRKYSEKEKDYLKNCGKKMDMPYGPYQCADEVIAYIVQNKSVSRVCCWGIVKAGKECHKKWTGLFFEMYQLKRFSSKKFSKTNEIWNMCSTDN							AT2G21727
AT2G26975	AT2G26975.1	6.94	10	145	-1.82995	0.00117562	-1.34232	0.0576409	copper transporter, putative [AT2G26975.1]	MDHGNMPPSSPSSMVNHTNSNMIMMHMTFFWGKNTEILFSGWPGTSLGMYVLCLIVVFLLAVIVEWLAHSSILRGRGSTSRAKGLVQTAVYTLKTGLAYLVMLAVMSFNGGVFIVAIAGFAVGFMLFGSTAFKNPSDDEKPFEQL	Y		Y				AT2G26975
AT2G27030	AT2G27030.2	6.25	7	113	1.33486	0.184454	-1.55731	0.00293001	CAM5 (CALMODULIN 5); calcium ion binding [AT2G27030.2]	MRSLGQNPTEAELQDMINEVDADGNGTIDFPEFLNLMARKMKDTDSEEELKEAFRVFDKDQNGFISAAELRHVMTNLGEKLTDEEVDEMIKEADVDGDGQINYEEFVKVMMAK							AT2G27030			1
AT2G27050	AT2G27050.1	6.17	36	584	-1.4416	0.0430552	1.09788	0.0868522	EIL1 (ETHYLENE-INSENSITIVE3-LIKE 1); transcription factor [AT2G27050.1]	MMMFNEMGMYGNMDFFSSSTSLDVCPLPQAEQEPVVEDVDYTDDEMDVDELEKRMWRDKMRLKRLKEQQSKCKEGVDGSKQRQSQEQARRKKMSRAQDGILKYMLKMMEVCKAQGFVYGIIPEKGKPVTGASDNLREWWKDKVRFDRNGPAAIAKYQSENNISGGSNDCNSLVGPTPHTLQELQDTTLGSLLSALMQHCDPPQRRFPLEKGVSPPWWPNGNEEWWPQLGLPNEQGPPPYKKPHDLKKAWKVGVLTAVIKHMSPDIAKIRKLVRQSKCLQDKMTAKESATWLAIINQEEVVARELYPESCPPLSSSSSLGSGSLLINDCSEYDVEGFEKEQHGFDVEERKPEIVMMHPLASFGVAKMQHFPIKEEVATTVNLEFTRKRKQNNDMNVMVMD…							AT2G27050
AT2G28610	AT2G28610.1	6.17	15	244	-1.24657	0.609414	2.20458	0.0183318	PRS (PRESSED FLOWER); transcription factor [AT2G28610.1]	MSPVASTRWCPTPEQLMILEEMYRSGIRTPNAVQIQQITAHLAFYGRIEGKNVFYWFQNHKARDRQKLRKKLAKQLHQQQHQLQLQLQQIKPKPISSMISQPVNKNIIDHHNPYHHHHHNHHHNHHRPYDHMSFDCCSHPSPMCLPHQGTGVGEAPSKVMNEYYCTKSGAEEILMQKSITGPNSSYGRDWMMMMDMGPRPSYPSSSSSPISCCNMMMSSPKIPLKTLELFPISSINSKQDSTKL							AT2G28610
AT2G36355	AT2G36355.2	6.25	7	113	-1.29203	0.380654	-1.2509	0.020488	similar to unknown protein [Arabidopsis thaliana] (TAIR:AT3G52900.1); similar to hypothetical protein [Vitis vinifera] (GB:CAN75481.1); similar to unnamed protein product [Vitis vinifera] (GB:CAO46538.1); contains InterPro domain Protein of unknown function DUF662 (InterPro:IPR007033) [AT2G36355.2]	MRMKATRLPMKTYISVLSNTNIVSKGLEIMGDPMRKEVGMVRKKIEMANREIKSLSQSCQKKEREYKEIHEAFDEKNKEKAHLVSILMELLAESERVRVKKLEEINKTIGSLR							AT2G36355
AT2G36930	AT2G36930.1	6.09	12	198	-1.8196	0.00192626	1.06497	0.0529383	zinc finger (C2H2 type) family protein [AT2G36930.1]	MGRCPTRKVKKRRLSHKTARRDKFEVKGDDLVYTELRKPETEIKPLQLDEDLPGMGQFYCLHCDRYFSNVSVRDDHFKTKKHKKRVNMMMGQAPHSQLDADLAGGMGMPDNGPKLMSNLVFTELRKPETEDLPGMGQFNCLLCHRNFSNASVMDYHFKTKKHKKRVKKIERPAPHSQLDADLAGGMGMPDNGPKLMSA							AT2G36930
AT2G37410	AT2G37410.1	8.26	20	243	1.22414	0.0147329	1.41747	0.00191937	ATTIM17-2 (Arabidopsis thaliana translocase inner membrane subunit 17-2); P-P-bond-hydrolysis-driven protein transmembrane transporter [AT2G37410.1]	MGTPETSREPCPDRILDDIGGAFGMGAVGGSAFHFIKGTYNSPKGSRFVGGTQSVSMNAPRTGGSFAVWGGLFSTFDCTMVYLRQKEDPWNSIIAGAATGGFLSMRQGAGAASRSAIFGGVLLALIEGAGIMLNKVLAQPQNMMMEDPGMQGMPGMQGMQGMPGMPGMQGMPGMQGMQMGQMQSQAQIRSESQNQNTASSSSSSSWFGGLFDKKKEEVQPGSESKTEVLESFDAPPVPSFEFK							AT2G37410
AT2G41780	AT2G41780.1	6.35	8	127	1.1013	0.607987	-1.46771	0.0116601	unknown protein [AT2G41780.1]	MDDKTAGGKIVMNKEQLLLFMENRRKQEDHRLALAKEATRSEMVDRKASGKIIMNHDQQLMFNEDHRLAVKKASRSEMVDLEGMGSEASVIMSNVPQPTSFSEDHKLAIKNIISKIVKEIRDRDHPA							AT2G41780		2
AT2G46600	AT2G46600.1	8.21	11	135	-1.01926	0.931003	-2.45765	0.00179525	calcium-binding protein, putative [AT2G46600.1]	MEPTEKSMLLETTSTTKMETKYEDMLPVMAEKMDVEEFVSELCKGFSLLADPERHLITAESLRRNSGILGIEGMSKEDAQGMVREGDLDGDGALNQTEFCVLMVRLSPEMMEDAETWLEKALTQELCNHNLSSMP				Y			AT2G46600
AT3G05220	AT3G05220.1	8.33	48	577	-4.1366	0.00813637	1.07152	0.0937492	heavy-metal-associated domain-containing protein [AT3G05220.1]	MNKQDVMKLQTCVLKVNVHCEGCKHKVKKQLQKIEGVYSVKADVEQGRVTVTGNIDPALLVKKLSKSGKHAEILGGGGGGGGGGGKGFPNLNGQFANLNMGGNNKPKGGKESNQVKGKAGGGGGGGQNHGHGQPMQLNPQQIQQMMMMKAAHGGGGGGQMKMPPMAAKDQKKSVKFADDEDDEFSEDDYDDEDFSEDDYDDDEFDDDEDDDDEMGHGHGHGGGGGNHMPPNKMMMPNKMMPQMGGHHGNGGGPKGPNEIMMMMNGFKGGGGGGKKGGGGGFEIPVQMKGMGEGKNGKDGKKGKGGEKGKKEGKENKGGGKTGKTDAKSGGGGLLGFFKKGKSGNGDEKKSAGKKDGHGGNKVKSHGGGGGVQHYDSGPKKGGGGTKGGGHGGLDIDELM…							AT3G05220
AT3G06130	AT3G06130.1	6.14	29	473	-300.376	0.00103723	-1.3312	0.0117302	heavy-metal-associated domain-containing protein [AT3G06130.1]	MSKEEFMKIQTCVLKVNIHCDGCKQKVKKILQKIEGVFTTKIDSEQGKVTVSGSVDPSVLIKKLAKSGKHAEIWGAPKGNNNPNQSQMANQFKGMQIDHGKAGGGGGGNNNNNKKGQKNGGGGGGGGGGGNSNAPKMGQQLNPQHLQQLQQLQKMKGFQDLKLPPQLKGSVPVNKNQNQKGVKFDVPEDDDDDDFSDEFDDEFTDDDDDEFDDEFDDLPLPSNKMKPNMTMMPNAQQMMMNAQKNANLAGGPAKNGGKGAPAAGGGGAGGGKGAGGGAKGGPGNQNQGGGKNGGGGHPQDGKNGGGGGGPNAGKKGNGGGGPMAGGVSGGFRPMGGGGPQNMSMPMGGQMGMGGPMGNMPAVQGLPATGPGGAPQGYFQGAGIDPMQMQQQQQQQQYLA…							AT3G06130
AT3G07560	AT3G07560.1	7.26	22	304	1.44425	0.0117819	1.23481	0.0435926	APM2/PEX13 (ABERRANT PEROXISOME MORPHOLOGY 2); protein binding [AT3G07560.1]	MASQPAGGSPPKPWEKEGNTSGPNPFRPPSNTSTAGSVEASGTANPGEVVPPPVNRPNTAANMNSLSRPVPARPWEQQNYGSTMGGGYGSNLGMTSGYGSGTYGSALGGYGSSYGGGMYGGSSMYRGGYGGGGLYGSSGMYGGGAMGGYGGTMGGYGMGMGTGMGMGMGMGMGGPYGSQDPNDPFNQPPSPPGFWISFLRVMQGAVNFFGRVAMLIDQNTQAFHMFMSALLQLFDRGGMLYGELARFVLRMLGVRTRPRKMQQPPQGPNGLPLPHQPHGNQNYLEGPKTAAPGGGGGWDNVWGN	Y						AT3G07560
AT3G10640	AT3G10640.2	6.51	11	170		-		-	Symbols: VPS60.1 | VPS60.1 | chr3:3323310-3325039 REVERSE	MRVLKQKKMYEGQRDMLYNQTFNLDQVSFAAEGLKDAQQTMTALKSANKELKGMMKTVKIQDIDNLQDEMMDLMDVSSEIQESLGRSYNIPDGLDEDDLMGELDALEADMGNETEADGMPSYLQPDTETDYDSELNLPAAPTGHNGAPHGRAQAEDEFGLPAVPRASLRG							AT3G10640		2
AT3G11160	AT3G11160.1	6.94	10	145	3.51116	0.00763037	-1.59903	0.148587	unknown protein [AT3G11160.1]	MPPNNNLRSVIAQCRNFYTSRSSREWKREMFLIRGPGMALGLGLGYIVVGGNVSELEADRRQWTGDHVDLRKKMWPELKDKEWFRITSRMWSESDIRKKMLRMRSDLWESMGVSRSSDLWEEKMWDYLTKKMWYDLWKSMWSDRS			Y			y	AT3G11160
AT3G11530	AT3G11530.1	6.25	7	113	1.71403	0.00292796	-1.4964	0.00417084	vacuolar protein sorting 55 family protein / VPS55 family protein [AT3G11530.1]	MFSSSILLQILACAIYGNWWPMLSALMYVVVPMPCMFFGGGSTQFLISRDGGGWIDAAKFLTGASTVGSLAIPIILRHAQMIETGAMLIEFTSFFIFICTVMCFHRASLDDDW							AT3G11530		3
AT3G11825	AT3G11825.1	6.06	6	100	1.71149	0.0192457	-1.08474	0.0771288	Encodes a Protease inhibitor/seed storage/LTP family protein [AT3G11825.1]	MKIIPLMSIALVIFMTSFPAPIKVAGGVGNCEKDMQWCIDKTEFFTHGYIYERCCYNMIMKKKCMCLFLKSPKLKIAARNVNNACGRGGLPKDAFSEFKC							AT3G11825	1
AT3G13227	AT3G13227.1	6.36	7	111	1.16456	0.735543	2.76365	0.000762535	serine-rich protein-related [AT3G13227.1]	MEGKEEEAKRRMMMKIKLKETEADVSQDDIKRQEAYNMSPRVRRGGGGGGGSVGMSKSSSVRQNCLCAPTTHPGSFRCRYHRRNAGLGMSRGTSVPSNLSMLAGGDSNSPK							AT3G13227
AT3G16960	AT3G16960.1	6.19	7	114	2.54223	0.01167	-1.1908	0.0470503	similar to self-incompatibility protein-related [Arabidopsis thaliana] (TAIR:AT3G16970.1); contains InterPro domain Plant self-incompatibility S1 (InterPro:IPR010264) [AT3G16960.1]	MGALAELVALIIVMCASVTMSLAQNPMASPPSVENPNTTVVIHNALSGYWPMAYHCASKDVDFGLRRMLAERDQESAMFGCKRCEWKIREEGPCKLNKKTGMFDLCPPWDSQNI							AT3G16960		1	1
AT3G18540	AT3G18540.1	6.74	18	268	-1.62062	0.106402	-1.09483	0.74217	unknown protein [AT3G18540.1]	MGMGMGMGMGMGMGMGMGMGMGMGMGMGKAMAMATAFSLFFFKMISSQAVGFDDTHDNHEETEATRKGHPRILRYTTQNSRHPREFMSSPEGLTSFSITPSPSSKSITPSAMFCVYGIIGLSTISPKEDKIPKWNTATGDSDGGRDAERTRKIQNQRSNTATGDGDGGRDDERTRKIQNQRWIKANSTTRSRSATEIRLRRVGTRQHRSVKEKGEEEKRNFYNLRTARILILSILEQKRKLNPSPTFCNYGANVLLSWFFSGTGIESD							AT3G18540
AT3G20557	AT3G20557.1	6.2	8	130	1.50733	0.0215127	-8.90651	0.00714346	similar to unknown protein [Arabidopsis thaliana] (TAIR:AT1G50930.1) [AT3G20557.1]	MENSALSNCVRRTNFSNQQRTMQEGLEESSWTMYFETEDGLGHYDDSSMMSDAASPMGCVEEDTASSPSNRTEGYSGMEDNTIEEKTMNNGKIEEKILNKNGIKIEEYCAELKKRGLCLVPLSMLSNYIG							AT3G20557
AT3G23050	AT3G23050.1	6.2	15	243	-3.5579	0.0124037	-1.74432	0.000493288	IAA7 (AUXIN RESISTANT 2); transcription factor [AT3G23050.1]	MIGQLMNLKATELCLGLPGGAEAVESPAKSAVGSKRGFSETVDLMLNLQSNKEGSVDLKNVSAVPKEKTTLKDPSKPPAKAQVVGWPPVRNYRKNMMTQQKTSSGAEEASSEKAGNFGGGAAGAGLVKVSMDGAPYLRKVDLKMYKSYQDLSDALAKMFSSFTMGNYGAQGMIDFMNESKLMNLLNSSEYVPSYEDKDGDWMLVGDVPWEMFVESCKRLRIMKGSEAVGLAPRAMEKYCKNRS							AT3G23050	1		1
AT3G28190	AT3G28190.1	8.11	9	112	1.29085	0.0835375	-1.04619	0.621143	unknown protein [AT3G28190.1]	MGIWSYMGKTSVFIFGLGFYTYAALFSNSDNKMLMTQLESFKETVKVQMESFTEPSKAQMAKYREMEQKMEAKYREMENKLDNLVKLSMTQISELKVTREKCCNDFWKSRST	Y						AT3G28190
AT3G28990	AT3G28990.1	8.77	10	88	-1.10299	0.832542	-1.06338	0.217785	similar to unknown protein [Arabidopsis thaliana] (TAIR:AT3G55240.1); similar to unnamed protein product [Vitis vinifera] (GB:CAO41583.1); contains InterPro domain Conserved hypothetical protein CHP01589, plant (InterPro:IPR006476) [AT3G28990.1]	MRHSSPAVYIHLVQHMIETCLTFNMSKEECMEALSENANINPIITSTVWKELVKENKDFFETYEQKLMKKESMSEEETNQLIQNIISL*		Y					AT3G28990			1
AT3G29070	AT3G29070.1	7.59	17	225	1.52327	0.0257335	-1.32366	0.29118	protein transmembrane transporter [AT3G29070.1]	MDLLPSRYKIHKTKLRWILTMMTMMMMMVMRRGESMRLDMESGNTKCISDDIKTNYMTVGTYSIVNPNEGHHLPPSHKLFVTVSSPKGKSHHHAENVESGKFVFTAEETGDYMTCFVAPGYRPTAKFAVDFEWKSGVEAKDWTTIAKRGQITMLEVEVRKLLDVTETIHEEMFQLIEREREMQELNRSTNSRMAALSLLSFVVTMSVAGLQLRHLKSFLERKKLL						y	AT3G29070
AT3G30845	AT3G30845.1	8.65	9	105	1.8997	0.0325017	-1.02822	0.947345	unknown protein [AT3G30845.1]	MVLLTPNCSDDEIDGICCEESGNNDCHLDDGWYVNVPSEIKSDYICGEESDGDDEEVTLSEVDELEDLEDDESETMMMTTKKMKKTMKETIMNMNMMTLKTTYLK							AT3G30845
AT3G43410	AT3G43410.1	7.44	9	122	1.4721	0.440989	-1.08711	0.0662544	similar to unknown protein [Arabidopsis thaliana] (TAIR:AT5G35945.1) [AT3G43410.1]	MENLGHRFLMSSDANYLGRLKSLAVAVDIMNTKELEMFRQILVAWNGIMKKLDICFKMFNFSGLNKKQFALASRFITQGTVMNTMMIETSLIPPVEKFYIEAAVAKLMELPKGNKNLSIGYF						y	AT3G43410
AT3G44935	AT3G44935.1	7.34	8	110	1.52453	0.399732	-1.19729	0.3195	similar to unknown protein [Arabidopsis thaliana] (TAIR:AT5G28420.1) [AT3G44935.1]	MDMLEDEMSLCKVMMLYLAEGRSLELIENIFRSSKTKGRVIYNTMISVYGKHFAENAHQLFLEMVNNRIRLSGHTFKYHLEAWTIACKPQRTLEFLHFMILFFIKGKKKM			Y				AT3G44935
AT3G46900	AT3G46900.1	7.01	11	158	-4.50739	0.00109358	-1.49387	0.060491	COPT2 (Copper transporter 2); copper ion transmembrane transporter [AT3G46900.1]	MDHDHMHDMPPPSPSSSSMSNHTTPHMMMMHMTFFWGKNTEVLFSGWPGTSSGMYALCLIVIFLLAVIAEWLAHSPILRVSGSTNRAAGLAQTAVYTLKTGLSYLVMLAVMSFNAGVFIVAIAGYGVGFFLFGSTTFKKPSDDQKTAELLPPSSGCVC	Y						AT3G46900
AT3G49270	AT3G49270.3	7.28	11	152		-		-	unknown protein | chr3:18267398-18268270 REVERSE	MFSKMQLVVLMSFLLLLPLCSSRFGESHEDGVPHTDQYSLNMVEESIPKMMETGTNPSHDQTTNGWGRPTRPPPSRMMDYPKTYPNPSRGQTTNRVIRLSPPPPRMMDYPKKDPNPSHDQTINRVIRLSPPPPRMMDYPKAYPNPSRATIRQ							AT3G49270	1
AT3G50330	AT3G50330.1	7.39	17	231	1.32839	0.139154	-1.00253	0.996756	HEC2 (HECATE 2); DNA binding / transcription factor [AT3G50330.1]	MDNSDILMNMMMQQMEKLPEHFSNSNPNPNPHNIMMLSESNTHPFFFNPTHSHLPFDQTMPHHQPGLNFRYAPSPSSSLPEKRGGCSDNANMAAMREMIFRIAVMQPIHIDPESVKPPKRKNVRISKDPQSVAARHRRERISERIRILQRLVPGGTKMDTASMLDEAIHYVKFLKKQVQSLEEHAVVNGGGMTAVAGGALAGTVGGGYGGKGCGIMRSDHHQMLGNAQILR							AT3G50330
AT3G50360	AT3G50360.1	6.55	11	169	3.1161	0.000543555	1.19404	0.000992738	ATCEN2 (CENTRIN2); calcium ion binding [AT3G50360.1]	MSSIYRTVSRKEKPRRHHGLTTQKKQEIKEAFELFDTDGSGTIDAKELNVAMRALGFEMTEEQINKMIADVDKDGSGAIDFDEFVHMMTAKIGERDTKEELTKAFQIIDLDKNGKISPDDIKRMAKDLGENFTDAEIREMVEEADRDRDGEVNMDEFMRMMRRTAYGGN							AT3G50360
AT3G50890	AT3G50890.1	6.45	16	249	-22.6077	0.0116265	-1.66936	0.0016028	ATHB28 (ARABIDOPSIS THALIANA HOMEOBOX PROTEIN 28); DNA binding / transcription factor [AT3G50890.1]	MELGGKCNAITTTTMISTEVKPHTDPEPEAKPESDPSMALFPIKKENQKPKTRVDQGAKYRECQKNHAASTGGHVVDGCCEFMAGGEEGTLGALKCAACNCHRSFHRKEVYGHRNSKQDHQLMITPAFYSSNSSYKPRVMHPTGEIGRRTSSSSEDMKKILSHRNQNVDGKSLMMMMMRKKKRVRTKINEEQKEKMKEFAERLGWRMQKKDEEEIDKFCRMVNLRRQVFKVWMHNNKQAMKRNNSNISE							AT3G50890
AT3G51920	AT3G51920.1	7.33	11	151	-1.38699	0.0761159	1.4145	0.0130097	CAM9 (CALMODULIN 9); calcium ion binding [AT3G51920.1]	MADAFTDEQIQEFYEAFCLIDKDSDGFITKEKLTKVMKSMGKNPKAEQLQQMMSDVDIFGNGGITFDDFLYIMAQNTSQESASDELIEVFRVFDRDGDGLISQLELGEGMKDMGMKITAEEAEHMVREADLDGDGFLSFHEFSKMMIAASY							AT3G51920
AT3G52270	AT3G52270.1	6.64	19	287	-1.12749	0.70701	-1.46607	0.014008	ATP binding / RNA polymerase II transcription factor/ catalytic [AT3G52270.1]	MSLREMEDVKVEMKVRKNENEALETGLAERSMLLMKAPSLVASSLQSHSFPDDPYRPDDPYRPDAKVILGVDPLAHEDEGTQFVMELARADSGNMPRRYTLDMSKDFIPMNVFCESSDDFGSLGEEFSIGMFIYSPGKMSVEGKIKNKFDMRPHNENIESYGRLCRERTNKYMGKNRQIQVIDNARGMHMRPMPGMIIPTAAPEKKKLTNRTSEMKRTRRDRREMEEVMFNLFERQSNWTLRLLIQETDQPEQFLKDLLKDLCIYNNKGSNQGTYELKPEYKKATQE							AT3G52270	1
AT3G55240	AT3G55240.1	6.12	6	95	-60.288	0.00727828	-26.8765	0.000859319	Overexpression leads to PEL (Pseudo-Etiolation in Light) phenotype. [AT3G55240.1]	MADSSSASYIHMVQHMIEKCLIFHMSKEECVEALSKHANITPVITSTVWKELEKENKEFFKAYEERQSKQEQMSEEETNQMIQKIISDSSKESDD*							AT3G55240	1
AT3G56610	AT3G56610.1	7.09	9	128	1.12887	0.683414	-1.22952	0.24778	unknown protein [AT3G56610.1]	MALKATMVTKSMFAALFTIIAMATLASAASGLAQSPESDHLVNKCMAKLSSRCAMYVTDAICTIHGPMRLKHHGCCLEVFHMGRACLKIVTNHVIQMFLPKFEGVRKQYSLEKSTYIMQLCVPVLTIS							AT3G56610		1
AT3G59900	AT3G59900.1	6.2	8	130	10.6993	0.0107972	-2.56973	0.015182	(ARGOS); unknown protein [AT3G59900.1]	MIREISNLQKDIINIQDSYSNNRVMDVGRNNRKNMSFRSSPEKSKQELRRSFSAQKRMMIPANYFSLESLFLLVGLTASLLILPLVLPPLPPPPFMLLLVPIGIMVLLVVLAFMPSSHSNANTDVTCNFM	Y						AT3G59900			1
AT3G62090	AT3G62090.1	6.38	22	346	64.5614	0.0201862	2.27707	0.00202643	PIL2 (PHYTOCHROME INTERACTING FACTOR 3-LIKE 2); transcription factor [AT3G62090.1]	MELVFENGQILAKGQRSNVSLHNQRTKSIMDLYEAEYNEDFMKSIIHGGGGAITNLGDTQVVPQSHVAAAHETNMLESNKHVDDSETLKASSSKRMMVDYHNRKKIKFIPPDEQSVVADRSFKLGFDTSSVGFTEDSEGSMYLSSSLDDESDDARPQVPARTRKALVKRKRNAEAYNSPERNQRNDINKKMRTLQNLLPNSHKDDNESMLDEAINYMTNLQLQVQMMTMGNRFVTPSMMMPLGPNYSQMGLAMGVGMQMGEQQFLPAHVLGAGLPGINDSADMLRFLNHPGLMPMQNSAPFIPTENCSPQSVPPSCAAFPNQIPNPNSLSNLDGATLHKKSRKTNR							AT3G62090	1
AT3G62420	AT3G62420.1	6.21	9	146	5.89552	0.00591436	1.66512	0.0155623	ATBZIP53 (BASIC REGION/LEUCINE ZIPPER MOTIF 53); DNA binding / protein heterodimerization/ sequence-specific DNA binding / transcription factor [AT3G62420.1]	MGSLQMQTSPESDNDPRYATVTDERKRKRMISNRESARRSRMRKQKQLGDLINEVTLLKNDNAKITEQVDEASKKYIEMESKNNVLRAQASELTDRLRSLNSVLEMVEEISGQALDIPEIPESMQNPWQMPCPMQPIRASADMFDC							AT3G62420			1
AT4G00050	AT4G00050.1	7.54	30	399	1.07004	0.636931	2.15052	0.00334238	UNE10 (unfertilized embryo sac 10); DNA binding / transcription factor [AT4G00050.1]	MSQCVPNCHIDDTPAAATTTVRSTTAADIPILDYEVAELTWENGQLGLHGLGPPRVTASSTKYSTGAGGTLESIVDQATRLPNPKPTDELVPWFHHRSSRAAMAMDALVPCSNLVHEQQSKPGGVGSTRVGSCSDGRTMGGGKRARVAPEWSGGGSQRLTMDTYDVGFTSTSMGSHDNTIDDHDSVCHSRPQMEDEEEKKAGGKSSVSTKRSRAAAIHNQSERKRRDKINQRMKTLQKLVPNSSKTDKASMLDEVIEYLKQLQAQVSMMSRMNMPSMMLPMAMQQQQQLQMSLMSNPMGLGMGMGMPGLGLLDLNSMNRAAASAPNIHANMMPNPFLPMNCPSWDASSNDSRFQSPLIPDPMSAFLACSTQPTTMEAYSRMATLYQQMQQQLPPPSNPK							AT4G00050
AT4G00120	AT4G00120.1	6.6	13	198	1.55163	0.0236786	-2.25446	0.406635	EDA33/IND (INDEHISCENT); DNA binding / transcription factor [AT4G00120.1]	MENGMYKKKGVCDSCVSSKSRSNHSPKRSMMEPQPHHLLMDWNKANDLLTQEHAAFLNDPHHLMLDPPPETLIHLDEDEEYDEDMDAMKEMQYMIAVMQPVDIDPATVPKPNRRNVRISDDPQTVVARRRRERISEKIRILKRIVPGGAKMDTASMLDEAIRYTKFLKRQVRILQPHSQIGAPMANPSYLCYYHNSQP							AT4G00120
AT4G00850	AT4G00850.1	6.31	14	223	2.06243	0.00686465	1.27972	0.0260973	GIF3 (GRF1-INTERACTING FACTOR 3) [AT4G00850.1]	MQQSPQMIPMVLPSFPPTNNITTEQIQKYLDENKKLIMAILENQNLGKLAECAQYQALLQKNLMYLAAIADAQPQPPAATLTSGAMTPQAMAPNPSSMQPPPSYFMQQHQAVGMAQQIPPGIFPPRGPLQFGSPHQFLDPQQQLHQQAMQGHMGIRPMGLNNNNGLQHQMHHHETALAANNAGPNDASGGGKPDGTNMSQSGADGQGGSAARHGGGDAKTEGK							AT4G00850	1
AT4G02450	AT4G02450.1	9.58	23	241	1.56927	0.000521471	-1.08447	0.201021	glycine-rich protein [AT4G02450.1]	MSRHPEVKWAETTEKIFLTVVLADTKDTKVNLDPEGVFDFSAKVGPENHVYELKLELADKVNVEESKINIGERSIFCIIEKAEPERWNKLLRVKKPPHYVKVDWDKWVDEDDEGSAGAADMDMAGMEGMGGMGGMGGMGGMGGMGGMGGMGGMEGMDFSKLMGGMGGMGGMGGLEGLGGMGGMGGMGGMGGMGGMEEFEDSDDEEETAKSGDKKDDAVKEEGLATEKAPAAEETTSVKEDK							AT4G02450		1
AT4G03120	AT4G03120.1	6.31	13	207	-1.07117	0.277916	-1.05659	0.621851	proline-rich family protein [AT4G03120.1]	MPRYYCDYCDTYLTHDSPSVRKQHNAGYKHKANVRIYYQQFEEQQTQSLIDQRIKEHLGQTGGYQQVGAVFNQHMLARPRPPMMLPPGSMPMGMRPPVLPRPMMPPQGYMPPPGVPQMMAPPGAPLPPPPQNGILRPPGMAPIPGQGGGPPGMAPIPGQGGGPPPNYNGLPPPPPYHTNPAAPPSGNFNNPNLNNPNPSAESPESNE							AT4G03120
AT4G06490	AT4G06490.1	6.21	9	146	1.70064	0.410674	-1.05905	0.847598	similar to unknown protein [Arabidopsis thaliana] (TAIR:AT5G29050.1) [AT4G06490.1]	MQVNLRCSESMLDFSRVGMMEEDIPNVPGRGTSPPHGYLRSQILALCVMIKGLLDRDQEIAMAFIKALAVQHQKRTMERRNIRKKINRMLLRVTAITRELHNLNSHPGDWIELGISKFARIPDCMMSNLDLAGQGVQVFCKSRRVS							AT4G06490
AT4G08395	AT4G08395.1	6.93	16	232	1.25647	0.632799	-1.63827	0.0573407	unknown protein [AT4G08395.1]	MESGIQPFSKGEYYGRGGEGWTCTVVVENCIQHLKKVRNMAEKESNMVVVETFSHPLEMDNSQKMWGVVDTFIQPSRKESSMVVVGSFRSMVVIETCSQPLGSTVVVVGSCRCIVVVETCSQTLEKESSMVDVRNSRRMVMMGSCRDMVVLKTCIETLEEDHSTVMVETCRRMVVVETCIQTLEKESSMLVVEKCRRMVVGKLCKLWITSSEFLVYDLTVHALHYLKLIMSL		Y					AT4G08395
AT4G12334	AT4G12334.1	6.25	7	113	-9.78721	0.00338042	-3.0384	0.00499116	pseudogene of cytochrome P450 family protein [AT4G12334.1]	MTRMMLGAIVEEEERTILGNELKKLILLFQISKEAQKYSYVMKEEEDFLQYLLRVIDDDEKAPLSMTHIKSLLMDMVLGGFDTSVKEPHIPRLLYLQAIMKETLPLSYSSSPE							AT4G12334		1
AT4G12860	AT4G12860.1	7.95	12	152	1.46611	0.115225	-1.0227	0.931549	UNE14 (unfertilized embryo sac 14); calcium ion binding [AT4G12860.1]	MDRGELSRVFQMFDKNGDGKIAKNELKDFFKSVGIMVPENEINEMIAKMDVNGDGAMDIDEFGSLYQEMVEEKEEEEDMREAFRVFDQNGDGFITDEELRSVLASMGLKQGRTLEDCKKMISKVDVDGDGMVNFKEFKQMMRGGGFAALSSN							AT4G12860	1
AT4G16030	AT4G16030.1	7.08	8	114	-1.47202	0.283281	-1.08615	0.903847	structural constituent of ribosome [AT4G16030.1]	MVSIHFHSRSRARRKCRHTGYGKDTMEALRRIMKRLTRRLKMLKRLLKKFCWNKKIDKLVYYHDMFMKVKGKVYKNKCVLMESMHKSSRERKFSGSEMRLALEPEGEKTASAPQ							AT4G16030
AT4G16980	AT4G16980.1	15.95	26	164	-40.3109	0.00100749	1.01494	0.851551	arabinogalactan-protein family [AT4G16980.1]	MASSFSSQAFFLLTLSMVLIPFSLAQAPMMAPSGSMSMPPMSSGGGSSVPPPVMSPMPMMTPPPMPMTPPPMPMTPPPMPMAPPPMPMASPPMMPMTPSTSPSPLTVPDMPSPPMPSGMESSPSPGPMPPAMAASPDSGAFNVRNNVVTLSCVVGVVAAHFLLV							AT4G16980	1
AT4G20440	AT4G20440.1	6.64	17	257	1.0152	0.912534	1.18399	0.0530108	SMB [AT4G20440.1]	MSMSKSSKMLQFINYRMRVTIQDGRQLVGKFMAFDRHMNLVLGDCEEFRKLPPAKGKKINEEREDRRTLGLVLLRGEEVISMTVEGPPPPEESRAKAGSAAAVAGPGIGRAAGRGVPTGPLVQAQPGLSGPVRGVGGPAPGMMQPQISRPPQLSAPPIIRPPGQMLPPPPFGGQGPPMGRGPPPPYGMRPPPQQFSGPPPPQYGQRPMIPPPGGMMRGPPPPPHGMQGPPPPRPGMPPAPGGFAPPRPGMPPHNQQQ							AT4G20440	1
AT4G22670	AT4G22670.1	6.59	29	441	-2.08135	0.00916271	-1.07789	0.239903	ATHIP1 (ARABIDOPSIS THALIANA HSP70-INTERACTING PROTEIN 1); binding [AT4G22670.1]	MDSTKLSELKVFIDQCKSDPSLLTTPSLSFFRDYLESLGAKIPTGVHEEDKDTKPRSFVVEESDDDMDETEEVKPKVEEEEEEDEIVESDVELEGDTVEPDNDPPQKMGDSSVEVTDENREAAQEAKGKAMEALSEGNFDEAIEHLTRAITLNPTSAIMYGNRASVYIKLKKPNAAIRDANAALEINPDSAKGYKSRGMARAMLGEWAEAAKDLHLASTIDYDEEISAVLKKVEPNAHKLEEHRRKYDRLRKEREDKKAERDRLRRRAEAQAAYDKAKKEEQSSSSRPSGGGFPGGMPGGFPGGMPGGFPGGMGGMPGGFPGGMGGMGGMPGGFPGGMGGGMPAGMGGGMPGMGGGMPAGMGGGGMPGAGGGMPGGGGMPGGMDFSKILNDPELMTAFS…							AT4G22670
AT4G32470	AT4G32470.2	7	7	101		-		-	ubiquinol-cytochrome C reductase complex 14 kDa protein, putative | chr4:15669219-15671194 REVERSE	MASLLKAFIDPKKNFLARMHMKAISTRLRRYGLRYDDLYDQYYSMDIKEAMNRLPREVVDARNQRLKRAMDLSMKHEYLPKDLQAVQTPFRGYLQDMLALG				Y		y	AT4G32470		2	1
AT4G33467	AT4G33467.1	8.91	9	102	337.51	0.00160356	6.16064	0.0229175	unknown protein [AT4G33467.1]	MEVSKRMDMLERRSSIETEPMTLHLDQLENAREEALYVMKTKTMEEAMDIFTKQETHEGLRASEERGGRCINLKDEEDDDDYEDERMMFMSPHAWDIHTAPF							AT4G33467
AT4G34590	AT4G34590.1	6.33	10	159	8.2562	0.00373123	3.27075	0.0018444	GBF6 (ARABIDOPSIS THALIANA BASIC LEUCINE-ZIPPER 11); DNA binding / protein heterodimerization/ transcription factor [AT4G34590.1]	MESSSSGTTSSTIQTSSGSEESLMEQRKRKRMLSNRESARRSRMKKQKLLDDLTAQVNHLKKENTEIVTSVSITTQHYLTVEAENSVLRAQLDELNHRLQSLNDIIEFLDSSNNNNNNNMGMCSNPLVGLECDDFFVNQMNMSYIMNQPLMASSDALMY	Y						AT4G34590
AT4G35070	AT4G35070.2	6.22	13	210		-		-	FUNCTIONS IN: molecular_function unknown; INVOLVED IN: biological_process unknown; LOCATED IN: cellular_component unknown; EXPRESSED IN: 11 plant structures; EXPRESSED DURING: 8 growth stages; CONTAINS InterPro DOMAIN/s: S-ribonuclease binding protein, SBP1, pollen (InterPro:IPR017066); BEST Arabidopsis thaliana protein match is: SBP1 (s-ribonuclease binding protein 1); protein binding / zinc ion…	MALSESHHQQQQSPSQSFLAAQMEKQKQEIDQFIKIQNERLRYVLQEQRKREMEMILRKMESKALLLMSQKEEEMSKALNKNMELEDLLRKMEMENQTWQRMARENEAIVQTLNTTLEQVRERAATCYDAGEAEVEDEGSFCGGEGDGNSLPAKKMKMSSCCCNCGSNGVTRVLFLPCRHLCCCMDCEEGLLLCPICNTPKKSRIEALIF							AT4G35070
AT4G37010	AT4G37010.1	6.02	10	167	1.57274	0.317616	1.10145	0.0723183	caltractin, putative / centrin, putative [AT4G37010.1]	MSEAAQLRRGLKPKGKTYGLTNQKRREIREIFDLFDIDGSGSIDASELNVAMRSLGFEMNNQQINELMAEVDKNQSGAIDFDEFVHMMTTKFGERDSIDELSKAFKIIDHDNNGKISPRDIKMIAKELGENFTDNDIEEMIEEADRDKDGEVNLEEFMKMMKRTSYG							AT4G37010
AT5G09876	AT5G09876.1	6.73	7	105		-		-	unknown protein | chr5:3079987-3080435 FORWARD	MEKIQSTKNESNKRRRREEMITEIEMEAAQQLMHLSDEEKNMDIIKKKKTIEEIFGKDDSHDQDQCTEEMVMLRVISSLKKEKKKKYRTIESIYMATRPIRVVIR							AT5G09876
AT5G19090	AT5G19090.1	7	41	587	-51.3197	0.000836561	-1.10589	0.0301948	heavy-metal-associated domain-containing protein [AT5G19090.1]	MSKEEFMKIQTCVLKVNIHCDGCKQKVKKILQKIEGVFTTKIDAELGKVTVSGNVDPSVLIKKLLKSGKHAEIWGAPKGGSNNNQNQPNLANQFKAMQIDHGGKGGGGGGGGPANNNKGQKIGGGGGGGGGGGGGGGGGPPKMVIPQLTPQQMQQLNPQQLQQLQQLQQMKGFQDLKLPPQLKGGPGPGPGSVPMNKNPQMPNNPNQKAVKFNVPDDDDEEDFSDEFDDEFDEDDDEFDDDLEDDEFDDHPPPPNKMKPMMGGGNMIMPNNMMPNMMMPNAQQMLNAHKNGGGPGPAGGKIEGKGMPFPVQMGGGGGGPGGKKGGPGGGGGNMGNQNQGGGGKNGGKGGGGHPLDGKMGGGGGGPNGNKGGGGVQMNGGPNGGKKGGGGGGGGGGGPMS…							AT5G19090
AT5G21990	AT5G21990.1	7.59	42	554	2.2285	0.00165541	1.06395	0.0576788	tetratricopeptide repeat (TPR)-containing protein [AT5G21990.1]	MFNGLMDPEMIRLAQDQMSRMTPADFARIQQQMMSNPDLMNMATESMKNMRPEDLKQAAEQLKHTRPEDMAEISEKMAKASPEDIAAMRAHADAQFTYQINAAQMLKKQGNELHSRGNFSDAAEKYLRAKNNLKEIPSSKGGAILLACSLNLMSCYLKTNQHEECIKEGSEVLGYDARNVKALYRRGQAYRDLGLFEDAVSDLSKAHEVSPEDETIADVLRDVKERLAVEGPGKASRGVVIEDITEENNVTSGENKKPSKEANGHAQGVKTDVDGLQALRDNPEAIRTFQNFISKTDPDTLAALSGGKAGDMSPDMFKTASSMIGKMSPEEIQKMVQTASSFKGDNPFAPTAPSTENGFTPTPDMLKLASDMMGKMSPEERERMFNMASSLKANAPAST…							AT5G21990	1
AT5G23550	AT5G23550.1	6.32	11	175	-3.80911	0.00118734	1.20278	0.0178856	similar to unknown protein [Arabidopsis thaliana] (TAIR:AT5G24170.1); similar to unnamed protein product [Vitis vinifera] (GB:CAO67095.1); contains InterPro domain SFT2-like (InterPro:IPR011691) [AT5G23550.1]	MDKMNQAIEKMKMLVGMEVEDEQQAADEESSLSFMEDLNRNCALTTKQRFYGFAICLSAGLTCTLLSMLVFFNPVKFGITFTLGNLMALGSTAFLIGPQRQVTMMLDPARIYATALYLASIIIALFCALYVRNKLLTLLAIILEFTGLIWYSLSYIPFARTMVSKIFMTCFDTEF							AT5G23550
AT5G26673	AT5G26673.1	6.06	6	100	1.29795	0.524363	-1.83175	0.16618	Encodes a Plant thionin family protein [AT5G26673.1]	MAANMWKTIMMIALIMIGCGLQACNGMNVDKSKPTMFNRFTCFRRCSITCSVDQSLDKTPCYKKCLNKCGLVLDSKPKPTSSSSSSSSSSSSSSSPPPTA		Y					AT5G26673		1
AT5G37860	AT5G37860.1	8.81	23	262	1.54955	0.0236064	1.72084	0.0011388	copper-binding family protein [AT5G37860.1]	MPRNVYEPLKTYFLKVNINCQGCKMKVKKTLRKIEGVYSVDIDTDQEAVIVRGNLDPEILVKKLNKRGKHAQLMFLTPYHKDQYFGNHQAVLNHDNRSLGNTQYNFGSNHNNVPSYERLNHQSDEEMMMMMNMKPVMMNDADYFEMSDSPEDFQELFGEIPQRHNNYEDVKPNLMRDMDLGYSNAYPAAETMNMQIGGRVNNMMVNERGFHGQMMNERGFHGQMMNGPSLVPQSMNHEQFSSRPVQSMNQQFSSRPVHGFYY							AT5G37860		1
AT5G39570	AT5G39570.1	9.87	38	386	4.77291	0.000240825	1.65466	0.0361291	unknown protein [AT5G39570.1]	MRLVILSHLVSMMISNTRDLNLLRSMSLLLTVMKLLTQSTVAILDPSHDPHFDPIQVVVVMFKVKDQILVMDLNPVMGGNRNLSTDLAMVDKRRWSMVGDLSRVMDLVMVEGRRLNRSMDLVVVEELRLSMVGDLNQGLDLVMVGDRSLSMSVSLAMEGLRNKKKVIGSLAMEDLKNKRKVTGSQVMEDLRSRKKDIESLAMEDLRRNKRKVIGSLAMEDLRNKRKEVTGNLVMGGLMIRWRVTLSLAMEDLRNRRREVTGSLVMGGLRNRKRGVTGSSLAMAVAMTMMMMSSVGTVLVLVMMRKGAMAARNMVAMTLMRMRRRRSTVTSITTRSVVTKTMSKLNPLCARECNENVCLLSLKNLLNKELSHIPFYIISSDVGVVFV							AT5G39570	1
AT5G41170	AT5G41170.1	6.27	33	527	4.18038	0.00154554	-1.77582	0.00446058	pentatricopeptide (PPR) repeat-containing protein [AT5G41170.1]	MAMRFFQLHRNRLVKGNSGKALSFSRLLDLSFWVRAFCNYREILRNGLHSLQFNEALDLFTHMVESRPLPSIIDFTKLLNVIAKMKKFDVVINLCDHLQIMGVSHDLYTCNLLMNCFCQSSQPYLASSFLGKMMKLGFEPDIVTFTSLINGFCLGNRMEEAMSMVNQMVEMGIKPDVVMYTTIIDSLCKNGHVNYALSLFDQMENYGIRPDVVMYTSLVNGLCNSGRWRDADSLLRGMTKRKIKPDVITFNALIDAFVKEGKFLDAEELYNEMIRMSIAPNIFTYTSLINGFCMEGCVDEARQMFYLMETKGCFPDVVAYTSLINGFCKCKKVDDAMKIFYEMSQKGLTGNTITYTTLIQGFGQVGKPNVAQEVFSHMVSRGVPPNIRTYNVLLHCLCY…		Y					AT5G41170	1
AT5G42325	AT5G42325.1	6.03	14	233	2.70154	0.0277501	2.44793	0.0494573	transcription elongation factor-related [AT5G42325.1]	MQRREFLELFEAALRAAKSVKGAESSPEVLRFVDAMNRLKEAPKSLVCDVVCKTSMGKGLGFFIDHKNPKIRSEGRILRDLWMKIHYASGREKSRDRETPVKIPTHSTMKKTGDSKRDKVHEILQSSLAKVATEVVDTEMKRRVMTVCDPWVVAVSVESAMSILFNMGDSNNPDLRRKVLIGEISGERLVKMEKDEMGSEKIQKEVQRIKERARFKEESRMKMLLASADMIMT							AT5G42325		1
AT5G42785	AT5G42785.1	8.77	10	115	1.60765	0.0143324	-4.31474	0.000914697	unknown protein [AT5G42785.1]	MKGRAYVMIFFFWALLTIITPMLVSWSQSLKNLPPLSNDQEQKIKDSGPRRMMGYSEEMHLAQEFVSHVEEEKLMMEPSMAPTPEDNHVMPSLSSLRIKQQEGLVAKRAHPMRLR							AT5G42785
AT5G44500	AT5G44500.1	7.11	18	254	1.09461	0.541724	1.2514	0.0207478	small nuclear ribonucleoprotein associated protein B, putative / snRNP-B, putative / Sm protein B, putative [AT5G44500.1]	MSMSKSSKMLQFINYRMRVTIQDGRQLIGKFMAFDRHMNLVLGDCEEFRKLPPAKGNKKTNEEREERRTLGLVLLRGEEVISMTVEGPPPPEESRAKSGSVTAVAGPGIGRAAGRGVPTGPLVQAQPGLSGPVRGIGGPAPGMMQPQISRPPQIIRPPGQMPPQPPFAGQGGPPPPYGMRPPYPGPPPPQYGGQQRPMMIPPPGGMMRGPPPPHGMQGPPPSRPGMPPPGGAPMFAPPHPGMPPAPPNHHNQQH							AT5G44500
AT5G46300	AT5G46300.1	6.76	14	208	1.55839	0.436784	-2.23439	0.182581	unknown protein [AT5G46300.1]	MDHGEMSTKETTTLKLIPGYENVMELEQRRQELKAVEKRMENVIGEKEIDDLNLTELIEFEKKLEDIQSLQLKKLEKIPWKDMIQPAKDLVVLNEYVKFKIGEMQARISMPQNDEFDIKMEVGKKEDLKGLKMRMKVFIGEKESEDIHLEELIEFSKKLEALHPKSVMHLDDMTEEIKDIFIMKEIVKKMIAKRDPNSSKTMIIQNYF			Y				AT5G46300
AT5G47410	AT5G47410.1	7.38	9	123	2.13384	0.000713341	1.09674	0.0523607	similar to hypothetical protein 25.t00068 [Brassica oleracea] (GB:ABD64961.1) [AT5G47410.1]	MTRPVSEDEVALMAKLLINMSIWLNERLGLNKSETSNDKKENSESVSYVDVSGEDVGNVAGPGDAAKMLLRGMVMVCGTVLQLMRRFGIRVNLRVMASKKFLMLLFLYVLFLVVKRVVTRMIW							AT5G47410
AT5G48485	AT5G48485.1	6.93	7	102	-1.12364	0.668395	-2.39885	0.00217868	DIR1 (DEFECTIVE IN INDUCED RESISTANCE 1); lipid binding [AT5G48485.1]	MASKKAAMVMMAMIVIMAMLVDTSVAIDLCGMSQDELNECKPAVSKENPTSPSQPCCTALQHADFACLCGYKNSPWLGSFGVDPELASALPKQCGLANAPTC							AT5G48485
AT5G49500	AT5G49500.1	6.85	34	497	1.17528	0.261977	-1.11654	0.375631	signal recognition particle 54 kDa protein 2 / SRP54 (SRP-54B) [AT5G49500.1]	MVLAELGGRIMSAIQKMNNVTIIDEKALNDCLNEITRALLQSDVSFPLVKEMQTNIKKIVNLEDLAAGHNKRRIIEQAIFSELCKMLDPGKSAFAPKKAKPSVVMFVGLQGEVLEKPQLVPSMLIIIRRKGYKPALVCADTFRAGAFDQLKQNATKSKIPYYGSYTGSDPVKIAVEGVDRFKKENCDLIIVDTSGRHKQQASLFEEMRQISEATKPDLVIFVMDSSIGQTAFEQARAFKQTVAVGAVIITKMDGHAKGGGTLSAVAATKSPVIFIGTGEHMDEFEVFDAKPFVSRLLGNGDMSGFVNKLQEVVPKDQQPELLEMLSHGKFTLRIMYDQFQNMLNMGPLKEVFSMLPGMRAEMMPEGHEKESQAKIKRYMTMMDSMTNEELDSSNPKVFN…							AT5G49500
AT5G55410	AT5G55410.2	7.34	8	110	-1.79794	0.593563	-1.0603	0.9445	protease inhibitor/seed storage/lipid transfer protein (LTP) family protein [AT5G55410.2]	MGKNNTKFLMQFATFAMVLTFAMMVKEATSMSICDMDINDMQKCRPAITGNNPPPPVNDCCVVVRKANFECLCRFKFYLPILRIDPSKVVALVAKCGVTTVPRSCQGIFM							AT5G55410
AT5G59030	AT5G59030.1	8.28	14	170	-2.15226	0.0117128	-1.42722	0.0308974	COPT1 (COPPER TRANSPORTER 1); copper ion transmembrane transporter [AT5G59030.1]	MDHDHMHGMPRPSSSSSSSPSSMMNNGSMNEGGGHHHMKMMMHMTFFWGKNTEVLFSGWPGTSSGMYALCLIFVFFLAVLTEWLAHSSLLRGSTGDSANRAAGLIQTAVYTLRIGLAYLVMLAVMSFNAGVFLVALAGHAVGFMLFGSQTFRNTSDDRKTNYVPPSGCAC	Y						AT5G59030		1	1
AT5G59040	AT5G59040.1	6.67	10	151	1.37111	0.326924	3.80105	0.0703018	COPT3 (Copper transporter 3); copper ion transmembrane transporter [AT5G59040.1]	MNGMSGSSPAAPAPSPSSFFQHRHRHGGMMHMTFFWGKTTEVLFDGWPGTSLKMYWVCLAVIFVISAFSECLSRCGFMKSGPASLGGGLLQTAVYTVRAALSYLVMLAVMSFNGGVFVAAMAGFGLGFMIFGSRAFRATSSNSHTEVQSHC	Y	Y					AT5G59040		1
AT5G61710	AT5G61710.1	8.44	13	155	1.85237	0.272913	-1.11812	0.134532	similar to unknown protein [Arabidopsis thaliana] (TAIR:AT4G02160.1) [AT5G61710.1]	MMKKKKKSSRGMHMFSVVMFMLRRRRTSNTRFWRRVVESVRKVRSEITIMPVTEMGGDDGDNEVDDRLSETMEVFTAPSSSSSSGISGYGSAMSLRDLDYPYDDDIDECYSDVQGGDDMIDEKAEEFIVRFYAQMKMQNQVYTDRCKAKGILMNF	Y	Y					AT5G61710
AT5G66815	AT5G66815.1	6.73	7	105	1.77685	0.0312418	-5.95871	0.00617468	unknown protein [AT5G66815.1]	MESFMGQKKTLYACYFLMLVFFLGFNCVHGRTLKVDDKINGGHYDSKTMMALAKHNDMMVDDKAMQFSPPPPPPPPSQSGGKDAEDFRPTTPGHSPGIGHSLSHN							AT5G66815
AT5G67060	AT5G67060.1	6.25	15	241	1.50039	0.0327977	-3.95954	0.0117461	HEC1 (HECATE 1); transcription factor [AT5G67060.1]	MDSDIMNMMMHQMEKLPEFCNPNSSFFSPDHNNTYPFLFNSTHYQSDHSMTNEPGFRYGSGLLTNPSSISPNTAYSSVFLDKRNNSNNNNNGTNMAAMREMIFRIAVMQPIHIDPEAVKPPKRRNVRISKDPQSVAARHRRERISERIRILQRLVPGGTKMDTASMLDEAIHYVKFLKKQVQSLEEQAVVTGGGGGGGGRVLIGGGGMTAASGGGGGGGVVMKGCGTVGTHQMVGNAQILR							AT5G67060	1
AT5G67390	AT5G67390.1	7.43	13	176	-4.17221	0.0147023	-4.14727	0.000524862	similar to unknown protein [Arabidopsis thaliana] (TAIR:AT1G69360.1); similar to unnamed protein product [Vitis vinifera] (GB:CAO71983.1) [AT5G67390.1]	MEKLLNPYDKQCMKMAMLKHEETFKQQVYELHRLYQVQKILMKNMEINKFTTKNNHVNSGLGTFIRRVDNEIDRPANFSGGNNNIEIMDESEIELTLGPSCYGGDEMMRMNKKKKKNSLPEMMDGSLNSGRRSFSSSSTGSSNNNNNNLEEQVRQERMMKHQKQQPWLQALTLNVI							AT5G67390
ATMG00500	ATMG00500.1	6.43	9	141		-		-	Symbols: ORF141 | hypothetical protein | chrM:130968-131393 FORWARD	MRQNMSILPPSSFSRNFLLVRCSPIQVWKYSMNTLCTMHGWMKLYLEYQRWNCMLRLSASIELEVFMDVPIFIRTYYRPANMDDSFRYGIIFRMYDLAVQLQWGNVMKLLLVTKTQVEKKKALNLNVSKTRDGRGGLNQQG		Y					ATMG00500			1
ATMG00650	ATMG00650.1	6.06	6	100		-		-	Symbols: NAD4L | Encodes NADH dehydrogenase subunit 4L. | chrM:188929-189231 REVERSE	MDLIKYFTFSMIISILGIRGILLNRRNIPIMSMPIESMLLAVNSNFLVFSVSSDDMMGQVFASLVPTVAAAESAIGLAIFVITFRVRGTIAVEFINSIQG		Y					ATMG00650	1	1
											12	11	12	3	1	7
1- two-week old plants were transferred to soil and allow to grow for an additional week, the plants were then withheld from watering for 10 days. After 10 d of water withholding, rosette leaves were collected from both wellwatered and drought-stressed plants in three biological replicates, frozen in liquid nitrogen, and stored at −80 °C until used for RNA extraction (Nishiyama et al., 2013).
2- 10-day-old plants grown on GM media were transferred onto 0.5 x MS plates without sucrose, containing either 0 mM (control) or 200 mM NaCl and maintained for a period of 24 h. Three independent experiments were performed for each condition. The samples were collected as three biological replicates (10 plants/replicate), frozen in liquid nitrogen and stored at 280uC until used for RNA extractio…
3- stress-responsive AtMRPs were defined as "a gene encoding MRP whose expression levels weere induced or repressed 2-fold or more with an FDR corrected p-value of less than 0.05

## Sheet: Table S2 (GmMRPs)
Table S2. Met-rich proteins encoded by soybean genome their expression response to drought in the leaves
Glyma ID	Met		Length (a.a)	V6 trifolia		R2 trifolia		DESCRIPTION	Sequences
	(%)	(#)		Fold change	q-value	Fold change	q-value
Glyma01g15910	8.08	8	100	3.63309	0.0452607	4.95553	0.0419261	no original description	QVGFEDVLRYFDEDGDGKVSPSELKHGLGMMGGELPMKEAEMAIATLDSDGDGLLSLEDFIALMEAGGEDCGFITPKRLKKMLKKMGESKSIDECKSMIK
Glyma01g15930	6.56	30	458	-20.3395	0.00679226	-3.86583	0.0148173	moderately similar to ( 278)AT4G00050| Symbols: UNE10 | UNE10 (unfertilized embryo sac 10); DNA binding / transcription factor | chr4:17863-19848 FORWARD no original description	MSQCVPSWDVEDNPPPSRVSLRSNSNSTAPDVPMLDYEVAELTWENGQLSMHGLGLPRVPVKPPTAVTNKYTWEKPRASGTLESIVNQVTSFPHRGKPTPLNGGGGGGVYGNFRVPWFDPHATATTTNTVTMDALVPCSNREQSKQGMESVPGGTCMVGCSTRVGSCCGGKGAKGHEATGRDQSVSGSATFGRDSKHVTLDTCDREFGVGFTSTSINSLENTSSAKHCTKTTTVDDHDSVSHSKPVGEDQDEGKKKRANGKSSVSTKRSRAAAIHNQSERKRRDKINQRMKTLQKLVPNSSKSDKASMLDEVIEYLKQLQAQLQMINRINMSSMMLPLTMQQQLQMSMMSPMGMGLGMGMGMGMGMGMDMNSMNRAHIPGIPPVLHPSAFMPMAASWDA…
Glyma01g32010	7.56	13	173	-1.15884	0.473833	1.45113	0.269385	weakly similar to ( 154)AT1G55170| Symbols: | similar to unknown protein [Arabidopsis thaliana] (TAIR:AT3G14750.1); similar to hypothetical protein [Vitis vinifera] (GB:CAN71449.1); contains InterPro domain Prefoldin (InterPro:IPR009053) | chr1:20584245-20585373 FORWARD no original description	GVGSRVDDRMALQRDLAASKEELHCMNMAIGDIRSDHEMHSRELVDKGMNMEADLRANEPLKNELIQLRAEVQKLNSLKQDLTTKVQTLTQDVSILQAKNQQIPMMRAEIDGLYQELIRARTMVDYEKKANIEFMEQRQSMEKNLVSMTREVEKLRAELASVDGRHWAVGMSX
Glyma01g32890	19.18	28	147	1.48235	0.139389	-1.90466	0.115117	no original description	MKELQKLVPNSSKTDKASMLDEVIQYMKQLQAQVQMMNWMKMYTTMMLPITMQQQQQQLKMSMMMAQMGMGMGMGMGMNKDMVMNMNSMNIPGIPPMLPFPPFMPMVSCGDQLQGTPEKSVTMDAYSKMASLYDQQLFHPPASSSKN
Glyma01g37980	7.39	15	204	-1.02889	0.940011	1.89454	0.15892	no original description	MYGQILDVVISFICNYCGRSLGAEEDYEKQATQNMKYQAEDAASRATETMKSAASGASDYASQKATDAKVIKMPTHSINNAKDTMGDTYEDAKQKMNTASDKVSSMAHNAKDNMEYGRDRAAMPMTRRNSMMPRTKQVMCMAKQGIKDKVAETFDQAKREVGEAYVSAKNTMTKEAKAKYEAAKEKASDATGDLGAKMRNTPNL
Glyma01g43240	6.13	13	213	1.25031	0.521732	2.2428	0.0376974	moderately similar to ( 337)AT4G23650| Symbols: CPK3, CDPK6 | CDPK6 (CALCIUM-DEPENDENT PROTEIN KINASE 6); calmodulin-dependent protein kinase/ kinase | chr4:12324977-12327425 REVERSEmoderately similar to ( 305)CDPK2_ORYSA no original description	MLRADPKQRLSAVEVLDHPWMREDGASDKPLDVAVLSRMKQFRAMNKLKKVALKVIAENLSEEEIIGLKEMFKSMDTDNSGTITFEELKAGLPKLGTKVSESEVRQLMEAADVDGNGTIDYIEFITATMHMNRMEREDHLYKAFEYFDKDRSGYITMEELESTLKKYNMGDEKTIKEIIVEVDTDNDGRINYDEFVAMMRKGKPDLVTNRRRK
Glyma02g00980	6.2	16	259	1.14603	0.466262	-1.42386	0.350567	weakly similar to ( 119)AT1G09530| Symbols: PIF3, POC1, PAP3 | PAP3/PIF3/POC1 (PHYTOCHROME INTERACTING FACTOR 3); DNA binding / transcription factor/ transcription regulator | chr1:3077218-3079369 FORWARD no original description	VSFGCVLTSHLHSLFSFNSLCKKSTVDIHQMIRTILHLVNVLSFLWFMNDEEPEDVVKEKPAREGTGVKRSRNAQVHNLCERKRRDKINKRMRILKELIPNCNKTDKASMLDDAIEYLKTLKLQIQMMSMDAGFCIPFMMLRNAAHHMMNTPLLHQLMGLGMGFRPDTAIPCSLPQFPITPLPAITDNRVHFFGFPNQVPPMPISHAPFIPMLGNPSTQTPLATSTAINLAENPASSQLTTLMASVPKNLYLTCQRQLL
Glyma02g01600	6.08	9	149	1.63617	0.0582244	1.21691	0.225957	weakly similar to ( 117)AT3G62420| Symbols: ATBZIP53 | ATBZIP53 (BASIC REGION/LEUCINE ZIPPER MOTIF 53); DNA binding / protein heterodimerization/ sequence-specific DNA binding / transcription factor | chr3:23102820-23103260 REVERSEvery weakly similar to (94.0)OCS1_MAIZE no original description	MASIQRPASSGSSEGGDPVMYERKRKRMESNRESARRSRMKKQKQLEDLTDEVSRLEGENARLAPSIKVKEEAYVEMEAANDILRAQTMELADRLRFLNSIIEIADEVGGESFEIPQIPDPLFMPWQIPHPMMATPPDMFFHGNEGLFA
Glyma02g01690	7.55	8	107	-1.25361	0.650711	1.54152	0.196064	weakly similar to ( 103)AT3G62580| Symbols: | similar to late embryogenesis abundant domain-containing protein / LEA domain-containing protein [Arabidopsis thaliana] (TAIR:AT1G72100.1); similar to hypothetical protein [Vitis vinifera] (GB:CAN73725.1); contains domain LATE EMBRYOGENESIS ABUNDANT (PLANTS) LEA-RELATED (PTHR23241) | chr3:23157907-23158711 FORWARD no original description	PRRTKRTPRNIRDERDDEIMKSQMGSSGPYMIGPFRIFQKERKSTKPMMNQRHKVERENNIGEESNPKLAAMNKKLGMIQGLSSLANIMSFGSLAIHSWYLAGKIDL
Glyma02g01790	6.82	9	133	-1.12985	0.853884	1.234	0.382415	no original description	SLKKGKRQKNFFKVALFMMRGRSRKSKMLAVDDESKSIWRKLVGSMRPLHLQSNQSPSHDIDNNNNNNNIPPHQSKMMKITSAPSENGDDGSRYASAVGLNEMVQEEEEEMIDAKAEEFIAQFYHQMRLQSLD
Glyma02g07520	6.13	13	213	-1.54081	0.134684	-1.28026	0.352527	no original description	MEAHSPVIAKKLWNVLRITFFMIRKGLVSKRKLIMDMNLMMKKGKLLRKSMSNFMSSHHHHHYSKSLARGYGMQEYEFSCSNSPNPVFFHVPKRKHHFNFPCMNTPEVVEEPNNRPVVLVPNNMTPEYTFNLRFDNINASDFAPGERKSPLLSSSSPFSVRISNYSSEDEENEEQEGGNGNGHVDDQAEDFIRRFYEQLRMQSRMQLLEYQEM
Glyma02g09550	6.04	22	365	-1.44474	0.120669	-1.62256	0.150079	nearly identical (1352)AT2G01830| Symbols: CRE1, WOL1, AHK4, WOL | WOL (WOODEN LEG) | chr2:363331-367428 REVERSEweakly similar to ( 157)ETR1_PRUPE no original description	MPFVQADSSTSRNYGGTGIGLSISKCLVELMGGQINFISRPQVGSTFSFTAVCGAFKKSSVTDKKENLEDLPSNFRGMKVIVVDGKPVRASVTRYHLKRLGILVKVANSISKAVALCGKTGSLTSGMFQPDIIMVEKDTWISGEDGIFNIWKQNGRMFKMPKMILLATNIISAEFDKAKATGFTDTVIMKPLRASMVAACLQQVLGMGKRRQLGKDMPNGFLHSLLYGKKILVVDDNGVNRRVAAGALKKFGADVKCAESGKAALEMLQLPHNFDACFMDIQMPEMDGFEATSRIRMMESKANEEMNNGNEWHVPILAMTADVIHATYDKCMKCGMDGYVSKPFEEENLYQEVAKFFKSKTMSDS
Glyma02g09580	6.8	14	207	1.03571	0.956174	1.04365	0.835074	weakly similar to ( 110)AT4G14540| Symbols: | CCAAT-box binding transcription factor subunit B (NF-YB) (HAP3 ) (AHAP3) family | chr4:8344659-8345144 FORWARDweakly similar to ( 103)NFYB_MAIZE no original description	SIIPFQQTDTYANTTIQPPINSNNGGPIPSLVLRDKSKMPITNVTKITGQILPNNAKISYDAMDMIQQGATKYINFVTRKAKEQCQSEYRKIMNAEDLLWAMKKLGFNDYVEPLTAFVQRYRNIEGSDLFTSHKEPIPHIENNEPRPNPMPTLEILHSPVPPPMNLVSVVQMMLSTMLMFPLSSNMINREMIMEEIQVQFNNYGNEL
Glyma02g09860	7.5	15	201	1.02132	0.908717	1.01469	0.95897	very weakly similar to (99.4)AT5G63470| Symbols: | CCAAT-box binding transcription factor Hap5a, putative | chr5:25433558-25434310 REVERSE no original description	FKSQQKLPLARIRRMMKSEPGVQMISSEIPMLMSKACEIFIQELTFRAWMHAEKNNKSIVQPCDVAKVIMQTDTMNFLTEIIPNNLGDFSVFDAKLKEMCLGVLQETCWLKYKAYLLLQEENIANIAEENEVSLSFTAGFMGNPMMKMDSVSKKKRMLETLWKETKLPYLTPLIGLNFIHMWHNQRWQNSTTRGDKTSWSG
Glyma02g10620	7.22	7	98	-44.6294	0.00672603	-4.04471	0.0528984	very weakly similar to (94.4)AT3G55240| Symbols: | Overexpression leads to PEL (Pseudo-Etiolation in Light) phenotype. | chr3:20484853-20485682 REVERSE no original description	MGESSNSSASYIHMVQHMIEKCLIFHMSKEECMEALSKHANIKPVITSTVWNELEKENKEFFEEYAKAKSKDERMSEEETSQMIQKMISDSSKGAGND
Glyma02g12990	6.48	21	325	1.20738	0.33466	1.02706	0.916913	moderately similar to ( 245)AT1G12700| Symbols: | helicase domain-containing protein / pentatricopeptide (PPR) repeat-containing protein | chr1:4322911-4326195 REVERSEweakly similar to ( 192)RF1_ORYSA no original description	LVTHLLLCCISRRWKNFFFFNLNVTAYSTVMDGLCKDGMVSEALDLFSQMCGKGIEPDLVTYTCLIHGLCNFDRWKEAAPLLANMMRKGIMPTLKTFNVTVDQFCKTGMISRAKTILSFTVHMGPEPDVVTYTSITSAHCMLNQMKDAMEVFDLMIRKGFSPSVVPYNSLIHGWCQTKNMNKAIYLLGEMVNNGLNPDVVTWSTLIGGFCKAGKPVAAKELFFIMHKHGQLPNLQTCAVILDGIVKCHFHSEAMSLFGEFEMSLDLSIIIYTIILDGMCSSGKLNDALELFSHLSSKGIKPNVVTYCTMIKGLCKEDSWMMPRTY
Glyma02g15000	6.52	12	185	-1.04223	0.936345	1.03572	0.947328	weakly similar to ( 186)AT2G15680| Symbols: | calmodulin-related protein, putative | chr2:6838106-6838669 FORWARD no original description	MSNTSLLDFQYSLSRKKYLRKPSRLFSWDRQNSGPKNVFPQPKADEMKQVFDKFDSNKDGKISQQEYKATMKALGMGDSVHEVPNIFRVVDLNGDGFINFKEFMEAQSKGGGVRMMDIQSAFRTFDKNGDGRISAEEVKEMLGKLGERCSIEDSRRMVRAVDTDGDGMVDMDEFTTMMTQSLRHV
Glyma02g31280	6.56	17	260	1.15402	0.657276	-1.34414	0.120344	weakly similar to ( 169)AT3G57660| Symbols: NRPA1 | NRPA1 (nuclear RNA polymerase A 1); DNA binding / DNA-directed RNA polymerase | chr3:21364723-21373791 FORWARD no original description	MLTTMDQNLRKKVKVMMKMMMVLLLKTLKGMKILDQMHKRENYKVLMRLIMRMVLKRKHMMVSCQEIEGDEDGSDVDVNENDNNIVQRTAKKFCLQNFGKVGECKAITCKESGVIYYGKDDRKGDEISAFEKEEIPALQTSGVHFKTFWELEDDLDVSQGDHHQGSTECFHISVNIRHLKLNADFMTHSGGYCLMNRTGSIADSTSLFIKMCFETAAKFIVEAAYHGQVDNLETPSARICIGLPVKMGTGCHDLIQKLEI
Glyma02g33860	7.26	9	125	1.01495	0.966491	-1.03908	0.940842	no original description	MESSMRLGYLMTVFAMSGSIVLLFYQVNKHLCNNFVKKFEFEIRGSMKHQTKKKVQFAKDVMEIPMEEKSDRINVARTQQVIDKVLFIDDVMKSKHEQKLKDAMPPNRAILYRGIMNDRKGRLGF
Glyma02g45830	6.05	17	282	1.46673	0.0547918	-1.33107	0.159112	weakly similar to ( 165)AT4G20440| Symbols: SMB | SMB | chr4:11022854-11023627 REVERSE no original description	MSMSKSSKMLQYINYRMRVTIQDGRQLVGKFMAFDRHMNLVLGDCEEFRKLPPAKGKKPAEGADREDRRTLGLVLLRGEEVISMTVEGPPPPEESRSKAVGAAALAGPGIGRAAGRGIPPAPVVQAQPGLAGPVRGVGGPAPGMMQPQISRPPQLNAPPVSYPGGGPPVMRPPGQMPGQFAPPPMARGPPPPMPPGQFAPPRPGGPPPQFQVPPPQFGQRPMGPPPPGQMVRGPPAPPRPGMPAPPPPRPGMPPPPGSGVPVFGPPRPGMPPPPNPPNQQQQ
Glyma03g04000	7.32	29	397	1.79336	0.126332	-1.95325	0.0816659	weakly similar to ( 138)AT4G00050| Symbols: UNE10 | UNE10 (unfertilized embryo sac 10); DNA binding / transcription factor | chr4:17863-19848 FORWARD no original description	MSQRVPNCDVDDNNNIPTTTKIPLLPNFNFISHEVPMLGYQAAELPCKKGQPSTYKGSHGNLTSTWDKPRTSGGTLESIVSQHVSENRYKLVTMDALVPCSEQQGTQKAVVSERLDACGKSRFPRVVAQEEVEKRAGVVARGTRGTTTLELGGCKDWSVSGSETCRRELSVTFNSATKGSPENTTSSGKQCTGTTTNDDRDSISHRISQGEVPDEDYKATKVDRSSGSNKRIKANSVVHKQSERRRRDKINQRMKELQKLVPNSSKTDKASMLDEVIQYMKQLQAQVQMMNWMKMYTSMMLPITMQQQQQQQQLKMSMMMAQMGMGMGMSKDMVMNMNSMNIPGFPPMLPFPSFMPMAPCGDQLQGTPEKSVTMDAYSTMASLYQQLFHPPASSSKN
Glyma03g24860	6.29	9	144	-1.12889	0.856834	-1.11663	0.790643	weakly similar to ( 105)AT2G38130| Symbols: ATMAK3 | ATMAK3 (Arabidopsis thaliana MAK3 homologue); N-acetyltransferase | chr2:15985717-15987223 REVERSE no original description	MWGRWGLRQRRGVVLAGVANAKAFHKGKYVGTMVCKMGEHHNTFRGYIAMLVVIKPYRGRGIEVSKILMVGAMLVTRSIKVMMESSCEEVCMRIYVTMCGCIALLILRLTLLSITSRLIQGQANKDQENDKASNKLFPRDQRLW
Glyma03g28190	6.02	15	250	1.17712	0.147193	1.40818	0.0306782	weakly similar to ( 193)AT1G01020| Symbols: ARV1 | ARV1 | chr1:7315-8666 REVERSE no original description	MGYRCIQCWCPVKTLYVQYSPGNIRLMKCENCKAVADEYIECEIMILVIDLILHKPKAYRHLLHNVINQETMKFHGLLWKLAVIFLLFESYRCLILESSKGKLGSSNSVSSLVSICWKVLMDVIIGNLMFLLTFFFMVKMFFHVSITISRCIDLLLTLMISSYFKIFLIAMMVWDFPSSVIFIIELFCLSSNAAALKVMTESTMRRCVWTCFSAYAIKFIVTRILELILLGQLMQGWSQMPFTFSKATMI
Glyma03g30350	9.09	12	133	-1.01532	0.978978	-1.14308	0.776073	weakly similar to ( 129)AT3G52270| Symbols: | ATP binding / RNA polymerase II transcription factor/ catalytic | chr3:19398158-19399880 REVERSE no original description	MDGKISMEGKILNKFDMRSHNQTLELYGKLYRERTNKYMVIENDSGAHMRPMPMMISFSTSGPSEKKAPTKPTDMKRTRRDHGKIEEIVFELFERQPNWSLRKLIQETNQPERMFERFMTLCLFMKKIPPEPM
Glyma03g32720	6.11	8	132	1.04609	0.893823	1.13834	0.692737	weakly similar to ( 107)AT5G26594| Symbols: ARR24 | ARR24 (ARABIDOPSIS RESPONSE REGULATOR 24); two-component response regulator | chr5:9269285-9270257 FORWARD no original description	MAHQNLGTKLTALVVDDNKINRKIHQKLLESVGMKNQGVENGQEAVDIHCHGQRFDLILMDMDMPIMNGIEATKELRSMGIGSMIVGVSSRCTEAEIRKFMEAGLNDYHEKPLNNSKLSSLLDKINPSFTRN
Glyma03g32730	6.54	7	108	1.08244	0.806855	-1.13667	0.616951	weakly similar to ( 124)AT5G26594| Symbols: ARR24 | ARR24 (ARABIDOPSIS RESPONSE REGULATOR 24); two-component response regulator | chr5:9269285-9270257 FORWARD no original description	MVHRKMLNSVGLKIQVAENGKEAVEIHRSGQSFDLILMDRDMPVMNGIEATKTLRSMGINSTITGVSTRSVTAHIREFMEAGLDDYLEKPLTLVKLTSIIHKMNKLIX
Glyma03g32740	6.04	29	481	-2.19366	0.00679226	-2.02202	0.0303245	weakly similar to ( 176)AT2G20180| Symbols: PIF1, PIL5 | PIL5 (PHYTOCHROME INTERACTING FACTOR 3-LIKE 5); transcription factor | chr2:8711606-8713318 REVERSE no original description	MELLWHNGQVVVQSQNQRSLRKLPPVTNSHDASPAGPSMTREIRPLVENFNQHLFMHEGEMASWLHYPIDDDEPAFMQTLGHTSQLTELRPMSANPRPPIPPPRRPEQRTPNFAYFSRHNTRAAEPSVKAAARESTVVDSCDTEAAASRVSETVRSAAEGGAGVAAPSTSAGGGRSTMMYDLTMTSSPGGSSSCDEPVQVAAAEEDRKRKGREAEEWECQSELQIPCTLVYANVRWVSDVGLREHSPRCCIYFGAVALCSFGTVITFTVVAAHVQAKKQVCGSTSTKRSRAAEVHNLSERRRRDRINEKMKALQELIPRCNKSDKASMLDEAISYLKSLQLQVQMMSMGCGMVPVMFPGIQQYMPAMGMGVGMGMGMEMGMNRPVMPFPNMLPGSALPA…
Glyma03g33290	6.21	18	291	-1.12102	0.821752	-1.33952	0.497906	moderately similar to ( 374)AT2G37330| Symbols: ALS3 | ALS3 (ALUMINUM SENSITIVE 3) | chr2:15676269-15677251 FORWARD no original description	MESNFFFKTNMLTLNHTLQHELVVPLVGTDWSWMMEFLKGMVKPVAATAVVCLAVALSFYQKLGLELEMVVAIVRAFIQLSIIGFVLEFIFRQDNAGWILLAYLFMVSIAGYTAGQRAKHVPRGKYVAGASILTGTAVTMLVLVALSVFPFTPRYIIPVAGMMVGNSMTVTGVTMKRLRDDIKTQMNLVETALSLGATPRQATHEQVKRALILALSPVVDNTKTVGLISLPGAMTGLIMGGASPLEAIQLQIVVMNMMIGAATVSSIMATYLCWPAFFTKAYQLETKVFSS
Glyma03g36290	6.09	7	116	-1.12381	0.870049	1.24712	0.701981	no original description	MAFSVHQVHKRILSKFMDIFECEMGGVLNAHGQKNLCGSEKHQAKKKVRFAKEALRNNSCRKGDKMIKIRLQRIKAEEIWVMKNVQKWRHGPKEDMMPPNRAVLYKGIMKYRKRSI
Glyma03g37570	7.53	11	147	2.22894	0.143594	1.08437	0.883956	very weakly similar to (85.5)AT2G47485| Symbols: | binding | chr2:19493074-19493499 FORWARD no original description	MEGISMGLKKYWRRSIRGYQRLHVSDRRKKETVQLGGCQRRWRWRIKMAPKMRIHKISSPKKLVLWVRDAYVRMMLGIANSMGAFAVGYGGDAASTAKGGFERAPPPKEYDQRMIMHMYKSLIMAQGQLLPRDPTPKHATTTMVTTF
Glyma03g40690	6.08	9	149	1.30653	0.424849	1.47295	0.252361	weakly similar to ( 161)AT2G27030| Symbols: CAM5 | CAM5 (CALMODULIN 5); calcium ion binding | chr2:11539797-11540138 FORWARDweakly similar to ( 158)CALM3_PETHY no original description	MKEALREEQIGEFLEAFCLFDKDGDGCITIEELSTAIRSLDENPTVEELQIMMNEVDMDGNGTIEFGEFLNLMARKMKETEAEEELKEAFRVFDKDHDGYISPSELRSVMRTIGEKVTDEEVEQMVKEADLDGDGLVDYEEFVRMMLAV
Glyma03g40930	6.25	14	225	1.16432	0.774747	1.44528	0.370922	weakly similar to ( 103)AT5G28640| Symbols: GIF, GIF1, AN3 | AN3 (ANGUSITFOLIA3) | chr5:10647835-10649624 REVERSE no original description	MQQHLMQMQPMMAAYYPNNVTTDHIQQYLDENKSLILKIVESQNSGKLSECAENQARLQRNLMYLAAIADSQPQPPTMPGQYPPSGMMQQGAHYMQAQQQTQQMSPQQLMAARSSLLYAQQPYSALQQQQAMHSALGSSSGLHMLQSEGSNVNVGSGSGSVGGGFPDLVRGGGGGGGSTGEGLHSGGRGIMGSSKQEIGGSSEGRGGGSSEGGENLYLKIADDGN
Glyma03g42010	6.4	8	126	-2.12337	0.0480109	-1.23434	0.0287112	weakly similar to ( 140)AT2G46600| Symbols: | calcium-binding protein, putative | chr2:19143141-19143548 FORWARD no original description	MESNQSAKEITVEVEEFEDLLPVMAEKLDVETFVSELCGGFKLLADPETGLITGESLMRNSAMLGMDGMSKEEAETMVRQGDLDGDGKLNETEFCILMVRLSPGIMEDAETWLHKALEQELTKSST
Glyma04g02290	7.1	13	184	-1.06403	0.887794	-1.01452	0.964258	moderately similar to ( 266)AT1G20300| Symbols: | pentatricopeptide (PPR) repeat-containing protein | chr1:7029691-7031304 FORWARD no original description	NILKRLGGSADTISYNFIIESHCRDENPEEAVKVLNLMVTKGVAPNASTFNFIFGCIAKLHDVNGAHWMYARMKELKCLPNTLTYNILMRMFAKSRSTDMVLKMKKEMDENQVEPNVNTYRILISMFCEMKHWNNAYKLMKEMVEEKCLRPNLSVYELVLELLRKAGHLKKHEELVDKMVARGF
Glyma04g03920	6.06	14	232	-1.34061	0.135819	-1.89292	0.243864	moderately similar to ( 266)AT5G42680| Symbols: | similar to unknown protein [Arabidopsis thaliana] (TAIR:AT4G39610.1); similar to unnamed protein product [Vitis vinifera] (GB:CAO61286.1); contains InterPro domain Protein of unknown function DUF617, plant (InterPro:IPR006460) | chr5:17131868-17132584 FORWARD no original description	MPSVHSSPGYSMENPALASLLRHTTGENKRSNKLSSGGGLLKMLKLFPMLSSGCKMVALLGRPRKMLKDSATTGTIFGYRKGRVSLAIQEDTRQMPVFLIELPMLASALNKEMASDIVRIALESETKSNKKKLLEEYVWAVYCNGRKVGYSIRRKQMSDDELHVMQHLRGVSMGAGVLPTSSDHKDCDGEMTYMRARFERVVGSKDSEAFYMINPDSTAQGPELSIFFVRPH
Glyma04g04190	6.94	15	217	-1.01823	0.976251	1.08863	0.815599	weakly similar to ( 123)AT3G50330| Symbols: HEC2 | HEC2 (HECATE 2); DNA binding / transcription factor | chr3:18668405-18669100 REVERSE no original description	MEQLKPEEYQMDVMTMMLQQLPQLSEPYTHTMEGFHPPEDHFYEQQQHSPSETYEDANANPYGGEKRSSMAAMREMIFRMAAMQPIHIDPESVKQPKRRNVKISKDPQSVAARHRRERISERIRILQRLVPGGTKMDTASMLDEAIHYVKFLKTQVQSLQRASSANNNIRPLGTSTVNATGIGFPVAMSTTSNSTPYFPLPKPYQARHMENMHDRYD
Glyma04g08230	6.29	10	160	1.18873	0.462931	-1.25094	0.295127	no original description	MKKRKELGHGSPSISPPPKSRRLELERDVMMEEEENVMVKQPCVDPTPSPVTDMEERAIVLYEPTATTPFLKSPSSPEFSIVIKSDLIPGLKDYLLSWGIAKQDDPVEDEMRREKSSEMSNDCLAVVPWVAFHSPMTCEEIVPETGQPLEVEEGDMMEMD
Glyma04g17650	7.14	10	141	-1.01485	0.973696	2.34498	0.0600083	weakly similar to ( 110)AT3G50770| Symbols: | calmodulin-related protein, putative | chr3:18884968-18885585 FORWARD no original description	MRVNTEFERVLKYFDEDGDGKISPSELRNRLGMMGGVLLFKDAEKLIEELDSDGDGFLSLEDFVKIMEAAGEEEKLKDLAEAFEMYHDSEMFGFITPKSLQKMLGRLGESKSMEQCTAMIGHFDLNGDGLLSFDEFRVMMQ
Glyma04g17660	6.94	10	145	-1.16463	0.684054	-1.14628	0.676585	no original description	MRVNTEFERVLKYFNEDGDGKISPSELRNRLGMMGGELLFKDAEKLIEELDSDGDGLLSLENFVKIMEDAGEEKLKDLAEAFEMYRNTEMYGFITTKSLQRMLRRLGESKSMEQCTTMIDHFDLNGDGLLEINMILKCMILTNNK
Glyma04g17710	7.14	10	141	1.09237	0.819792	-1.25034	0.353061	weakly similar to ( 104)AT3G50770| Symbols: | calmodulin-related protein, putative | chr3:18884968-18885585 FORWARD no original description	MRVSAEFERVLKYFDEDGDGKISPSELRNRLCMMGGELLFKDAEKLIEELDSDGDGFLSLEDFVKIMEAAGEDEKLKDLAEAFEMYHDTEMLGFITPKSLQRMLNRLGESKSMEQCRAMIGHFDLNGDGVLSFDEFGVMMQ
Glyma04g23050	6.79	11	163	1.13744	0.66053	-1.07739	0.905494	weakly similar to ( 182)AT1G26170| Symbols: | protein transporter | chr1:9047526-9054425 REVERSE no original description	IIRIMLLLALNDPHKKICTTIGMVVASIAMHDWLELWPDLLPFLLNLINNQTNMNGVHGAMRCLVLLSMDLDDKMVPKLIPTMFSSFLKIVSSPQIYDPYIRIKALSIIYSCTSILGTMSGVYKEETSSLIVPLLKPWMGQFSFILQIPVQSENPDDWSIKME
Glyma04g36830	6.23	24	386	-1.10807	0.822018	1.4142	0.142759	weakly similar to ( 114)AT4G38180| Symbols: FRS5 | FRS5 (FAR1-RELATED SEQUENCE 5); zinc ion binding | chr4:17906696-17909398 REVERSE no original description	MWMMRKMRQNRMMAKRMMLFMSMQDMTMLGDIYSFDFANLTFDVLESLEFVDIEIAFEFYNWLGNVVKNVNGETLQQTFVCSRARFHKQNGLTLETKRRKQCSVFMFTLLLMLDAKRCLLLPARRKMTTTDIIKIQNFQKVRIRPSHMYEKRFIIKLRDKDENTSLMCKNRMLYVSYSVDDDNNLPHLFWCDAMNGKAPSSVITDGDVAMNNAIRRVFPNAFHRHCAWHLIRNAQSHLKNTDILPFLKRLMLIELEASEFEQKWNEMVSRFGLQDNTWLNELYVKRRMWSPAHICGNFFAGIRMASRCEALHDHIGKYVDSRTNLIDFVEQFHRCLTFFRYREIEVDYFDYGDVIVETNFHSMERSAGQILTNELFLAFQSCLKKT
Glyma04g37040	7.91	11	140	15.0279	0.0117566	40.0782	0.00534611	very weakly similar to (94.7)AT1G76650| Symbols: CML38 | CML38 | chr1:28771803-28772336 REVERSE no original description	MGKQVGFEDVLRYFDEDGDGKVSPSELKHGLRMMGGELLMKEAEMAIAALDSDGDGLLSLEDLIALMEAGGEEQKLNDLKVAFEMYDTEGCGFITPKSLKRMLKKMGESKSIDECKAMIKQFDLNGDGVLSIEEFRIMMQ
Glyma04g40100	6.21	9	146	-1.14338	0.433073	1.01749	0.978155	weakly similar to ( 177)AT3G56380| Symbols: RR17, ARR17 | ARR17 (response regulator 17); transcription regulator/ two-component response regulator | chr3:20916459-20917347 FORWARD no original description	MAASSSSNWVMESGDVPHVLAVDDNLIDRKLVEKLLRNSSCKVTTAENGPRALELLGLTSGGQNNMNGRSKVNMIITDYCMPGMTGYELLKKIKESSVMKEVPVVIMSSENIPTRINKCLEEGAQMFILKPLKQSDVRKLTCQLMN
Glyma04g41260	6.83	11	162	-1.14327	0.75251	1.00073	0.997637	weakly similar to ( 171)AT5G24314| Symbols: PDE225, PTAC7 | PDE225/PTAC7 (PIGMENT DEFECTIVE 225) | chr5:8277753-8279102 FORWARD no original description	MAIRINSLTLSSALPKMELRGGISGLWVGSQMMPQMRKEARGRRVWRRRKLIKKDEYMHPKMERIPFMEEQVRMVREQGKLLTMDIERLMLSEDNRFDFVNEIAAEANSYVENNRDEYGGEKKAILHVLSNRMNDTGIYRPEAYYESDPFKPGPHYLREEFT
Glyma04g42020	6.25	19	305	1.36085	0.64546	1.25299	0.335679	moderately similar to ( 277)AT3G21470| Symbols: | pentatricopeptide (PPR) repeat-containing protein | chr3:7563752-7565080 FORWARD no original description	MGTSRRAMSLRLRLFFDWVPVRNLEIWNSMIAGYVQNGFGEKALQAFEGMGAEGFEPDEFTAVSVLSACAQLGNLDVGKQIHHMIEHKGIVVNPFVLSGLVDMYAKCGDLVNAMLVFEGFPEKNIFCWNAMISGFAINGKCKEALEFFGRMEESNIRPDGITFLTMLSACAHGGLVSEALEVISKMEGYRIEIGIKHYGCMVDLIGQMRMAMKPNDTVFGGMLGACRIHSDMKMAEQVMKLICEDPVTGASSHNVLLSNIYAASEKWEKAERMKSIDGGSQRIPGCSSIIFSDFCGFKCTSPTLK
Glyma04g43590	6.23	16	258	1.60256	0.103861	-1.58293	0.0502549	moderately similar to ( 428)AT1G35510| Symbols: | similar to unknown protein [Arabidopsis thaliana] (TAIR:AT2G01480.1); similar to unnamed protein product [Vitis vinifera] (GB:CAO49921.1); contains InterPro domain Protein of unknown function DUF246, plant (InterPro:IPR004348) | chr1:13071464-13074653 FORWARD no original description	MVDRMVKYSSHSGGKYVSVHLRFEEDMVAFSCCEYDGGEEEKHEMDIARERSWRGKFRRKHRIIKPGANRVDGRCPLTPLEVGMMLRGMGFDNTTSVYVAAGKIYKEQKYMAPLKQMFPRLQTKNTLATPEELAQFMGHSTRLAALDYTVCLHSEVFVTTQGGNFPHFLMGHRRYMYGGHAKTIKPDKRRLALLFDNPNIRWEVFKQQMKDMLRHSDQKGTELKKAGESLYTFPMPDCMCRQAEPKSENGNTTKYMKL
Glyma05g03240	10.79	15	140	-1.17456	0.593785	-1.06391	0.906247	weakly similar to ( 108)AT1G76650| Symbols: CML38 | CML38 | chr1:28771803-28772336 REVERSE no original description	MMRGEEYERVLRYFDEDGDGKISPSELRNRISMMGGEVMLKEAEMAIEALDSDCDGLLCLEDLMKLMEAAGEEEKLKDLREAFNMYDMERCGFITPKALKRMLKKLGESKSMDECKVMISRFDLNGDGMLSFEEFRIMMK
Glyma05g04620	7.58	10	133	1.01644	0.96094	1.74521	0.173118	weakly similar to ( 112)AT3G13200| Symbols: EMB2769 | EMB2769 (EMBRYO DEFECTIVE 2769) | chr3:4242246-4243983 FORWARD no original description	MTTAARPTWAPAKGGNEQGGTRIFGPSQKYSSRDIASHTTLKPRKEGQDTQDELKRRNLRDELEDRERRHFSSKNKSYAICFWKVPRETLKIALLLVVLMQMILTLKSKVMMTVMKMMMMRMTLKHCWLSLNK
Glyma05g19920	6.84	16	235	1.00454	0.993321	1.32421	0.463822	weakly similar to ( 137)AT5G67060| Symbols: HEC1 | HEC1 (HECATE 1); transcription factor | chr5:26783502-26784227 FORWARD no original description	MDVDIVKTSSNNNNMDVMAMMMQMENIVTTTPPPTTTLVDPTPSNVVQFSKIDDLFQHQHQQQPMSQSLQPYPSEKKNSMAAMREMIFRIAVMQPVHIDPESIKPPKRRNVKISKDPQSVAARHRRERISERIRILQRLVPGGTKMDTASMLDEAIHYVKFLKKQVQTLEQAGANTSPHSNTNSPNNHVVGAAGFPLGMSSNYSNNSSVNYSSLLMKGGCQPCQMFGSTSKQLLS
Glyma05g24190	6.25	9	145	-1.51864	0.0210979	-1.3692	0.301953	weakly similar to ( 142)AT4G35850| Symbols: | pentatricopeptide (PPR) repeat-containing protein | chr4:16983641-16986684 FORWARD no original description	MKFLQSLIAQSRYAARTRPLNRVSGLRFFSVSTEEYSKRNYANNVAEYNTVLGSLTAQRRNFLLRDVYDDMMLDGVKPTRDTFHSLVVGTMKGARMQDAFYFVEQMKIMGLLPDVCTFCFFILSLYNFLFLGMFGMMLVIKIIEC
Glyma05g28600	6.59	11	168	-1.041	0.928708	1.45392	0.0760108	no original description	MGVVVGRGRMLRRMVFLKKKRKVAKGMEKKAWRILANQLGQLREMETRFEQREVERERERQRRENLRVELDKQWERKLEEREKEREEREKERDKLRRQRMAEWEAMEKENEEMERKRREEELIHEREWEERMNCRRLEWKKRVDEMLSQHRAEMGQMQTLACPTFWPI
Glyma05g28960	6.79	11	163	-1.73443	0.140774	1.05037	0.902806	weakly similar to ( 109)AT1G75390| Symbols: ATBZIP44 | ATBZIP44 (ARABIDOPSIS THALIANA BASIC LEUCINE-ZIPPER 44) | chr1:28295885-28296326 FORWARD no original description	MASPGGSGTYSSGSSSLQNSGSEGDRDIMEQRKRKRMLSNRESARRSRIRKQQHLEGLSAQLDQLKKENAQINTNISITTQMYLNVEAENAILRAQMGELSNRLNSLNEMISFINSTNNNCLMMFDEAQETTTQLFNDCGFMDYAWNGIPIMASADNEMLIMY
Glyma06g04020	6.09	14	231	1.31489	0.508331	-1.51802	0.16624	moderately similar to ( 251)AT5G42680| Symbols: | similar to unknown protein [Arabidopsis thaliana] (TAIR:AT4G39610.1); similar to unnamed protein product [Vitis vinifera] (GB:CAO61286.1); contains InterPro domain Protein of unknown function DUF617, plant (InterPro:IPR006460) | chr5:17131868-17132584 FORWARD no original description	MPSVHSSPCYSMENPALASLLGQTRGENKRSKLSSGGGLLKMLKLFPMLSSGCKMVALLGRPRKMLKDSATTGTIFGYRKGRVSLAIQEDTRQMPIFLIELPMMASALNKEMASDIVRIALESETKSNKKKLLEEFVWAVYCNGRKVGYSIRRKQMSDDELHVMQHLRGVSMGAGVLPTSSDHKDCDGEMTYIRASFQRVVGSMDSQALYIINPDATAHGPELSIFFLRPH
Glyma06g04380	6.95	18	260	-1.05161	0.955609	1.23699	0.387869	weakly similar to ( 128)AT3G50330| Symbols: HEC2 | HEC2 (HECATE 2); DNA binding / transcription factor | chr3:18668405-18669100 REVERSE no original description	MEQQHMDMMTMMMLQHLPEFSEPYTHTMEGFHPPSEEFCGNNNNNIRNTMQLADLIDNNNPLSPIPWSSSYSFTHLPASTTEISFSNNSHPTTPIMLQEHEQQYEGANANPYGGEKRNSMAAMREMIFRMAAMQPIHIDPESVKAPKRRNVKISKDPQSVAARHRRERISERIRILQRLVPGGTKMDTASMLDEAIHYVKFLKTQVQSLERASSANNNIRPLNAAGQIGFPGAMGRNYVGGVWNTCTAIMGWSLVWVSEA
Glyma06g07000	6.1	10	165	1.17507	0.770837	1.21543	0.433014	moderately similar to ( 237)AT2G25310| Symbols: | carbohydrate binding | chr2:10784515-10786202 REVERSE no original description	MGVGTKDYILPGKISNVKVILNGGQRVTFLRPDGYFAFHNVPAGTHLIEVAAIGYFFSPVRVDVSARHHGKIQAALTENRRGLSEFVLEPLKDEQYYEVREPFSIMSIVKSPMGLMMGFMLIVVFLMPKLMENMDPEEMRRAQEEMRNQGVPSLASLLPGAARSN
Glyma06g08300	8.24	14	171	1.0819	0.805317	1.06487	0.874036	no original description	MKKRKELGHDFPPISPPPKSRRLEWERDLLCSTTMMMMMMMEEEENAMVDQPCVDPTPASVTDTEERAIVLYEPTATTPFLKSPSSPEFSVVIKADLIPGLKDYLLSWGIAKQDDPVEDEMRREKSSEMSTNDCLAVVPWVALHSPMACEEIVPETGQPLEVEEGDMMEMD
Glyma06g13590	6.21	9	146	-1.01863	0.941845	-1.02156	0.966966	weakly similar to ( 179)AT5G24314| Symbols: PDE225, PTAC7 | PDE225/PTAC7 (PIGMENT DEFECTIVE 225) | chr5:8277753-8279102 FORWARD no original description	MELRGGNSRLWVSSQMMPQMRKEARGRRVWRRRKLIKKDEYMHPKMERIPFMEEQVRIVREQGKLLTMDIERLMLSEDNRFDFVNEIAAEANSYVENNRDEYGGEKKAILHVLSNRMNDTGIYRPEAYYEPDPFKPGPHYLREEFT
Glyma06g17950	8.39	12	144	1.6913	0.457253	1.95389	0.0979332	very weakly similar to (97.4)AT1G76650| Symbols: CML38 | CML38 | chr1:28771803-28772336 REVERSE no original description	MHYNMGKQVGFEDVLRYFDEDGDGKVSPSELKHGLGMMGGELPMKEAEMAIAALDSDGDGLLSLEDFIALMEAGGEEQKLNDLKVAFEMYDTERCGFITPKSLKKMLKKMGESKSIDECKSMIKQFDLNGDGVLSFEEFRIMMQ
Glyma06g21850	7	7	101	1.16973	0.620118	1.09564	0.0605344	weakly similar to ( 147)AT5G07960| Symbols: | Identical to UPF0139 protein At5g07960 [Arabidopsis Thaliana] (GB:Q9SD88); similar to unknown [Populus trichocarpa] (GB:ABK93624.1); contains InterPro domain Protein of unknown function UPF0139 (InterPro:IPR005351) | chr5:2542351-2543254 FORWARD no original description	MSSNPNDPRQPSAARPYVAPQISPQDLPIDYAGFIAVIFGVAGVMFRYKLSSWLALIFCAQSVANMRNVENDLKQVMMAMMFSLMGLITNYFGPPRPGKQS
Glyma06g28660	6.01	11	184	-1.07879	0.85677	-1.04392	0.902942	no original description	HNKCCDELNEGHSRQRIDLKAGGKRKNTERTTPKSNDIYLKLLVKIPQINQGFLEMIMRVEKWVKLGSGESIIKLDLGTQNTWELMLQCMNRKTTAQGMETVMKKKRKRRRVVLIWSAVMRLYRQIPIIMFQMCYFLVVDNTSIPIMVDIANLEPTNIINRVFVIFEGHGRSFSIGQYDLLMYT
Glyma06g39910	10.34	12	117	3.12478	0.0673002	4.1373	0.0131259	weakly similar to ( 107)AT4G27280| Symbols: | calcium-binding EF hand family protein | chr4:13663776-13664168 REVERSE no original description	MEIDYGFDFEDCFPSMIARLGAEGFIGELCNGFQLLMDVNMGLITFESLKMSTNLLGLEVRDDELLCMLMEGDLDGDGALNQMEFCILMFRLSPCLMDMQGMVPVNHVNGLMSYNVV
Glyma06g46490	7.76	45	581	-1.06414	0.802626	1.38722	0.117096	highly similar to ( 570)AT5G21990| Symbols: | tetratricopeptide repeat (TPR)-containing protein | chr5:7273398-7276321 FORWARD no original description	MFNGMMDPDLMRIAQEQMSRMSPAELARIQQQMMSNPELMRMASESMKNMSSEDFKLAAEQLKHTRPEEMAEIGEKMANASPEEVAAMRSRVDAQIKYQLSAAEMLKKQGNDLHNQGRYNDALKKYILAKENIKEVPSFQSRKLLLACSLNLMSCYLKTRQYNECVKEGSEVLAYDAKNLKALYRRGQAYKELGLLKDAVSDLSMALEVSPDDDTIAELLRDAKEKLAMDGGEHAPGRLVIEEITEDVPSGSSSLEQTVVQPKKSGDSSKSYSTANNGNPKTNADSLDALKKDPEAVRSFQNFISNTDPDMLASLNAGQFKDVSPDMIKTTSDMVSKMSPEELQRMLDMASSFQGDNPFFRGGSPDSSFNPGSMPPNVTPDMFKAASDMISKMPADELK…
Glyma07g00720	7.95	12	152	-1.24657	0.432528	1.01872	0.962565	no original description	MLQSDLGRIKMHGNYNMSMSAMEDDAACSRSFMCCAKQSPQKSIHEERAQEKKNKGSSQLSIKEDLKSQNMMNKKAHVLEQKMKAMDMMNAGDLEHVLDIEEALHYYSRLQSPVYLDIVDKFFKDMQSELSVPQPCVSLKPSKERLGPIRLR
Glyma07g02800	6.01	11	184	-1.04825	0.89779	-1.05439	0.907433	moderately similar to ( 206)AT1G80760| Symbols: NIP6;1, NLM7, NIP6 | NIP6;1 (NOD26-like intrinsic protein 6;1); water channel | chr1:30355532-30356907 REVERSEweakly similar to ( 132)LSI1_ORYSA no original description	MLHRPHLRSSSQPAVTISFAVIKHIPWKNVPVYIGAQVLASVSAAFALKLIFHPFMSGGVTVPSVGYGQAFAAEFMVSFTLMFVVTAVAGGTRVMREFPGIIMVQVREFPGMMVGATVMINILMAGAATGSSMNPARTLGPAIAAHNYKGIWIYLTAPILGSLCGAGAYTVLKLPDRNTTMQEE
Glyma07g03290	7.09	35	495	-1.02511	0.928957	1.6616	0.0959422	highly similar to ( 830)AT1G48900| Symbols: | signal recognition particle 54 kDa protein 3 / SRP54 (SRP-54C) | chr1:18088699-18091411 REVERSEhighly similar to ( 781)SR542_HORVU no original description	MVLAELGGSISRALQQMSNATIIDEKVLNDCLNDITRALLQSDVQFKLVRDMQTNIKNIVNLEDLAAGHNKRRIIQQAVFNELCKILDPGKPSFTPKKGKTSVVMFVGLQGSGKTTTCTKYAFYHQKKGWKPALVCADTFRAGAFDQLKQNATKAKIPFYGSYMESDPVKIAVEGVERFKQENCDLIIVDTSGRHKQEAALFEEMRQVSEATKPDLVIFVMDSSIGQAAFDQAQAFKQSVAVGAVIVTKMDGHAKGGGALSAVAATKSPVIFIGTGEHMDEFEVFDVKPFVSRLLGMGDWSGFMDKIHEVVPMDQQPELLQKLSEGNFTLRIMYEQFQNLLKMGPISQVFSMLPGFSAELMPKGREKESQAKIKRYMTMMDSMTNEELDSSNPKLMNES…
Glyma07g04690	6.1	69	1132	1.09071	0.629576	-1.16826	0.0703115	highly similar to ( 602)AT1G72390| Symbols: | similar to unnamed protein product [Vitis vinifera] (GB:CAO45587.1) | chr1:27249117-27254880 FORWARD no original description	MSLENIVKDIPSITDKSWTYGDLMEVESKILKALQPKLHLDPTPKLDRLCESPLPTKLNLPRKRLKNMPEFAVTSTNKIHGKKVCIDRVQESSINRLGDVGNTASNAIVQQTHENPAMQNLSPNVAMALRSKNFIPDSSIPNFPMMSHQSRYSMAVGTQRSLQEQGPTPSINSLGASPATQDVMISYAENANSGASLLGKRDNQDGQASPLSNIAKRMRPASTVLDAMQHQQIGSHVEALQGSDMNWQNTLQQQAMARIQYASGGIQKFPQQAFEGGANQETGAIPFASSQQQGMRLVAKEEQFEMEKLDGAEINRNKSEMEMEMNNLDPQQLRIQQRLSQHAFMRSNFPQAAWNSLGQPMEKETKKEDQLQKRKSVQSPRLSTGALPHSPLSSKSGEF…
Glyma07g05720	7.08	15	213	-1.03208	0.690625	1.01052	0.976383	weakly similar to ( 105)AT4G00850| Symbols: GIF3 | GIF3 (GRF1-INTERACTING FACTOR 3) | chr4:357675-358928 FORWARD no original description	MQQTPPMIPMMPSFPPTNITTEQIQKYLDENKKLILAILDNQNLGKLAECAQYQAQLQKNLMYLAAIADAQPQTPAMPPQMAPHPAMQPGFYMQHPQAAAAAMAQQQQGMFPQKMPLQFGNPHQMQEQQQQLHQQAIQGQMGLRPGDINNGMHPMHSEAALGGGNSGGPPSATGPNDARGGSKQDASEAGTAGGDGQGSSAAAHNSGDGEEAK
Glyma07g05910	6.14	7	115	-1.1795	0.625821	2.42551	0.0714061	weakly similar to ( 152)AT2G46600| Symbols: | calcium-binding protein, putative | chr2:19143141-19143548 FORWARD no original description	METEFEDLLPVMAEKLDVESFVSELCGGFKLLSDPETGLITSESLRTNSALLGMEGMSKEDAEAMVRQGDLDGDGKLNETEFCILMVRLSPGMMEDAESWLEKAIDEELSNFKLL
Glyma07g10040	6.06	6	100	-1.06992	0.809879	-1.30482	0.296345	very weakly similar to (80.5)AT3G25855| Symbols: | metal ion binding | chr3:9460845-9461504 REVERSE no original description	MVMRINIDCNGCYRKVKRALLDMPELDTHLLEKNQTRVIVCGRFIPRDVAIMIRKKTNRRVEILDIQDLSESNAEMEDQKPMTNNWTLLTTQNQMETCLA
Glyma07g15260	7.27	12	166	1.00594	0.975809	1.12919	0.707027	weakly similar to ( 119)AT4G29160| Symbols: SNF7.1 | SNF7.1 | chr4:14381025-14382348 FORWARD no original description	MLEMLEKKDDAKEFAKGNNKRAAIQCLMREKLYENHIEQLRNFQMRIHDQMIMLEGAKATTKMIDALRTGATAMKAMQKAMKFDVVDKIMDEINEQTQNKRMIQETLSAPTDISRNYDELEVELEELEVVELEEGLLQLTTTTPTITLQNEKLSHSLHFMVVEQLQ
Glyma07g24950	7.83	9	116	-1.42255	0.00901996	1.07633	0.655971	weakly similar to ( 140)AT1G70660| Symbols: MMZ2, UEV1B | MMZ2/UEV1B (MMS ZWEI HOMOLOGE 2); protein binding / ubiquitin-protein ligase | chr1:26644418-26645612 FORWARD no original description	MELLAMEWMMLMTYTCNLGLGLSSVPLVRDYPDNPPSVRFQTRINMTCVNQETGVVEPHLFPMLANWKRERTMEDILIQLKREMMSPQNRKLTQPPEGNEESRVDQKGLVVRCCIV
Glyma07g25460	6.57	13	199	-1.59566	0.260542	1.09055	0.633995	very weakly similar to (87.0)AT3G49680| Symbols: ATBCAT-3, BCAT3 | ATBCAT-3/BCAT3 (BRANCHED-CHAIN AMINOTRANSFERASE 3) | chr3:18433753-18436458 FORWARD no original description	MEEPLSLSTNLRNQNHSMNCNMPICSMKKVDEETGKYYDNLGFGLQPTDYMYIMKCTRGGSFSKGELQRFGNIELNPSVGVLNYGQLCLVLQGIEHMNMMMKMRNISLIFCSNFENEGLGEAYDGNIVFASDLETFGGGHNDPISVALGGMLPFYINIMMVDERFYVPPDLPIATYSCIVVCNFPWPLYALPWCCTSLX
Glyma07g25940	6.43	9	141	1.18197	0.648629	1.47508	0.038617	weakly similar to ( 167)AT1G24620| Symbols: | polcalcin, putative / calcium-binding pollen allergen, putative | chr1:8723879-8724439 REVERSEweakly similar to ( 105)CALM3_PETHY no original description	DLEYVFKKFDANGDGKISASELGSMMKSLGQPATEEELKKLIREVDSDGDGHINLEEFTELNTKDVDPDEVLENLKDAFSIFDLDGNGSITAEELKMVMASLGDACSIEECRKMIAGVDGNGDGMINFDEFQIMMTGNMNK
Glyma07g38250	6.61	8	122	-1.33954	0.408122	-1.06301	0.900563	no original description	MGKNKKVEQQNKVIIVEFKVSMYCNSCERTVAKVISKCKGVEKFITDMNEHRVVVTGRIDPMKVFKKLKKKTGKKVEIVSNMDEEPNDESDKLVMMHQFAPENDSCIKTETIMMFSDENPNA
Glyma08g03010	6.61	8	122	-1.01269	0.941248	1.42582	0.0172883	highly similar to ( 646)AT4G31170| Symbols: | protein kinase family protein | chr4:15153505-15154852 REVERSEweakly similar to ( 111)CIPK1_ORYSA no original description	MFWSFMCLLSEIWHDLATYGAWIFIGYVFTRHIMGIYWIGYLVNIGMIWQATMHGWLTVATTLHYSLQYHSSVISYCIHAFSNAYHVAVYLVLNGRCMMWELCFYLMFNLLCFLTTMCSVLK
Glyma08g05690	7.52	27	360	-1.11976	0.87606	1.23131	0.341928	moderately similar to ( 278)AT4G02750| Symbols: | pentatricopeptide (PPR) repeat-containing protein | chr4:1221116-1223461 REVERSE no original description	NFQVQRPTNYPKPHFKGPHIVKRTKAISTHMRNGHCDLALRVFEAIPLRNSVSYNAMISGYLRNTKLSLARDLFDKMPHNLLGMSGTADSVMPACCLIQCLKMMLFPGMPCCLGMSGVGMMPHKSQEFRPSPGMGYLQHMFRVGDSRRLVAYLSPNQTGNCLMGGYVKTNMLGDAKQLFDQMPVRDVISWNTMISGYEQDRDFEGCFHVNSDGVCICAGWNKREMSYNVMIPGYAQYKRMDMARELFEAMPFPNIGSWNIMISGYCQNGDVAQARNLFDMMPRRDSVSWAAIIAGYAQNGLYEEAMNRFVEMKRDGESLNRSTFCCALSACADISALELGKQVHGQVVKTGYEKGCLVGN
Glyma08g08110	6.28	12	192	1.37657	0.316954	1.23691	0.714565	weakly similar to ( 189)AT3G43660| Symbols: | nodulin, putative | chr3:15576320-15576916 FORWARDmoderately similar to ( 233)NO21_SOYBN no original description	IDYLQRAQWLRAAVLGANDGLVSVTSLMMGVGAVKRDEKAMLLAGFAGLVAGTCGMAIGEFVAVCTQYEVELGQMKRDMNMTVGEEKDLEMGMEKRALPNPLQATLASAVSFSIGALVPLLSAAFIENYRNRVIVVVAMASLALVVFGRVVAQLGKTHKMKSCVRFLLGGWIAMAITFGLTKLLGAKALDNE
Glyma08g11540	7.25	19	263	1.03814	0.923323	1.07482	0.874765	very weakly similar to (84.0)AT5G05790| Symbols: | myb family transcription factor | chr5:1740725-1741672 REVERSE no original description	RQRGKGLQWTVEEHMKFLVALDEVGKGDWITISKHIGTKSSTQVASHAQKYYLRQKAKKKIRKSIHDITLNTISHQDDTQNSTPHPDPEIQPVHEIHQMQEMPPNSMTHQMIHEIQQMQDILSVYPSNNITHQMGGFEHFVNQQVHEMPVYPPNNMTHQMSGFEHFANQQVHEMQQMQDILSMYPSNNMIHQMNGSEYFVNQQVHEMPVHPPNNMTHQMSGFQYLANQQVLMHYFHPFCFWKFHQIIFVYSPHRFWSLVCFKV
Glyma08g12170	7.19	12	168	1.738	0.0403386	1.0527	0.848961	weakly similar to ( 102)AT1G75390| Symbols: ATBZIP44 | ATBZIP44 (ARABIDOPSIS THALIANA BASIC LEUCINE-ZIPPER 44) | chr1:28295885-28296326 FORWARD no original description	MASPGGSGTYSSGSSSLQNSGSEGDRDIMEQRKRKRMLSNRESARRSRMRKQQHLEGLSAQLDQLKKENTQMNTNIGISTQLYLNVEAENAILRAQMEELSKRLNSLNEMISLINSTTTTNNCLMFDEAQETTTQLFNDCGFMDAWNYGIPLNQQIMAYADNDMLMMY
Glyma08g19200	6.67	10	151	2.82441	0.0206846	-1.89954	0.0092265	moderately similar to ( 278)AT5G10160| Symbols: | beta-hydroxyacyl-ACP dehydratase, putative | chr5:3185820-3187160 FORWARD no original description	YPAFPTVMDINQIRDILPHRFPFLLVDRVIEYNPGVSAVAIKNVTINDNFFPGHFPERPIMPGVLMVEAMAQVGGLVMLQPEVGGSRENFFFAGIDKVRFRKPVIAGDTLVMRMTLTKLQKRFGIAKMEGKAYVGGEVVCEGEFLMAMGSE
Glyma08g21970	6.76	10	149	-1.38162	0.19938	1.06451	0.684625	no original description	MLLRETFRKTKVFFSKSFQKFWSFFFGEYQKLPRSLSFNPFLSRSDLGRTKMYGNNMSMTAMEDAQKSIHEERAQEKKNKGKKEYLSSQNMNKKAHVLAQKMKAMDMMDAGDLEHVLDIEEVLHYYSRLKSPVYLDIVDKFFKDMQSEL
Glyma08g22820	6.88	34	495	1.44634	0.389516	1.38837	0.200752	highly similar to ( 845)AT1G48900| Symbols: | signal recognition particle 54 kDa protein 3 / SRP54 (SRP-54C) | chr1:18088699-18091411 REVERSEhighly similar to ( 778)SR541_HORVU no original description	MVLAELGGSISRALQQMSNATIIDEKVLNDCLNDITRALLQSDVQFKLVRDMQTNIKSIVNLDDLAAGHNKRRIIQQAVFNELCKILDPGKPSFTLKKGKPSVVMFVGLQGSGKTTTCTKYAFYHQKKGWKPALVCADTFRAGAFDQLKQNATKAKIPFYGSYMESDPVKIAVEGVERFKQENCDLIIVDTSGRHKQEAALFEEMRQVSEATKPDLVIFVMDSSIGQAAFDQAQAFKQSVAVGAVIVTKMDGHAKGGGALSAVAATKSPVIFIGTGEHMDEFEVFDVKPFVSRLLGMGDWSGFMDKIHEVVPMDQQPELLQKLSEGNFTLRIMYEQFQNILKMGPISQVFSMLPGFSAELMPKGREKESQAKIKRYMTMMDSMTNEELDSSNPKLINES…
Glyma08g22860	6.22	12	194	1.14441	0.774228	-1.28398	0.0437907	no original description	MAASASNSTLHSPTTPNTTFVQADPSNFRAVVQKLTGASDDPSAPKLPLTLPSRLAAAQSHHRPAVGGEVIGPKKPNFKLHERRNAAAKKLDLPIDRAMSMMMMTSPTSSVVRNRTPTTLESMNMMMMMMGSPVSPLEFVARGSPRTPHEEEEERAIAEKGFYLHPSPRASQPPELLPLFPLHSPTHNNNTTNS
Glyma09g12040	6.16	18	293	1.11802	0.529193	1.08193	0.796445	weakly similar to ( 107)AT1G80520| Symbols: | similar to unknown protein [Arabidopsis thaliana] (TAIR:AT1G15760.1); similar to unnamed protein product [Vitis vinifera] (GB:CAO45007.1); contains InterPro domain Sterile alpha motif homology (InterPro:IPR010993) | chr1:30281373-30281951 FORWARD no original description	MDWFSWLSRTSLEPSLIYEYGLAFARNELQLEDAIYFNHEFLQSMGVSIAKHRLEIIKLAKKEVGGGGAVMMMRSSSSIKFSIKKCLRKCFSKLVSREDHHEAMMATTAMMATEPNWYQGKWRRARHNGNNEDLKGDNNNNNNNNNKGVQRSRTIALSGPLDGNGRIIHEKMMNNNKVMKLSGPLDGKMNGGNNERVNMYASANRSPLMSANTPTRPLDGRFMGSVKSPRLSGPLDARPTMVNSRSPRLTRPLDDRTESPMGYSPYNKVRADAADYDDDYAMWPTLFEDLKPT
Glyma09g16570	6.25	13	209	1.17156	0.469867	-1.10258	0.76383	weakly similar to ( 159)AT5G43080| Symbols: CYCA3;1 | CYCA3;1 (CYCLIN A3;1); cyclin-dependent protein kinase regulator | chr5:17310455-17312017 FORWARDweakly similar to ( 150)CCNAL_DAUCA no original description	MMHEGSPPNVRILVLLILVHMPRALTSRSTVSLTFRNDYLCAMERKRRPMFNYMDRVQHMVTVNMRGIFMDWLVEVVVEYKLLSKTLNLSMSYIHRFLSVNPMSKSRLQLLDVSSMLIASKYEEVNPPGVDKFYSITNNTYEKAEMEAKILASLNFEIGNPTAITFLRVSHGLLHAYMPFLISCYFFRKSEFSPYKLQHITILASNVFF
Glyma09g37240	7.29	18	248	1.21583	0.630483	1.06474	0.880041	moderately similar to ( 265)AT2G36730| Symbols: | pentatricopeptide (PPR) repeat-containing protein | chr2:15412147-15413652 REVERSE no original description	MGLSIFSGCGVVGLSLMTSMVLLLSACAELGYLSLGRWVHSQLVLRGMVLSVQLGTALVDMYGKSGALGYARAVFERMEKRNEVLALFAMMSNNNNNSRDIRPNYVTYLGVLCACSHAGMVNEDYKYFHDMECVHGIKTLMMHYGAMVDVLGRAARLEEAYEFIQSMPIEPDPVVWRTLLRVGERVRKKLLLMEPRRGGNLVIVANMFAEVEMWEKAANVGHESGGMKKVAGESCADLGGSMHRFFAX
Glyma09g38660	7.41	8	109	-1.28671	0.502098	-1.30431	0.452677	weakly similar to ( 119)AT1G65295| Symbols: | similar to unknown protein [Arabidopsis thaliana] (TAIR:AT5G01015.1); similar to unnamed protein product [Vitis vinifera] (GB:CAO22991.1) | chr1:24255230-24255717 FORWARD no original description	MMPAHGLIISLIFVSILANEASLVHEANGSFPMVPLVEAGKMEMMMVMNESRRKLGSFQICALCTCCGGAKGMCLPSPCCYAINCNIPHRPFGFCSFTPKTCNCFGCHL
Glyma09g39370	6.04	11	183	-1.75439	0.1459	-1.28769	0.208003	moderately similar to ( 264)AT1G63800| Symbols: UBC5 | UBC5 (UBIQUITIN-CONJUGATING ENZYME 5); ubiquitin-protein ligase | chr1:23671551-23672666 REVERSEmoderately similar to ( 256)UBC4_WHEAT no original description	MSSPSKRREMDLMKLMMSDYKVEMINDGMQEFYVQFHGPNDSPYHGGVWKVRVELPDAYPYKSPSIGFINKIYHPNVDEMSGSVCLDVINQTWSPMFDLVNVFEVFLPQLLLYPNPSDPLNGEAAALMMRDRPSYEQRVKEYCEKYAKPEDIGEATEEKSSDEEMSEDEYDSSDEQVVGKADP
Glyma10g01860	7.11	14	198	-1.13477	0.589968	1.06858	0.737782	no original description	MAENSMIISIDQKAMVTPHEEPNYNITRSSLKNSMRPKNFFKVALFMMRGRSRKSKMLAVDDESKSIWRKLVGSMRPLHLQSNHDDDNNNNVNPHQSKMMKTTSAPSENGDDSFDSATEFGNSSSPASSRYASAVGLNEMVQEEEENEKINNNDGEGDEMIDAKAEEFIAQFYHQMRLQRLDVMDHHYQEISMRSLGL
Glyma10g02650	6.47	9	140	-1.1092	0.812589	1.03453	0.959859	no original description	MASFWPFLAMFMALMACNCSSLASASRQSMHVSTISAAPTTLPGAPLYYSPTMSPDIEPLFPTPGGSAFSPSESSIPTIPSSPSPPNPDVTNSPGSVLAFPPSESMPAMAPSSKGASLPVYSVLHLAILVIICIMQLHGM
Glyma10g04890	6.71	29	433	-1.07648	0.732577	-1.0915	0.785667	weakly similar to ( 129)AT2G20180| Symbols: PIF1, PIL5 | PIL5 (PHYTOCHROME INTERACTING FACTOR 3-LIKE 5); transcription factor | chr2:8711606-8713318 REVERSE no original description	MDDDDEEYPIPVSKKPSTQNDEIMELLWQNGQVVMQNQNQRPFRKQPPTTDGDGPIPAREIRSSEAENYNSQHLFMQEDEMASWLHYPIHEDPPPFDHHDFCADILYPPPNATASQNQSSASVQSSPTVATAEHVETGRASVSAAAGKTPASDGGRETATCDVTVTSSPGGSSGSAEPVQREPVVNRKRKGREQEESEYQSEVTKKQVRGSTSTKRSHAAEVHNLSERRRRDRINEKMKALQELIPRCNKSDKASMLDEAIEYLKSLQLQVQMMSMGCGMVPMIFPGIQQYMPPMGMGIGMGMGMGMEMGMGMNRSVMPFPNMLASSTLPAATATAHLGPRFPMPPFHMPHVATPDSSRMQGANHPDNNMLNSLGTLDPDQSCIPNFTDPYQQYLSLQQ…
Glyma10g05420	6.23	16	258	-1.01345	0.981432	1.24538	0.64386	moderately similar to ( 382)AT2G37330| Symbols: ALS3 | ALS3 (ALUMINUM SENSITIVE 3) | chr2:15676269-15677251 FORWARD no original description	MVEFLKGMVKPVAATAVVLLAVLLSFMQKLGLEGEMVYAMFRAFLQLSIIGFVLQFIFNQGNAGWIILAYLFMVCVAGYTAGQRAKHVPRGKYVAGASILTGTAVTMFLLVLLNVFPFTPRYIIPVAGMMVGNAMTVTGVTMKRLRDDIKAQMNLVETALALGASPRQATYEQVKRALVIALSPVVDNAKTVGLISLPGAMTGLIMGGASPLEAIQLQIVVMNMLIGASTISSIMSTYLCWPAFFTKAYQLETQVFSK
Glyma10g06240	6.78	8	119	-1.05822	0.707078	-1.23474	0.346694	weakly similar to ( 182)AT2G36930| Symbols: | zinc finger (C2H2 type) family protein | chr2:15517081-15518426 REVERSE no original description	MGGKCPHRNVKKRRYSHKTARRTKFELKGDDMVYAQLNKPDQERPPLPVDEDLPGMGQYYCLHCDRYFANITVRDEHFKTKRHKKRIKQMMGPAPHTQLDADLASGMGMPDNGPKLMSM
Glyma10g10940	6.45	8	125	-1.01668	0.955746	1.18436	0.73537	no original description	MESSMRLGYLMTIFAVSGSMVFLFHQVNKHLCNNFMKKFEIEIRGSMKHQAKKKVRFAKDVVEFPMEEKNDHINVARTQEVIKKVLFIDDVKKWKHEQKLKDVMPPNRAILYKGIMNDRKGRLGF
Glyma10g27920	6.11	29	476	1.03056	0.930692	-1.03975	0.943118	moderately similar to ( 280)AT4G18750| Symbols: | pentatricopeptide (PPR) repeat-containing protein | chr4:10304861-10307476 FORWARD no original description	ARRMFDEMSDRDLALWSALICGNMWNYEWLEALLLFGKMREQGLMPDSVIVTSVLPVCGRLEAVKLGMALQGCAVRSGFESDLYFSFAMIDMYCKCGDPFDAHRVFSRMVYKDVVSWSTSIVGYSQNRLYQESYELYTGMVNVGLATNAIVVASVLPTFGKLKLLKQRKDMHNFVLIEGLMPNVVVGSALIDMYANCGSIKEVESIFECMSNKDIMVWNSVIIRYNLVGDSESTFFTFRRIWGAKHRPNSITLVSILPICTQMEAFRQGKEIHGYVTKTNMYSKCGFLELRVKIFKQMMVRNVITYSTMISASGAHGLGEKGLAFYEQMEEEGIRPNKVTFISLLSACSHACLFDREGGCYMKHYLCMVDLIGTTGDLDGAYKFITRMHMTPDANVLGS…
Glyma10g29710	7.04	39	555	-1.89289	0.169136	-1.50032	0.085995	very weakly similar to (98.6)AT5G19090| Symbols: | heavy-metal-associated domain-containing protein | chr5:6387912-6389857 FORWARD no original description	MSKQDTMKIQVNIHCDGCEEKVKKILQKIDGVYSVNIDAERGKVMVSGHVDPAKLLKKLKRSGKHAELWGGQRGMMYNQNYPTYPQFKNMHIDNTKGGSKDNKSQNHKGGAQKGGGGGGGGGGGGQLAHFQNANGGSKVPPKNQKSVNFNLSEDELDESDFDEFDDDYDEFEDDLEEEEEEEEYGNGYGHGGHGHGHGHGHGQQGQGHPMQHNKMMAMMGQVGNGRGPHGMNGPAMNGHKGNGGVNYGGVKKGEVIDLPIQIKGKGGNFNEGKNGKKGNGDGGQKNKGGKQKGGGDNNHHNNGNKKKNSKDKNGGGGFLVRFLGLGKKKKAGGGGGSADTATNKNKNNKGKKDGGGGGGGGGKFDKIDFDFQDFDIPPTKGKNGKGGNNGKNNNDKGHG…
Glyma10g30380	7.43	11	149	7.53407	0.0128009	5.27301	0.0255376	weakly similar to ( 145)AT2G27030| Symbols: CAM5 | CAM5 (CALMODULIN 5); calcium ion binding | chr2:11539797-11540138 FORWARDweakly similar to ( 144)CALM3_PETHY no original description	MKEVLSEDLIVEFLEAFCLFDRDGDGCITMEELASALRTLNQNNPRKEELQIMMNEVDMDGSGTIEFGQFLNLMARKMKQSEAEEELKEAFKLFDKDQDGYISPTELLSVMRNIGVKVTEEELEHMIRVADLDGDGRVNYEEFMRMMTI
Glyma10g36240	6.61	8	122	1.04243	0.919169	-1.338	0.275846	weakly similar to ( 158)AT1G78190| Symbols: | Identical to TRM112-like protein At1g78190 [Arabidopsis Thaliana] (GB:Q9C9R3;GB:Q7Y226); similar to unknown protein [Arabidopsis thaliana] (TAIR:AT1G22270.1); similar to unknown [Picea sitchensis] (GB:ABK23797.1); contains InterPro domain Protein of unknown function DUF343 (InterPro:IPR005651) | chr1:29423513-29423887 REVERSE no original description	MRLITHNMLSSNIKGVVNGFPLRIEAEKVMEKTMEMNSEFLEKMFEKVDWKAFVDASRAMGYTELPEEANSSMLDSDEFLNRFHHALLELDLEEGALVCPETGRRFPVSKGIPNMLLHEDEV
Glyma10g40080	6.22	15	242	1.03734	0.965914	1.18634	0.607531	weakly similar to ( 184)AT5G60440| Symbols: | MADS-box protein (AGL62) | chr5:24323555-24324746 FORWARD no original description	KSRGRQKIEMKKMSNESNLQVTFSKRRNGLFKKASELCTLCGTDVALVVFSPGQKVFSFGHPNVDAVIDRYLARPPPTDSGTMQIIEAHRMAHVHDLNVQLTQINNQLDHERKRTNELNLMNKEAQAQMWWARPVDGMSMAQVKQFKAALEEMKKQVARLVDRAMLQSVTNPTLQFFPGVSSSSNSNLVHQPHPLPAPQVFTPHLIQPPMLQNFMFHDGSMMRHHGFDNIGMGGYGPTAGFF
Glyma10g41120	6.71	10	150	-1.05183	0.899349	2.47079	0.0536594	no original description	MQATFLCSHMFLSYPLPVKLLQRSSPHKLFSDGTTTRRSLIYASKRDPFGHHYDGNLVDENMILLRMRIREIEMVEMKGKATSDWSVWEKKYFAENYGSDVCEAVGLLQRVLMNTRPSFALGMLALVMLSMSMSTLQVGFHLIEFAKGII
Glyma10g41930	6.05	17	282	1.32498	0.404771	1.03724	0.931914	moderately similar to ( 244)AT1G68320| Symbols: AtMYB62, BW62B, BW62C, MYB62 | MYB62 (myb domain protein 62); DNA binding / transcription factor | chr1:25607505-25608547 FORWARDweakly similar to ( 154)MYBA2_ORYSA no original description	STIAKRDLSSNEEESELRRGPWTLEEDSLLIHYIARHGEGRWNMLAKSAGLKRTGKSCRLRWLNYLKPDIKRGNLTPQEQLLILELHSKWGNRWSKIAQHLPGRTDNEIKNYWRTRIQKQARQLNIESGSKRFIDAVKCFWMPRLLQKMEQSNSPSPHHSSMTNMMNLGNSGEASMSSMSSSFNINPSMSSSSSPPQREFIMDDANHFNTIPSNVFENNVCSYPIQDNCYVDTNNYGMEGINMDPLSAMDTYDFPQFDFQTAGNGWMLDSMGDSTLWNMEAM
Glyma10g42060	6.58	10	153	-1.05781	0.91063	-1.00791	0.985908	no original description	MKRQRGVHVNAVRPIMNNNPPNVEDVAAAAMGKKKVKKEGEQKVGNIMVEEEEIKESSTSRDSMVGGYLQQHQQGGMLMGWNWEENMNMPLVGGVVDEQMSWGSTWFPGWDMDLLGGDAFTALYNDVLWDDDIWNLNNQIPIPLDTTKRFHLE
Glyma10g43720	6.67	7	106	-7.15165	0.00643494	-1.37635	0.378803	very weakly similar to (86.3)AT3G55240| Symbols: | Overexpression leads to PEL (Pseudo-Etiolation in Light) phenotype. | chr3:20484853-20485682 REVERSE no original description	MEDSSKSSSSSSSSSSPATYIRMVQHLIEKCLIFHMTKEECMEALSKHANINPIITSTVWKELEKENKEFFEPYMKSKAKDDRMSQEETNQIIQKMMSELDSSKDD
Glyma11g09620	8.02	17	213	1.42966	0.0664293	1.28585	0.0301637	no original description	MVTLQGHTLHLLGHTLLTKGTHLLMATLHKVAILRLVIPLLAILLLLVVTPLLVTLHMVILDHLLHMDLMRLGTAVWGHCLLVVLLRQQLRMGLTMFPMATMDMVHMEDMDTCPMGNSNIMASSSMESSASMGNLSMGSLARVCSRSGSDDIILIFCTYKPRFWMLLHIAFIINSTLFDVHLYFGGTLVFFFIVKDVSSRSYSIILESAYSRK
Glyma11g12690	6.19	7	114	-1.59727	0.165795	-1.0858	0.785188	no original description	MRTPYLSKKMKSFFAFFVVFSLLVVNLSYARKDMGDYWKNMMNGQPMPEAIKDLLVQDPQVSDAMKDHFIRDFDIKPNVILYHTHVVPHKHKQKIQQAMAKKLEPEFQGTERHG
Glyma11g12810	8.74	9	104	-1.05367	0.848903	1.02175	0.946621	no original description	MIMEGYNKKVMIVGMVLGMAMIGMANGQYSFCRMPSDGLAACKPSVSGDYPADPSTACCSAIAKADLKCFCRFKDSGLLSMYGVDPNKCMELPVKCKVVDSFHC
Glyma11g13380	7.19	11	154	1.07731	0.813391	1.24299	0.0916985	weakly similar to ( 161)AT3G07560| Symbols: APM2, PEX13 | APM2/PEX13 (ABERRANT PEROXISOME MORPHOLOGY 2); protein binding | chr3:2411622-2413316 REVERSE no original description	MNYNSGYGSYGGVGGLYGGGMYGSSMYRGGYGGLYGSSGMYGGGMYNGGFGGPMGGYGMGGGGPYGAEDPNNPYGVPSSPPGFWISFMRVMQGVVNFFGRISMLIDQNTQAFHMFMTALLQVLYSSFFFPFYAHLLILYRLCSYGSLKIKIRLK
Glyma11g13620	6.04	9	150	1.66353	0.0321587	1.56155	0.211291	weakly similar to ( 195)AT3G07490| Symbols: AGD11 | AGD11 (ARF-GAP DOMAIN 11); calcium ion binding | chr3:2391195-2391656 FORWARDvery weakly similar to (91.7)CALM_CHLRE no original description	MDPAELKRVFQLFDRNGDGRISLKELSDSLENLGILIPDKDLAQMIERIDMNGDGCIDVDEFGDLYESIMEEPDEEEDMREAFNVFDQNRDGFITVEELGTVLASLGLKQGRTLDECKKMIMKVDVDGDGMVNYKEFRQMMKGGGFTVLS
Glyma11g14290	9.09	16	177	-1.44152	0.137053	-1.60569	0.0309071	very weakly similar to (94.0)AT5G59030| Symbols: COPT1 | COPT1 (COPPER TRANSPORTER 1); copper ion transmembrane transporter | chr5:23851171-23851683 REVERSE no original description	MVKKPIYLSIPSSNKLISKTIVMDDGHMHGMGGMAPTPPSTNGTTMTMMMHHKMMMHMTFFWGKDADILFNNWPGGKSGMYVLALVFVFVMAVLVELLSHTRFIKPGSNHVVSGLIKTLLHVLRVGLAYLVMLALMSFNGGVFLVAVLGHALGFFVSTVAFNKPPQNEGFDLPPISC
Glyma11g15760	6.52	15	231	-1.2398	0.157637	-1.37209	0.196613	weakly similar to ( 122)AT5G60200| Symbols: | Dof-type zinc finger domain-containing protein | chr5:24258304-24259177 FORWARDweakly similar to ( 119)PBF_MAIZE no original description	MDPSSGQHQQMSSQSLENMLACSKAHQERKPTPQPEQALKCPRCDSTNTKFCYYNNYSLSQPRYFCKSCRRYWTKGGTLRNVPVGGGCRKNKRSSSSSSTSKRVQDQAFTPNVNPLTGLPSLMSYDSNDLTLALARLQKQSCGQLGNMYYGYGNGDMGEVDNGGGVGVSSSGEMMMMMMPYNNDQEMRNKRCCGVFHGNSMETQTWVNLTQEELVIGMASIHHGMDFSTVP
Glyma11g17120	7.22	33	458	-1.22109	0.197923	-1.67288	0.0879228	moderately similar to ( 258)AT4G00050| Symbols: UNE10 | UNE10 (unfertilized embryo sac 10); DNA binding / transcription factor | chr4:17863-19848 FORWARD no original description	MSQCVPSWDVEDNPPPSRVSLRSNSNSTAPDVPMLDYEVAELTWENGQLSMHGLGLPRVPVKPPTAATNKYTWEKPRGSGTLESIVNQATSFSHQEKPRPLNGDSGGGGGVYGNFMVPWFDPHAAATTTTTTTNTMTMDALVPCSNREQGKKKGMESGPGTCMVGCSTRVGSCCGGKGAKGHEASGRDQSVSGSATFGRDSKHVTLDTCDREFGVAFTSTSINSLENTSYAKHCTKTTTIEEHDSVSHSKPMGEDGDEEKKKRANGKSSVSTKRSRAAAIHNQSERKRRDKINQRMKTLQKLVPNSSKTDKASMLDEVIEYLKQLQAQVQMMNRINMSSMMLPLTMQQQLQMSMMSPMGMGLGMGMGMGMGMGMDMNSMNRANIPGIPPVLHPSAFMPM…
Glyma11g25660	7.14	10	141	1.02747	0.922024	1.95894	0.295109	weakly similar to ( 109)AT3G50770| Symbols: | calmodulin-related protein, putative | chr3:18884968-18885585 FORWARD no original description	MRMNTEFERVLKYFDEDGDGKISPCELRNRLGMIGGELLAKDAEKLIEELDSDGDGFLSLEDFVKLMEAAGEDEKLKDLEEAFEMYNDTEMFGFITPKSLQRMLGRLGESKSMEQCTTMIGHFDLNGDGLLCFDEFRVMMQ
Glyma11g25670	6.43	9	141	-1.06355	0.91165	1.1732	0.215083	weakly similar to ( 109)AT3G50770| Symbols: | calmodulin-related protein, putative | chr3:18884968-18885585 FORWARD no original description	MRVNTEFERVLKYFDEDGDGKISPCELRNRLGMIGGELLTKDAEKLIEELDSDGDGFLSLEDFVKLMEAAGEDEKLKDLEEAFEMYNDTEMFGFITPKSLQRMLGRLGESKSMEQCTTMIGHFDLNGDGLLCFDEFRVMMQ
Glyma11g26260	6.25	10	161	-1.0132	0.970947	1.00612	0.987721	weakly similar to ( 129)AT5G48670| Symbols: FEM111, AGL80 | AGL80/FEM111 (AGAMOUS-LIKE80); DNA binding / transcription factor | chr5:19756051-19757016 REVERSE no original description	MKKMNEISTLCGIETCAIIYSPNDPQPEVWPSDSGVQRVLSRFMEMPEVRQSRKMLNQESFLRQMITKGQQQLTRQRNENRKKEMTNLMLQYLTAGKVVGNPSLVDLNDLSWLIDQNLNEIEKKITMLQIQEVVIPVIENEGHMNHVQGLESNMDTKKKQH
Glyma11g30200	7.63	10	132	1.13604	0.802983	1.48477	0.415319	no original description	FMTPRIPARDFWPFESGVLNGLGKFMCMPQWEQTKKMVDEEHFIAQSNVKGKEKLKKLVDENKEKEMSLFMVQWLKTRKVQPEHNMTKADFNAVSSMIDQNRKDIAERMEILSVSEVVPNQPRMQHQHSNPI
Glyma11g30490	7.05	11	157	-1.24584	0.584641	1.14742	0.731031	weakly similar to ( 124)AT5G48670| Symbols: FEM111, AGL80 | AGL80/FEM111 (AGAMOUS-LIKE80); DNA binding / transcription factor | chr5:19756051-19757016 REVERSE no original description	MAPGKLKLTFIGNDSKRKNVCKKRKQSLLKKTEELSMLCGVEACAIVYGPNDPRPVIWPSEFGVENVLRKFMSMPHWEQSKKMVNQESFIAQSIMKSKEKLQKIVKENKDIEMSLFMAHCFKTGMFQPDINMTTADMNVLASIIEQNLKDIDKRMEX
Glyma11g30620	7.05	11	157	1.04156	0.952661	1.27516	0.414813	weakly similar to ( 127)AT5G48670| Symbols: FEM111, AGL80 | AGL80/FEM111 (AGAMOUS-LIKE80); DNA binding / transcription factor | chr5:19756051-19757016 REVERSE no original description	MAPGKLKLTFIGNDFKRKNVCKKRKQSLLKKTEELSMLCGVEACAIVYGPNDPRPVIWPSELGVENVLRKFMSMPQLEQSKKMVNQESFIAQRIMKSKEKLQKIVKENKEIEMSLFMAHCFKTGMFQPDINMTTADMNVLSSIIEQNLKDIDKRMEX
Glyma11g37800	6.83	17	250	-1.54644	0.342107	3.32928	0.17073	no original description	MRRSLVFQQQYYADDGTWMETHQAQQHGYAFHEESSWSSDNNYGHKRFPAAMHMNKLGAFAVDSDLSMSKQKHTKLGGAMRMNRLAAFAMDSDISMSKQRHGKLGRGMHMNMNMLGDFAMDSEMLMSKQKHGKLGGSSGNNIFQEGMHSDHGFGRGYAHHGGGKKLPFAANSSNSHHFSKGGGKFNSGGHHEYFSEESEEYEEAYTEEHVGAITAKVEEMRYQHHNLGGDPCYVNPYDRNNKNWWTAKGI
Glyma12g03420	6.35	12	190	2.29422	0.0450983	-1.00538	0.996115	moderately similar to ( 241)AT2G21100| Symbols: | disease resistance-responsive protein-related / dirigent protein-related | chr2:9055768-9056417 REVERSE no original description	MVRQSVVMMLITISIMCAMAVTESLKVKAGNWGASFEGENKETVTNLEFYFHDTLSGQNPSAVRVAEPLDKKKTSMTLFGAIMMADDPLTETSDPKSKIVGRAQGLYGSSCQQEIGLLMAMSYSFTDGPYNGSSFALLGKNSAMNPVREMPVVGGTGLFRMARGYALAKTHWFDPTTGDAIVAYNVTLLH
Glyma12g04960	9.8	10	103	-1.12297	0.757493	1.04304	0.881212	no original description	MEGYKMKVMIVGMVLGMVMIGMANGQYYSFCRMPSDGMAACKPSVSGDNPVDPSTDCCSAIAKADLKCFCRYKDSGLLSMYGVDPNKCMELPVKCKVVDSFHC
Glyma12g05610	6.71	10	150	1.11912	0.622854	2.95846	0.044185	weakly similar to ( 198)AT3G07490| Symbols: AGD11 | AGD11 (ARF-GAP DOMAIN 11); calcium ion binding | chr3:2391195-2391656 FORWARDvery weakly similar to (92.4)CALM_CHLRE no original description	MDPMELKRVFQMFDRNGDGRISLKELSDSLENLGILIPDKDLAQMIERIDVNGDGCVDMDEFGDLYESIMEERDEEEDMREAFNVFDQNRDGFISVEELRRVLASLGLKQGGTLDECKKMITKVDVDGDGMVNYKEFRQMMKGGGFTALS
Glyma12g10270	7.57	44	582	1.44624	0.0431056	1.2878	0.295157	moderately similar to ( 365)AT5G21990| Symbols: | tetratricopeptide repeat (TPR)-containing protein | chr5:7273398-7276321 FORWARD no original description	MFNGMMDPDLMKIAQEQMSRMSPAELARIQQQMMSNPELMRMASESMKNMSAEDFKLAAEQLKHTRPEEMAEIGEKVANASPEEVAAMRSRVDAQIKYQLSAAEMLKKQGNDLHNQGRYNDALKKYMLAKENIKEVPSFQSRKLLLACSLNLMSCYLKTSQYNECIKEGSEVLAYDAKNLKALYRRGQAYKELGLLKDAVSDLSMALEVSPDDDTITELLRDTKEKLAMEGGEHAPRRIVTEEITEVEDVPSGSSLKQSVVQLKKSGDSSKSYSTANNGIPKTKTDSLDALKKDPEAVRSFQNFISNTDPATLASLNAGQFKDVSPDMIKTTSDMVSKMSPEELQRMLDMASSFQGDNPIFRGGSPDSSFNPGSMPPNVTPDMFKAASDMISKMPADDL…
Glyma12g10630	6.32	18	286	1.11786	0.722597	1.30269	0.26638	weakly similar to ( 154)AT2G01050| Symbols: | nucleic acid binding / zinc ion binding | chr2:68337-69884 REVERSE no original description	MENKERAPSRTRRDLLRENMTKIEFENGNSLKKMVHIDDSVFDGLRFPWQDVLVNVLKEILIRLWKLKVGFDMMDIGNNFFMLKFNLGEDKNLVMDGGPWMVFDHYLAVQLWTPEFVAMTATINKTMTWIRFPGLNLYFYDESVMLSLATTVGRPIKVDANTLDVKRGKFARVCVEVDMNKPMIGKVWMRGHWYMMEYEGLHCICSDCGCSGHFSHECMSPKPMKMHIPFSVTQQRWTKVGFKPLFTQEAIGELSLNELHYDYNILKIKTLHSVSSNAVIKPCSIX
Glyma12g22870	8.65	9	105	-1.14799	0.467235	1.0044	0.992276	no original description	MKKLVPQIRATKGELKHTRKNYQMKKLVPQMRVAQRIASKAMTNRFYFDMYDTESFGFITPKSFKKMLKKMGESKSIDECKSMIKQFDLKGDGVVSFEQFRIMMQ
Glyma12g28870	6.01	11	184	1.3244	0.376375	1.37632	0.320313	weakly similar to ( 192)AT1G80160| Symbols: | lactoylglutathione lyase family protein / glyoxalase I family protein | chr1:30156172-30156822 FORWARD no original description	MEKMELAETPLPLLSLNHVSFVCKSVSESVKFYEDVLGFLLIKRPSSFKFEGAWLFNYGIGIHLLESEKVPVKKREINPKENHISFQCSDMKVIMQKLDAMKIEYVTAVVEEGGIKVDQLFFHDPDGYMIEICNCQNLPVLPISSCPLKQLGGEATFKINCFAEESMSMLMMDNFVMDMLKISI
Glyma12g32420	6.61	8	122	1.09609	0.75251	1.61097	0.214307	weakly similar to ( 104)AT2G46600| Symbols: | calcium-binding protein, putative | chr2:19143141-19143548 FORWARD no original description	MAGIGKGVEFEDLLPVIAGKLGGEGLIKELCKGFRLLMDKEKGVITLESLRSNSAMMGLQDLKEEELVSMMREGDLDGDGALSEMEFCVLMFRLSPQLMKDSWFWLQQALQHELINNNVSSV
Glyma12g34610	9.09	11	122	-1.94247	0.191975	-1.38457	0.440855	weakly similar to ( 106)AT4G27280| Symbols: | calcium-binding EF hand family protein | chr4:13663776-13664168 REVERSE no original description	MEQDYLLDFEDYFPSMIARMGAEGFIGELCNGFRLLMDVNKGLITFESLKLNCYLLGLDVMDDELACMLMEGDLDGDGALSQMEFCILMFRLSSCLCTPHGGGGGDGGSGGSGGDPMLMNVM
Glyma13g03910	6.25	7	113	1.1121	0.624729	1.16941	0.181193	weakly similar to ( 187)AT2G27030| Symbols: CAM5 | CAM5 (CALMODULIN 5); calcium ion binding | chr2:11539797-11540138 FORWARDweakly similar to ( 186)CALM3_PETHY no original description	MRSLGQNPTEAELQDMINEVDADGNGTIDFPEFLNLMARKMKDTDSEEELKEAFRVFDKDQNGFISAAELRHVMTNLGEKLTDEEVDEMIREADVDGDGQINYEEFVKVMMAK
Glyma13g19250	6.08	29	478	-1.22291	0.689347	1.29286	0.118089	weakly similar to ( 140)AT2G20180| Symbols: PIF1, PIL5 | PIL5 (PHYTOCHROME INTERACTING FACTOR 3-LIKE 5); transcription factor | chr2:8711606-8713318 REVERSE no original description	MELLWQNGQVVMQSQNQRPFRKPPQPPEANGGDGAISAREIRSSEAENYNNSQHLFMQEDEMAAWLHYPIHEDPPPFDHHDFGADIFYPPPNATASQNRGSAAVQSSFRTTELWHPAPRPPIPPPRRPEHAPSRIHNFAHFTKHGNASSSSKAAAAAQPTVVDSCETPVATAEHAETGRARAAAGKTAVSDGGRETATCDVTVTSSPGDSSGSAEPVEREPMADRKRKGREHEESEFQSEDVDFESPEAKKQVHGSTSTKRSRAAEVHNLSERRRRDRINEKMKALQELIPRCNKSDKASMLDEAIEYLKSLQLQVQMMSMGYGMVPMMFPGIQQYMPPMGMGIGMGMGMEMGMGMNRPVMPFTNMLASSTLPAATAAVHLGPRFPMPPFHMPHVAAPD…
Glyma13g20550	6.78	8	119	1.18904	0.321963	-1.27648	0.239496	weakly similar to ( 184)AT2G36930| Symbols: | zinc finger (C2H2 type) family protein | chr2:15517081-15518426 REVERSE no original description	MGGKCPHRNVKKRRYSHKTARRTKFELKGDDMVYAQLNKPDEERAPLPLDEDLPGMGQYYCLHCDRYFSNVAVRDEHFKTKRHKKRIKQMMGPAPHTQLDADVAAGMGMPDNGPKLMSM
Glyma13g26710	6.25	8	129	-1.11271	0.807756	1.31074	0.361366	weakly similar to ( 132)AT2G07340| Symbols: | prefoldin-related KE2 family protein | chr2:3045641-3046603 FORWARD no original description	MADEANRTAFLEIQSRMIDTTGKIKQVQTQMRSKEAEKKRAFLTMEELKQVPDDTNVYKSIGRMFVLETKATLMNEQETKFKDGEASITALQSSKEYLEKQMAEVETNLRELLQQDPGLARQIMSMNVV
Glyma13g27190	6.92	11	160	-1.04483	0.938135	1.37867	0.168844	no original description	FLQHQGERLEEMRGMLSVVATMISAMTFNAVMNPPGGVIQANGSDLRSWKNMLSNNVKDAMELHPGRAVFLTTQESDFESFVIITLLLVSGVPLKNEVTMGILSIGTCVTLTFLMLSYFFGGFMLGFKSANHVFHFWIYLWLGLLGLIVVFSMIRVISWL
Glyma13g27900	7.52	37	493	-1.1829	0.497234	-1.11617	0.640632	weakly similar to ( 124)AT3G06130| Symbols: | heavy-metal-associated domain-containing protein | chr3:1853054-1854679 REVERSE no original description	MSKEEFLKIQKCVLKVNIHCDGCRNKVKKILQKIDGVFTTEIDAEQGKVTVSGNVDPNVLIKKLAKSGKHAELWGAPKGNSNNNQNNMANQFKNMQIDNGKSGANNKGQKGGGVNNQPKGNNQQQQNPQQQQNPQQQLQQHLQQLQQMKGFQDLKLPQFKDMKLPNPNPNPNPKAVKFSLPEDDLSDDELDEFDDEFDDEFDDDDMDDPQHPLNKMMMMKPPMGAKPPIGSVPMGNGAQMMSNSMMNAQKGGNGGGNNGKKGGGGSGGPVPVQVHNMGGGNEGKNGNGGKKEGGGGGNNQTQGGGNKNNGGKNGGGVPEGKNGNNKNNGGGGGIPNNNGNGGVQAMNMFPNMGGHNPSLVGANVGPMNNMSIPMGNMPMTQMGNIPAVQGLPAAAAMNG…
Glyma13g31340	6.1	15	247	1.0025	0.989869	-1.4289	0.64742	moderately similar to ( 218)AT5G59200| Symbols: | pentatricopeptide (PPR) repeat-containing protein | chr5:23906019-23907791 REVERSE no original description	MVLSEEAEPNEATIVTVLSACASIGTLSLGQWVHSYIDSRHDLVVDENIGNALLNMYVKCGDMQMGFRVFDMIVHKDVISWGTFICGLAMNGYERNTLELFSRMLVEGVEPDNVTFIGVLSACSHAGLLNEGVMFFKAMRDFYGIVPQMRHYGCMVDMYGRAGLFEEAEALLRRMPVEAEGPIWGALLQACKIHRNEKMSEWIRGHLKGKSVGVGTLALLSNMYASSERWDDAKKVRKSMRGTGLKK
Glyma13g32180	7.96	9	114	-1.00982	0.981858	5.89588	0.0161781	very weakly similar to (94.4)AT4G27280| Symbols: | calcium-binding EF hand family protein | chr4:13663776-13664168 REVERSE no original description	MASKKNTVVFEDYFPAMMEKLGTEGFMKELTNGFQLLMDREKKVITFESLKKNSALLGLEGMNDDELRCMLREGDLDGDGALDEMEFCTLMFRLSPALMNNSKELLEEAIYPFH
Glyma13g33500	6.8	10	148	-1.66535	0.474386	1.04438	0.897979	no original description	MSSSEGAFELGSEFSEANNVLLMSLMEETQEEEYYGDERLVSMIQSLEAEITDTEIGQMYEMGHVDGQDCSTSVSDPNHWVDMELISSLPFDEMNAWIPSGYEMMEHAAMEYEAGTGIDDLQLCYGAFLDQQYRENHYLALGPSDAVF
Glyma13g35890	9.76	12	124	-1.36534	0.317382	-1.13342	0.714407	weakly similar to ( 101)AT4G27280| Symbols: | calcium-binding EF hand family protein | chr4:13663776-13664168 REVERSE no original description	MDLDYLLDFEDYFPSMISRMGAEGFIAELCNGFRLLMDVNKGLITFESLKLNCYLLGLDVRDDELACMLIEGDLDGDGALSQMEFCILMFRLSPCLMDDGPNKMCTPQGACGGGGDPMLMMNVM
Glyma13g37990	7.44	9	122	-1.01007	0.986099	1.20495	0.675602	very weakly similar to (99.0)AT4G27280| Symbols: | calcium-binding EF hand family protein | chr4:13663776-13664168 REVERSE no original description	MAGIGKGSVEFEDLLPVIAGKLGGEGLIKELCKGFRLLMDKEKGVITLESLRRNSAMMGLQDLKEEELASMMREGDLDSDGVLSEMEFCVLMFRLSPQLMKDSWFWLQQAMHQELNNNVTKS
Glyma13g41950	6.06	6	100	-1.05933	0.888477	1.4243	0.197816	weakly similar to ( 119)AT3G59470| Symbols: | far-red impaired responsive family protein / FAR1 family protein | chr3:21990076-21991074 REVERSE no original description	FNPKLQHMHSIMHMLHVLDSSYVLSKLSRPRRDGTNIGRALVCNREGYRMPDKREKIVRQRAETRVGCRAMILVRRVSSGKWVVTKFIMEHTHPLTPGKX
Glyma13g42690	6.34	18	285	-1.01672	0.95748	1.34911	0.345714	moderately similar to ( 210)AT1G55170| Symbols: | similar to unknown protein [Arabidopsis thaliana] (TAIR:AT3G14750.1); similar to hypothetical protein [Vitis vinifera] (GB:CAN71449.1); contains InterPro domain Prefoldin (InterPro:IPR009053) | chr1:20584245-20585373 FORWARD no original description	MASRHRVHREPLNARRGYPPEGPYARVPPMPRPPPPIPPHPAVLEEELEFQHAEMRRLVADNRRLIDDRMALQRDLGAAKEELHRMNLAIGDIRAEHEAHSRELVEKGMKMEADLRANEPLKNEVMQLRSEVKKLNNLKQELTGKVQTLTQDVARLQADNQQIPMMRAEIDGLHQELMRARTMVDYEKKANMEFMEQRQSMEKNLVSMAREVEKLRAELASADSRHWGGGMSGGPYGTKFGSPEGFPAPYADGYGVHLGAADKGPMYGVGAASRKGHEKPRMNRR
Glyma13g43800	6.71	10	150	1.29439	0.384049	4.30628	0.032197	weakly similar to ( 143)AT1G04250| Symbols: IAA17, AXR3 | AXR3 (AUXIN RESISTANT 3); transcription factor | chr1:1136381-1138339 FORWARDweakly similar to ( 135)IAA1_ORYSA no original description	MSSQSDAVGCNLKETELTLGLPGTKTNGTKRGFSDTLNTSHNKMLRPTSKEQVVGWPPVRASRKNAMKMSCKLVKVAVDGAPYLRKVDLEMYETYEHLMRELETMFCGLAIRNHLMNERKLMESGNGIEYMPTYEDKDGDWMLVGDVPWK
Glyma13g44330	7.21	36	500	1.09461	0.726691	1.31288	0.181487	highly similar to ( 833)AT1G48900| Symbols: | signal recognition particle 54 kDa protein 3 / SRP54 (SRP-54C) | chr1:18088699-18091411 REVERSEhighly similar to ( 780)SR542_HORVU no original description	MVLAELGGSISRALQLMSNATVIDEKVLNDCLNDITRALLQSDVQFKLVRDMQTNIKNIVNLDDLAAGHNKRRIIQQAVFNELCKILDPGKPSFTPKKGKTSVVMFVGLQGSGKTTTCTKYAYYHQKKGWKPALVCADTFRAGAFDQLKQNATKAKIPFYGSYMESDPVKIAVEGVERFKKENCDLIIVDTSGRHKQEASLFEEMRQVSEATKPDLVIFVMDSSIGQAAFDQAQAFKQSVAVGAVIVTKMDGHAKGGGALSAVAATKSPVIFIGTGEHMDEFEVFDVKPFVSRLLGMGDWSGFMDKIHEVVPMDQQPELLQKLSEGNFTLRIMYEQFQNILKMGPISQVFSMLPGFSAELMPKGREKESQAKIKRYMTMMDSMTNEELDSSNPKLMNES…
Glyma14g01080	6.59	23	350	-1.10219	0.552761	-1.09016	0.340171	moderately similar to ( 486)AT3G53170| Symbols: | pentatricopeptide (PPR) repeat-containing protein | chr3:19715707-19717136 REVERSEweakly similar to ( 124)RF1_ORYSA no original description	MMLGKCRQPEEASLLFEIMLSEGLKPTVDVYTALVSAYGQSGLLDQAFSTVEDMKSVVDCEPDVYTYSILIRCCAKFRRFDLIEHVLAEMSYLGIKCNCVTYNSIIDGYGKASMFEQMDDALNDMIENGNSHPDVFTLNSFVGAYGNAGQIDKMEKWYDEFQLMGIKPDITTFNTMIKSYGKAGMYEKMKTVMDFMEKRFFTPTIVTYNTVIEVFGKAGEIEKMDQHFLKMKHLGVKPNSITYCSLVSAYSKVGCIDKVDSIMRHVENSDVVLDTPFFNCIISAYGQAGNLKKMGELFLAMRERKCEPDNITFACMIQSYNTQGMTEAVQNLENMMISAKSSLGTKLIGC
Glyma14g01540	6.73	7	105	1.09035	0.903083	1.12386	0.703187	no original description	MEGNMEKKSPCMNVIKLDGKEIKMPGLNMDDINKQSNMVVSVSTTPQAASALKKSSSERRSCLCSPTTHVGSFRCRHHRSGMSHASSVGSNLSAMSSNDSLQSQY
Glyma14g02940	6.43	18	281	1.01444	0.938101	-1.52911	0.0768318	weakly similar to ( 166)AT4G20440| Symbols: SMB | SMB | chr4:11022854-11023627 REVERSE no original description	MSMSKSSKMLQYINYRMRVTIQDGRQLVGKFMAFDRHMNLVLGDCEEFRKLPPAKGKKPAEGGDREDRRTLGLVLLRGEEVISMTVEGPPPPEESRSKAVGAAALAGPGIGRAAGRGIPPAPVVQAQPGLAGPVRGMGGPAPGMMQPQISRPPQLNAPPVSYPGGGPPVMRPPGQMPGQFAPPPMARGPPPPMPPGQFAPQRPGGPPPQFQVPPQFGQRPMGPPPPGQMVRGPPAPPRPGMPAPPPPRPGMPPPPGSGVPVFGPPRPGMPPPPNPPNQQQQ
Glyma14g11070	7.52	10	134	-1.01056	0.979103	1.19488	0.765921	weakly similar to ( 200)AT5G11950| Symbols: | Encodes a protein of unknown function. It has been crystallized and shown to be structurally almost identical to the protein encoded by At2G37210. | chr5:3855073-3856816 FORWARD no original description	VKRNIDLVYGGGSVGLMGLISQRMYDGGCHVLGLVGIPKALMPLEISGEPVGEVRIVSDMHEPKAAMAQGADAFIALPGGYGTMEELLEMITWAQLGIHKKQVGLLNVDGFIKRGARNILVTASPAKELMMKME
Glyma14g11100	6.35	8	127	1.08935	0.67137	-1.06228	0.897091	very weakly similar to (85.9)AT5G11970| Symbols: | similar to unknown protein [Arabidopsis thaliana] (TAIR:AT2G19460.1); similar to unnamed protein product [Vitis vinifera] (GB:CAO45667.1) | chr5:3863290-3863607 REVERSE no original description	MEDFNYNRSRSHGNGQMMKMERYYGGATPPPRPCDLRSYSVSYAQAQMGPNNYNNKDLKMMKKGKSMSSRATSISKSWSFATDPEIQRKKRVASYKMYSVEGKVKGSFRKSFRWLKDRYWQVVYGWW
Glyma14g19890	6.19	6	98	-1.27441	0.586911	-1.27981	0.3554	very weakly similar to (96.7)AT4G27090| Symbols: | 60S ribosomal protein L14 (RPL14B) | chr4:13594110-13595193 REVERSEweakly similar to ( 110)RL14_PEA no original description	MPFKRYVEIGRVAQINYGKEYGRLVVIVDVIDQNRKKMMAHHPDMVRSQVNFKRLSLTDIKIDIKRVPKKKDLVKAMEDMLRPKREGHPSMILIGQGF
Glyma15g00930	7.03	35	499	1.18335	0.638001	1.43745	0.122057	highly similar to ( 832)AT1G48900| Symbols: | signal recognition particle 54 kDa protein 3 / SRP54 (SRP-54C) | chr1:18088699-18091411 REVERSEhighly similar to ( 784)SR542_HORVU no original description	MVLAELGGSISRALQQMSNATVIDEKVLNDCLNVITRALLQSDVQFKLVRDLQTNIKNIVNLDDLAAGHNKRRIIQQAVFNELCKILDPGKPSFTPKKGKTSVVMFVGLQGSGKTTTCTKYAYYHQKKGWKPALVCADTFRAGAFDQLKQNATKAKIPFYGSYMESDPVKIAVEGVERFKKENCDLIIVDTSGRHKQEAALFEEMRQVSEATKPDLVIFVMDSSIGQAAFDQAQAFKQSVAVGAVIVTKMDGHAKGGGALSAVAATKSPVIFIGTGEHMDEFEVFDVKPFVSRLLGMGDWSGFMDKIQEVVPMDQQPELLQKLSEGNFTLRIMYEQFQNILKMGPIGQVFSMLPGFSAELMPKGREKESQAKIKRYMTMMDSMTNEELDSSNPKLMNES…
Glyma15g02720	6.6	19	289	1.013	0.967162	1.25683	0.0254833	moderately similar to ( 210)AT1G55170| Symbols: | similar to unknown protein [Arabidopsis thaliana] (TAIR:AT3G14750.1); similar to hypothetical protein [Vitis vinifera] (GB:CAN71449.1); contains InterPro domain Prefoldin (InterPro:IPR009053) | chr1:20584245-20585373 FORWARD no original description	MASRHRVHREPLNARRGYPPEGPYARVAPMPRPLPPIPPHPSVLEEELEFQHAEMRRLVADNRRLIDDRMALQRDLGAAKEELHRMNLAIGDIRAEHEAHSRELVEKGMKMEADLRANEPLKNEVMQLRSEVKKLNNLKQELTGKVQTLTQDVARLQADNQQIPMMRAKIDGLHQELMHARTMVDYEKKANMEFMEQRQSMEKNLVSMAREVEKLRAELASADSRHWGAGMSGMTGGPYGTKFGSPEGFPAPYADGYGSVHLGAADKGPMYGAGAASRKEHEKPHMNRR
Glyma15g05180	6.16	9	147	-1.22473	0.187865	1.06171	0.550662	very weakly similar to (97.4)AT1G60870| Symbols: MEE9 | MEE9 (maternal effect embryo arrest 9) | chr1:22413377-22413892 FORWARD no original description	MEALLSQFTFLSDQALQDKNFDPSTIEDLMKLFEIESYKAWAAAELEQEKEVEEAEAGMEEAEEYLDSVMESAMDEFRRFEEELERMSKNEMEGLVQTAERARKMGNLMEKGASIASKKYIEAALNSATASMKSAWKGLSSGKVHPS
Glyma15g05510	7.37	7	96	2.92624	0.0247133	2.40513	0.0228192	no original description	MKKMVVAMMLIFLLISTQMESVEPDAADCLDGCTTACVQSDSRLQARCDRKCSIRCGPGNQPNPKYFFFILTMLYIDISWMDKKKEKDKMIFCLLT
Glyma15g07120	7.96	9	114	1.23628	0.513656	4.94118	0.0274046	very weakly similar to ( 100)AT4G27280| Symbols: | calcium-binding EF hand family protein | chr4:13663776-13664168 REVERSE no original description	MASKRNTVVFEDYFPAMMEKLGTEGFMKELTNGFQLLMDREKKVITFESLKKNSALLGLEGMSDDELRCMLREGDLDGDDALDEMEFCTLMFRLSPALMNNSKELLEEAIYPFH
Glyma15g08080	6.12	9	148	1.33945	0.0962428	1.17236	0.425715	weakly similar to ( 179)AT1G53035| Symbols: | similar to unknown protein [Arabidopsis thaliana] (TAIR:AT3G15358.1); similar to unnamed protein product [Vitis vinifera] (GB:CAO69750.1) | chr1:19765534-19765986 REVERSE no original description	MRRRMASSAFMVICILHSVIAMTCGALMMFYMKEVYTFGHGVQAATKLLGSTPHDQLLIKTSDSFSGLLLVAIGFLLFMVSFVKDRDFQVFFAKGCTLLHLFMAMWRVYFERKVEDLALDWLRQTVGDFLLALSWVFFLVYSWREKYD
Glyma15g11120	8.35	41	492	-1.22246	0.634876	-1.46525	0.121268	weakly similar to ( 126)AT3G06130| Symbols: | heavy-metal-associated domain-containing protein | chr3:1853054-1854679 REVERSE no original description	MSKEEFLKIQKCVLKVNIHCDGCKNKVKKILQKIDGVFTTEIDAEQGKVTVSGNVDPNVLIKKLAKSGKHAELWGAPKGNNNIQNNMANQFKNMQIDNNGKGGGNNKGQKGGGGNNQPKGNNQQGQNPQQQLQQHLQQLQHMKGFQDLKLPQFKDMKLPNPNPNPNPKAVKFSLPEEDDLSDDELDEFDDEFDDEFDDDEMDDPQHPLNKMMMMKPPMGGKPPVGNVPMGNGASMMLNSMMNAQKGGNGGGGNGKKGGGGGGGGPVPVQVHNMGGGNEGKNGNGGKKGGGGNNQNQGGGNKNNGGKNGGGMPEGKNGNSKNNGGGGIPNNNGNGGKKGNNGMGEGVQAMNMFPNMGGHNPSMVGANMGPMNNMSIPMGNMPMTQMGNIPAVQGLPAAAA…
Glyma15g13630	6.77	9	134	-1.3079	0.68207	1.27075	0.618871	weakly similar to ( 142)AT3G24060| Symbols: | self-incompatibility protein-related | chr3:8689596-8690039 REVERSE no original description	LTLCLASSFIMMMATVQRARLLFATNEYYVRVINGFSDNSSVPLVIWCASEEMDLGGRALQEHDDFSWVMRPNFWSSNRMKCTMKWDNTRKSFEAFKASRDTDRCGIHRMCSWMVTQDGFYFSNDEVNWRKDFX
Glyma15g15140	8.08	8	100	-2.33907	0.0743316	-1.10351	0.752333	no original description	MVLQTHITAMAAEARMDQPSTVAIILTTATGMTTHTTTVNALFITVALSMVMATGHISRVALTPQQGTTMVVVMIINYLYLIQYMLASWAKYIICYATLY
Glyma15g25450	6.32	6	96	1.09555	0.745268	2.02827	0.272125	weakly similar to ( 155)AT3G08530| Symbols: | clathrin heavy chain, putative | chr3:2587177-2595417 REVERSE no original description	MAAANAPIAMREALTLPSIDINPQFITFTHVTMESDKYICVRETAPQNSVVIIDMNMPNQPLRRPITADSALMNPNSRILALKGWLLFRCILLMNX
Glyma15g34440	9.09	10	111	1.53164	0.523038	2.08709	0.21432	no original description	MMGDELPMKEVEMEIAALDSDRDGLLSLEDFIALMEAGGEDCGFITPKSLKRMLKKMGESKSMIKQFDLNGDGIQNYDAVPDAKKDVLYLTMLMRSYVVSWTARPRFLMIA
Glyma15g37640	6.25	8	129	-1.13307	0.687753	1.25024	0.418371	weakly similar to ( 130)AT2G07340| Symbols: | prefoldin-related KE2 family protein | chr2:3045641-3046603 FORWARD no original description	MADEANRTAFLEIQSRMIDTTGKIKQVQTQMRSKEAEKKRAFLTMEELKQVPDDTNVYKSIGRMFVLETKATLMNEQENKFKDGEASITALQSSKEYLEKQMAEVETNLRELLQQDPGLARQIMSMNVV
Glyma15g39690	7.48	11	148	-1.96195	0.101049	-1.17345	0.67773	no original description	MSSSEGVVELGIEFSEANNFLLMSLMEETQEEEYDGDDRLVSMIQSLEAEISDTEMSQMYEMSHVDDQDCSTSVSGPDHWVDMELISSLTFDGMNAWIPCGDEMMEHAAMEYEAGNDINDFQLCYGVFLEQQYRETNYLAQGPCDAVF
Glyma16g01270	6.03	70	1162	1.06614	0.686571	-1.1797	0.337304	moderately similar to ( 476)AT1G72390| Symbols: | similar to unnamed protein product [Vitis vinifera] (GB:CAO45587.1) | chr1:27249117-27254880 FORWARD no original description	MSLENIVKDIPSITDKSWTYGDLMEVESKILKALQPKLHLDPTPKLDRLCESPLPTKLNLPRKRLKNMPEFAVTSTNKIHGKKVCIDRVQESSISRVGDVGNTASNAIVQQTHENPAMQNLSPNVAMALRSKNFIPDSSIPNFPMMTHQSRYAMAVGTQRSLQEQGPAPSINSSVASPATQYADNANSGASLLGKRDNQDGQASPLSNIAKRMRPGSTVVDAMQHQQIGSHVEALQGSDMNWQNSLQQQPMARGIQYASGGIQKFPQQVFEGGANQETGAIPFASSQQGMRLVAKEEQFEMEKLDGAEINCNKSDMEMEMNNLDPQQLRLQQRLPQHAFMRPNFPQAAWNSLGQHMGKETKKEDQLQKRKSVQSPRLSSAALPHSPLSSKSGEFSNGAV…
Glyma16g02000	6.22	13	210	1.07183	0.831175	1.04051	0.951673	weakly similar to ( 133)AT5G54160| Symbols: OMT1, ATOMT1 | ATOMT1 (O-METHYLTRANSFERASE 1) | chr5:21999301-22001393 FORWARDweakly similar to ( 134)COMT1_CATRO no original description	NFEGIFTNFGFGHETNSQFDMLAKTKASVSIIQRYQLKDAILEGGSPFNRIHGKHVFEDFNMNSSFNQLFMATMTNHATLIMNKIVESYKGFENINKLVDVGGGLGVTLNIITSKYPHIKGINFDLPHAIEHASPSPRGDMFESVTQGDAILMMFFHMNRRQQMQFDVLMMTTNPGGKERSEEEFMDSVALDSHALSLTYGLWSSSNEIK
Glyma16g02310	7.18	15	210	1.09039	0.651061	1.52513	0.341582	weakly similar to ( 104)AT4G00850| Symbols: GIF3 | GIF3 (GRF1-INTERACTING FACTOR 3) | chr4:357675-358928 FORWARD no original description	MQQTPPMIPMMPSFPPTNITTEQIQKYLDENKKLILAILDNQNLGKLAECAQYQAQLQKNLMYLAAIADAQPQTPAMPPQMAPHPAMQPGFYMQHPQAAAAAMAQQQQQGMFPQKMPLQFGNPHQMQEQQQQLHQQAIQGQMGLRPGGINNGMHPMHNEGGNSGGPPSATGPNDARGGSKQDASEAGTAGGDGQGSSAAAHNSGDGEEAK
Glyma16g02510	7.26	9	125	2.05345	0.0277278	4.62706	0.0228193	weakly similar to ( 147)AT2G46600| Symbols: | calcium-binding protein, putative | chr2:19143141-19143548 FORWARD no original description	MESSHNMRQSTMETEFEDLLPVMAEKLDVESFVSELCGGFKLLSDPETGLITSESLRTNSALLGMEGMSKEDADAMVRQGDLDGDGKLNETEFCILMVRLSPGMMEDAESWLEKAIDEELRKSSS
Glyma16g03940	6.49	10	155	1.65484	0.277959	1.00484	0.992192	moderately similar to ( 276)AT1G63800| Symbols: UBC5 | UBC5 (UBIQUITIN-CONJUGATING ENZYME 5); ubiquitin-protein ligase | chr1:23671551-23672666 REVERSEmoderately similar to ( 271)UBC4_WHEAT no original description	MSSPSKRREMDLMKLMMSDYKVEMINDGMQEFYVHFHGPNESPYHGGVWKVRVELPDAYPYKSPSIGFINKIYHPNVDEMSGSVCLDVINQTWSPMFDLVNVFEVFLPQLLLYPNPSDPLNGEAAALMMRDRATYEQRVKGGTLEQAVFSPQGSG
Glyma16g13540	6.77	9	134	-1.41342	0.466617	1.01143	0.964292	no original description	MVDEMKALNKKLEETETAIEDYFKPLDKEAEIIMKMQIQGEERTSEIMMQALEKQATLQQAEAEKNASKHQVNHAETNMNESEMMEEEKTLTEMLKALQQEVLLEKADTESDVNAHQADNSPINLSSASTTTSK
Glyma16g21670	10.08	12	120	1.59861	0.324419	2.13747	0.193367	no original description	FKMFSYLESFYVGMMGGELPMKEAKMAIAALDSDGDGLLSLEDFIALMEARGEEQKLNDLKVAFDMYDTESCGFITPKSLKRMLKKMGGSKSIDECKSMIKQFDLNGDGVLSFEELRIMM
Glyma16g24600	7.2	9	126	-1.07688	0.701415	1.30919	0.198498	very weakly similar to (88.2)AT4G36420| Symbols: | ribosomal protein L12 family protein | chr4:17203721-17204260 REVERSE no original description	MMGLTLLKVMDMVEVMREKCGVNELPIAMVMVPGMGVPRGVPKGGGGGTVGVAEVKAAEKTAFDVKLEGFDVAAKIKVIKEVRMFTSLGLKEAKDLVEKVPAVLKKGVTKEEVESIIAKMKEVGAK
Glyma16g26560	6.47	13	202	-1.03302	0.907113	-1.11802	0.378211	no original description	MEAHSPVIAKKLWNVLRITFFMIRKGLVSKRKLIMDMNLMMKKGKLLRKSMSNFMSSHHHHHHHHSKSLARGYGMQEYEFSCSNSPSPVFFHVPKKKHHFNFPCMNTTEVVEEPRPVVLVPNMTPEYTFNHRFDNASDFAPGERISPFTVRISNYSSEDEENEQEGGNGNAQVDDQAEAFIRRFYEQLRMQSRMQLLEYQEM
Glyma17g01350	6.93	7	102	-1.20545	0.549496	-1.01158	0.975608	weakly similar to ( 111)AT4G04030| Symbols: ATOFP9, OFP9 | ATOFP9/OFP9 (Arabidopsis thaliana ovate family protein 9) | chr4:1934065-1937829 REVERSE no original description	MVQERLDQMIRARHVERRRQHDREGTKFVVMVAMEKSSYDPREDFRESMMEMITAKHLQDAKDLRSLLNYYISMNSDEYHSLILEVFHEVCTSLFLSCKCYC
Glyma17g02490	6.4	8	126	-1.05129	0.828564	1.22096	0.132941	no original description	MGKNKKVEQQNKVIIVEYKVSMYCNACERTIAKVISKCKGVEKFITNMNEHQVVVTGRIDPMKVLEKLKKKTGKKVEIVSKMDDHEEPDDESDKLVIMHQFAPENDSCINIQTMMMFSDENPNACA
Glyma17g13820	10.07	14	140	-1.06612	0.836452	-1.27442	0.567815	very weakly similar to (91.7)AT1G76650| Symbols: CML38 | CML38 | chr1:28771803-28772336 REVERSE no original description	MMRGAEYERVLRYFDEDGDGKISPSELRNRIAMMGGEVMLKEAEMAIEALDSDGDGLLCLDDLMNLMEAAGEEEKLKDLREAFDMYDTERCGFITPKALKRMLKKLGESKSMVECKVMISRFDLNGDGMLSFEEFRIMMK
Glyma17g17180	6.34	9	143	-1.19236	0.445725	1.20659	0.556994	weakly similar to ( 154)AT3G61460| Symbols: BRH1 | BRH1 (BRASSINOSTEROID-RESPONSIVE RING-H2); protein binding / zinc ion binding | chr3:22752676-22753188 REVERSE no original description	MANVFLQVLSVLGFIMRLITILLCYMGFQDFFESNITRPKRAVSVVLMREILPVVKFSEMEMAVEAVESCAVCLYEFEGEDEIRWLTNYRHIFHKRCLDHWMGYDMRMCTLCRTPSIPHHMQAAFNDKLWAASGIPDFYYYHH
Glyma17g29570	6.8	7	104	-1.03336	0.857274	-1.53675	0.0562787	weakly similar to ( 127)AT4G31115| Symbols: | similar to unknown protein [Arabidopsis thaliana] (TAIR:AT5G04440.1); similar to predicted protein [Physcomitrella patens subsp. patens] (GB:EDQ77866.1); similar to Os08g0521800 [Oryza sativa (japonica cultivar-group)] (GB:NP_001062277.1) | chr4:15130249-15131853 FORWARD no original description	MLSCKFEGSEVVKEQNDHFSAFMRNQMTWGGAGAESFLEVDVKLNLTLEIYTQPFTMMPTSAVEGPGNIMMQALVDKLVPLLLQQMLQDYDEWVRKQSYSLKSF
Glyma18g01730	6.76	14	208	-1.98297	0.0814846	1.62754	0.132506	no original description	MGRNHFQQQHCADGSMWMESQGQQQSYAFQEESWSPDNNYGHNHKQFPGMHMNMNNNNNNNKRLGAFAAVDSDFSMQKHHHGHGNGVGAMHMNMNRHGGKLGGMFQEGMHSDHHGGRKFPFGGHHHGNNNASQHHFPNHGGHHEYFSEESEEYEESYAEEHVGGVTAKVDEMRYERHNWGGGDTRYANPYGMNMNHKPHKFQWTAKGV
Glyma18g05930	9.52	16	169	-1.15476	0.513412	-1.14075	0.692136	very weakly similar to (92.0)AT5G48670| Symbols: FEM111, AGL80 | AGL80/FEM111 (AGAMOUS-LIKE80); DNA binding / transcription factor | chr5:19756051-19757016 REVERSE no original description	MTRKKVQPAFISFDSARKLTYKKMKKGMLKKIDEPSTLCGIEACAIVYSPRILRQRVLEKFMSMPELEQSKKMVNQESFTAQSIMKGNKQMMKLMKDNRRRSRARPDNNMTIANLNFLSRMVDQNLKDIDKRMETLKMQTPALNYALGSDMNTAEPMQNLWFMDFLNNX
Glyma18g05960	6.96	11	159	1.58422	0.0387371	1.21048	0.587754	weakly similar to ( 130)AT5G48670| Symbols: FEM111, AGL80 | AGL80/FEM111 (AGAMOUS-LIKE80); DNA binding / transcription factor | chr5:19756051-19757016 REVERSE no original description	MATGKLKLTFVANDSQRKTVCKKRKQSLLKKTEELSTLCGIEACAIVYGPNDHRPEIWPSESGVKNVLGKFMNKPQWEQSKKMMNQESFIAQSIMKSKDKLQKVVKENKEIEMSLFMAQCFQTGMFQPDINMTAADMNVLSSEIEQNLKDIDKRMEMLK
Glyma18g08370	6.21	9	146	1.67236	0.0181056	-1.03648	0.884927	moderately similar to ( 269)AT4G12590| Symbols: | similar to hypothetical protein [Vitis vinifera] (GB:CAN72892.1); contains InterPro domain Protein of unknown function DUF850, transmembrane eukaryotic (InterPro:IPR008568) | chr4:7451288-7452973 REVERSE no original description	MFSDPNMAMDMMKKNLSMIIPQTLTFAWVNFFFSGFVAAKIPFPLTQRFRSMLQNGIDLSTVDVSYVSSRSWYFLNLFGLRGLFSLILGEENAVDDTQRMMQMGGFGFDPSKGLSAEKDNLDITQHDWALPNFEQRAEAVLRKVAS
Glyma18g13120	7.14	8	113	-2.0701	0.0964768	1.55314	0.0811534	no original description	MQIPCSWNHHNMVKAVHLPTTACEIHGTNMVCSIIQIHRGLSSNSVDTFNNVIEAVMTKMEAQLDPLLDRFHAPPTFIIYMFLFWAVAIRKQRGIPMSALWMWMTNTSEKDLR
Glyma18g38800	7.76	9	117	1.89402	0.42439	2.08994	0.066368	very weakly similar to (85.9)AT1G76650| Symbols: CML38 | CML38 | chr1:28771803-28772336 REVERSE no original description	MGKQVGFEDVLRYFDEDGDGKVLPSELKHGLGMMGGELPMKEAKMAIAALDSDGDGLLTFEMYDTERCGFITPKRLKKILKKMGESKSIDECKSMIKQFDLNRDGVLSFEEFRIMMQ
Glyma18g41530	8.28	12	146	-1.03418	0.853314	1.00155	0.996389	very weakly similar to (98.2)AT5G59030| Symbols: COPT1 | COPT1 (COPPER TRANSPORTER 1); copper ion transmembrane transporter | chr5:23851171-23851683 REVERSE no original description	MYMSPGQDMSSMSNDRNNMSMMMHNSFYWGKDAIVLFPRWPENNVGMYILALIFVFFLAMAVEVLSNQPLLKPGTSPLVGGLIQAGVHLFRISFVYMVMLAVMSFNAGIFIAAVVGHTLGFFVAKFRALSIANRKDKGSSSILNNV
Glyma18g43190	6.87	20	292	1.70022	0.21818	1.82986	0.205213	weakly similar to ( 162)AT5G01380| Symbols: | transcription factor | chr5:155783-157450 REVERSE no original description	MEGHHLHHRQQQLQQHHHPHHNITTSNVDATDRFPQWSIQETKEFLVIRAELDQTFMETKRNKQLWEVISNRMKEKGFHRSAEQCKCKWKNLVTRYKGCETMEPEAMRQQFPFYNELQAIFAARMQRMLWAEAEGGSNNKKKGMHLSSDDEEEGNEEMMSEGDHKGNIIISKKNKKKGKMVIGVGGSGNNNNNSSSSSNNLESLKEIMDEFMRQQMQMEAQWMEAFEARENERRLKEMEWRQTMEALENERLMMDQRWREREEQRRIREEVRADKRDALITALLNKLRREEM
Glyma18g44300	6.9	8	117	1.02404	0.91823	-1.00282	0.992605	very weakly similar to (95.5)NLTP_CICAR no original description	MASMKVTWVVVIMCMAVVGAPMMAQAMTCNDVTVNMAQCLSYLMQGGTPSTLCCSGVKNILGSAVTTVDKQTVCNCLKADAARYNINDQYAQALPGFCKVNVPYKISRSTNCASIRF
Glyma18g46940	6.99	10	144	-1.39686	0.139052	1.45758	0.177207	moderately similar to ( 261)AT1G63800| Symbols: UBC5 | UBC5 (UBIQUITIN-CONJUGATING ENZYME 5); ubiquitin-protein ligase | chr1:23671551-23672666 REVERSEmoderately similar to ( 252)UBC4_WHEAT no original description	MSSPSKRREMDLMKLMMSDYKVEMINDGMQEFYVQFHGPNDSPYHGGVWKVRVELPDAYPYKSPSIGFINKIYHPNVDEMSGSVCLDVINQTWSPMFGLVNVFEVFLPQLLLYPNPSDPLNGEAAALMMRDRPSYEQRVKGLIC
Glyma18g47650	7.41	8	109	-1.58746	0.0455804	-1.35323	0.152804	weakly similar to ( 119)AT1G65295| Symbols: | similar to unknown protein [Arabidopsis thaliana] (TAIR:AT5G01015.1); similar to unnamed protein product [Vitis vinifera] (GB:CAO22991.1) | chr1:24255230-24255717 FORWARD no original description	MMPAHGLIISLIFVSILANEASLVHEANGSFPMVPLVEAGKMEMMMVMNESRRKLGSFQICALCTCCGGAKGMCLPSPCCYAINCNIPHRPFGFCSFTPKTCNCFGCHL
Glyma18g49880	6.55	11	169	-1.0927	0.701511	-1.09154	0.885983	moderately similar to ( 237)AT5G15390| Symbols: | tRNA/rRNA methyltransferase (SpoU) family protein | chr5:4995336-4997258 FORWARD no original description	MMPMHDSSFTIIEAYKDNRHVSMGAEKWLDIELWDSTKECFKMLKSRGYRIATTHVGMDAVSILDLDWSSPTTIVVGNENRGISDEALELSDLHCSIPMAGMVKSFNVSVAAGILMHHAVCDRISRMGYHGDMTVEECQILLAEFLLRHSKSSISIVEDYAMRKAVTLT
Glyma18g52180	6.67	9	136	-1.13434	0.843155	1.29777	0.431088	weakly similar to ( 135)AT5G14070| Symbols: ROXY2 | ROXY2; thiol-disulfide exchange intermediate | chr5:4541917-4542339 FORWARD no original description	MHYQVEPAWSYYMRVRRSMEEDQMERVARLASQSAVVIFSVSSCCMCHAMKRLFCGMGVNPTVHELDQDPKGKDMESALMRLLGIGIGNGINSTASAAVPVVFIGGKLVGSMDRVLAFHISGTLVPLLKQAGALWL
Glyma18g52240	6.12	6	99	-3.07619	0.146397	-1.03842	0.969828	very weakly similar to (90.9)AT3G55240| Symbols: | Overexpression leads to PEL (Pseudo-Etiolation in Light) phenotype. | chr3:20484853-20485682 REVERSE no original description	MGESSNSSSASYIHMVHHLIEKCLTFHMSKEECMEALSKHANIKPVITSTVWNELEKENKEFFEEYAKGKSKEDRMSEEETTQMLQKMISDSSKGAAKD
Glyma19g01860	6.06	6	100	1.49636	0.0452548	5.79324	0.0176147	no original description	MMEEMKVSRRVEWWQNMMFPVRRVWFVVAKRLGIRKTGLLKLSNDVRACEYEDIQVMWEILNRNESEFGRSSSTRKGNNKKGHCWKLLRWARCAPCMCRT
Glyma19g15780	6.34	9	143	-1.11525	0.691263	-1.13032	0.546885	weakly similar to ( 110)AT3G48890| Symbols: ATMAPR3, MSBP2, ATMP2 | ATMP2 (MEMBRANE STEROID BINDING PROTEIN 2); heme binding / transition metal ion binding | chr3:18140654-18142338 FORWARD no original description	MGLYTSVMEEISFYTGLSPAAFFTILAMMVVVYRTVSGMFVSPEDYNKPPVVSARANSRLDESEPPREPVQLGEITDRELRAYDGSDPSKPLLMAIKGQIYDVSNGIFMVPEDHMQCLQERNVAEPLHSCLLNLMTLMGTSKV
Glyma19g25270	6.55	11	169	-1.10224	0.706565	1.6323	0.0199518	moderately similar to ( 301)AT1G63290| Symbols: | ribulose-phosphate 3-epimerase, cytosolic, putative / pentose-5-phosphate 3-epimerase, putative | chr1:23475760-23477255 REVERSEmoderately similar to ( 311)RPE1_ORYSA no original description	MGVTPKIAPSMLSSDFANLASEAQRMLHFGADWLHMDIMDGHFVPNLTIGAPVIESLRKHTKGYLDCHLMVTNPLDYVEPLAKAGASGFTFHVETSKDNWEELIQRIKSHGMTPGVALKPGTPIEEVYPLVEAGNPVEMVLVMTVEPGFGGQKFMPEMMDKVSSLLCYA
Glyma19g30640	6.08	23	379	-2.28942	0.235552	-1.20023	0.730627	moderately similar to ( 414)AT5G07050| Symbols: | nodulin MtN21 family protein | chr5:2191534-2193417 REVERSE no original description	MEGDGYCGSFFQRCKPYIAMVSLQFGFAGMNIITKVSLNRGMSHYVLVVYRHAFATAAIAPFAIVLERKVRPKMTFLMFMQIFVLGLLGPVIDQNLYYAGLKFTSPTYSCAISNILPAMTFVMAAIFRMEKLDMRKVRCQAKVIGTIVTVAGAMLMTLYKGQVISFLGSKYMHHPRNYVPENTTDSGEKDWFKGSILLILATLSWASFFILQATLVCALGTLQSIAVTFVMEHKPSVWTIGWDMNLLAAAYAGIISSGITYYVQGIVMQKKGPVFVTAFSPLMMIIVAIMGAFILAEKIYLGGVVGAILIVMGLYSVLWGKHKENKEKEAETTMEVMKCCSENGRLETVVEDAETNNDIEMQKGEASRELRVVISAPKA
Glyma19g30960	6.5	16	247	1.05824	0.754211	-1.00988	0.970554	weakly similar to ( 187)AT1G01020| Symbols: ARV1 | ARV1 | chr1:7315-8666 REVERSE no original description	MGYRCIQCGCPVKTLYVQYSPGNIRLMKCENCKAVADEYIECEIMILAIDLILHKPKAYRHLLHNVINQETMKFQGLLWKLAVIFLFFEYYRCLILESSKGKLDSSMSVSPSVSICWKVLMDVLFGNLMFLLTFFFMVMMLFHVSITITRCIDLLLALMISSYFKIFFIAMMVWEFPSSVIFIIELFCLSSNAATLKVMTDSTMSRCVWTCFSAYAIKFIITWILELLPGQLMQGWSQMPFTFYKPA
Glyma19g35470	6.09	7	116	1.06359	0.903707	1.10909	0.806002	very weakly similar to (99.4)AT5G26594| Symbols: ARR24 | ARR24 (ARABIDOPSIS RESPONSE REGULATOR 24); two-component response regulator | chr5:9269285-9270257 FORWARD no original description	MTIYSTERFIKLLESVGVKNQGVENGQEAVDIHCHGQIFDLILMDMDMPIMNGIEATKELRSMGIGSMIVGVSSRCTEAEIRKFMEAGLNDYHEKPLNNAKLSSILDKINPSFTRN
Glyma19g35480	7.48	8	108	1.01002	0.979424	-1.1391	0.527142	weakly similar to ( 120)AT5G26594| Symbols: ARR24 | ARR24 (ARABIDOPSIS RESPONSE REGULATOR 24); two-component response regulator | chr5:9269285-9270257 FORWARD no original description	MEPRQLTALIVEDDMVIRMVHQKILNSVGLKIQVAENGKEAIEIHGSGQSFDLILMDRDMPVMNGIEATKTLRSMGINSMITGVSTRSVAAHIREFMEAGLDDYVEKP
Glyma19g40110	6.77	9	134	-1.05841	0.604354	-1.06431	0.810334	very weakly similar to (84.0)AT1G56300| Symbols: | DNAJ heat shock N-terminal domain-containing protein | chr1:21082687-21083833 REVERSE no original description	MFGTVEHDEIRRAYRKMDLWYPDRWIKDPKLALEAKKRFQRVQEAYSVLSNKGKRRIYDAGLFGLIGEDDDEGFVDFMQEMASTMQKVRPKDEKGMLEDLQGLLMVMMADNEGMGKSGLSWNSSPCPTKRTRIL
Glyma19g42500	7.47	28	376	-1.71357	0.0169968	-1.49485	0.13148	no original description	MMYNHKYPINQNMMQLGGKDNNKSQNQKGQKEKGAGGVGQLAHFPNIKGIQDLKVPAKEQKSVKFNLPEDEFDASDDGFDEYDDNFDEYDEEGLSHGHPLNQKKMMPMMGDGRGPHGPPAMMNGPAINHNHKGNSGGSSVKKADVIDQAMMFKGKGGNFNEAYGGKKGSSNQKVEKKKGDDHKKKNGLLGRFLGFGKKKSKKGELEEATNTNNSKNGGENKKGKEGKKGEGKLEDHANNDFDFHDYGHTLTHPKNNVKEGQMGPGPIMGHQMKNIPSVQGLPAMNDDGGYYQGVQMQHAPYNNLQQQHYMGMMMNQQQHQHQQANLNNNMYPTSMMYGRSHPSMNYMPPPPMPSHPMADPITHTFSDENVESCSIM
Glyma19g43370	6.08	9	149	1.265	0.48583	2.12859	0.259829	weakly similar to ( 162)AT2G27030| Symbols: CAM5 | CAM5 (CALMODULIN 5); calcium ion binding | chr2:11539797-11540138 FORWARDweakly similar to ( 159)CALM3_PETHY no original description	MKDALREEQIGEFLEAFCLFDKDGDGCITIEELSTAIRSLDENPTVEELQIMMNEVDMDGNGTIEFGEFLNLMARKMKETEAEEELKEAFRVFDKDHDGYISPSELRSVMRTIGEKVTDEEVEQMVKEADLDGDGLIDYEEFVRMMLAD
Glyma19g43580	6.7	14	210	-2.00542	0.160285	2.42367	0.0776522	weakly similar to ( 120)AT5G28640| Symbols: GIF, GIF1, AN3 | AN3 (ANGUSITFOLIA3) | chr5:10647835-10649624 REVERSE no original description	MQQHLMQMQPMMAAYYPNNVTTDHIQQYLDENKSLILKIVESQNSGKLSECAENQARLQRNLMYLAAIADSQPQPPTMSGQYPPSGMMQQGAQYMQAQQQAQQMTPQQLMAARSSLLYAQQPYSALQQQQAMHSALGSSSGLHMLQSEGSNVNVGGGFPDFVRGGSSTGEGLHSGGRGIIGSSKQEMGGSSEGRGEGGENLYLKVADDGN
Glyma19g45350	6.13	10	164	-1.48643	0.397481	-2.43201	0.18776	moderately similar to ( 206)AT5G43750| Symbols: | similar to unnamed protein product [Vitis vinifera] (GB:CAO71280.1) | chr5:17597327-17598372 REVERSE no original description	LSLTSMKILEINMPLMAMTLMILCIYGIYDDHHTYHEGEQKGTFWGSIAEEMAAAEPPTGFQGIISWLFPPAIALGVYFNVPGEYLYIGAGIFTIIFCIIEMDKPDKAHHFEPHIYNMEMGARDKLINDYNTMSIWEFNEKYGDLWDTTIIVTRVWCTVRKWLQ
Glyma20g00780	6.69	19	285	-3.02895	0.0455072	-2.35667	0.026978	weakly similar to ( 176)AT1G10820| Symbols: | similar to unknown protein [Arabidopsis thaliana] (TAIR:AT1G60670.2); similar to unnamed protein product [Vitis vinifera] (GB:CAO15416.1); contains InterPro domain Homeodomain-like (InterPro:IPR009057) | chr1:3601438-3604651 REVERSE no original description	MAAGSNTGFHCDDMGSALNWHGAVSSLPEMVPMGNYFGLNSNTSGMTMMMYSGNSSVNNNVYEPVTSQPGNASGSSLPLDSAPGLRNEERLAAEWSVDEQCKLEEGLAKYDDEPSFMKYIKIASTLHDKTVRDVALRCTWMTRKRRKPEEPMVKMVNNRKDKLVKSSSKQYFQSTPTPSMTTYSLISNHMNKSQGILWQDGISGPMRQLLEQNAQAFSQISANLSTLKFQDNIELFCQTRRNINTVLNEMRTMPGIMSQMPPFPVSMNEELASSIFPNKSEAANY
Glyma20g18010	6.02	38	632	-1.08303	0.393203	-1.33132	0.298443	nearly identical (1038)AT5G04810| Symbols: | pentatricopeptide (PPR) repeat-containing protein | chr5:1390050-1393761 FORWARDmoderately similar to ( 205)RF1_ORYSA no original description	IFQPARKEYGLMVKYYGRRGDMHHARQTFESMRARGIEPSSHVYSSLIHAYAVGRDMEEALHCVRKMKEEGIEMTIVTYSIIVGGFAKMGNADAADHWFEEAKEKLPSLNAVIYGGIIYAHCQICNMDRAEALVREMEEQGIDAPIDIYHTMMDGYTMIGNEEKCLIVFDRLKECGFFPSVISYGCLINLYTKVGKVSKALEISKMMKMSGIKHNMKTYSMLINGFLKLKDWANAFSVFEDFTKDGLKPDVVLYNNIITAFCGMGNMDRAICMVRQMQKERHRPTTRTFLPIIHGFARAGEMRRALEIFDMMRRSGCIPTVHTYNALILGLVEKRQMTKAVAILDEMNVAGVGPNEHTYTTLMQGYASLGDTEKAFQYFTVLRNEGLEIDVYTYEALLK…
Glyma20g22280	6.59	28	426	2.24934	0.0463137	2.98927	0.0564331	weakly similar to ( 144)AT1G09530| Symbols: PIF3, POC1, PAP3 | PAP3/PIF3/POC1 (PHYTOCHROME INTERACTING FACTOR 3); DNA binding / transcription factor/ transcription regulator | chr1:3077218-3079369 FORWARD no original description	MEIKNKGAAATSSNPPESILVDSSGECSKEPTMQCQQVVEQSKPDVNSLQPKSVEQNAVPSKQSEPASKESATKIDQTPNQVLGDSGTKGQTAAEKSMEPAVASSSVCSGTGADQGSDEPNQNLKRKTKDTDDSECHSEDVEEESAGAKKTAGGQGGAGSKRSRAAEVHNLSERRRRDRINEKMRALQELIPNCNKVDKASMLDEAIEYLKTLQLQVQIMSMGAGLYMPPMMLPAGMQHMHAPHMAPFSPMGVGMHMGYGMGYGMGMPDMNGGSSRFPMIQVPQMQGTHIPVAHMSGPTALHGMARSNPPGYGLPGQGYPMHMPPASVFPFSGGPLMNSPAQGLHARGSSGLVETVDSASASGLKDQMQNVDPQVKQSTGGCDSTSQMPTQCEAAAVGF…
Glyma20g22770	6.08	31	511	1.12557	0.838249	1.39519	0.129391	highly similar to ( 521)AT1G32415| Symbols: | pentatricopeptide (PPR) repeat-containing protein | chr1:11695591-11697876 FORWARDvery weakly similar to (95.9)RF1_ORYSA no original description	KNVECTSKNVVEARTLFNIMPHKNLVTYNAMLSAYLRSGMLDEASRFFNTMPERNVVSWTAMLNGFSDAERIEDAKKVFDELPERNIVLWNAMVVALVRNENLEEARMVFEETPYKNVVSWNAMIAGYVEKGRMDEARKLFEKMEFRNMVTWTSMISGYCREGNLEGAYCLFRAMPEKNVVSWTAMIGGFAWNGFYEKALLLFLEMLRVSDAKPNGETFVSLVYACGGLGFSCIGNWGIDDYDGRLRKGLVRMYSGFGLMDSAHNVFEANMKDCDDQCFNSMINGYVASTSMIAGYLSASQVLKSWNLCNDMSDRDYIAWIEMIYGYVQNELIAEAFCLFVEMMAHGVSPMSSTYVVLFGAMGSVAYLDQGIQLKIVYVYDLILENSLIAIYAKCGEID…
Glyma20g25110	6.64	17	257	2.77921	0.120814	1.16043	0.660767	moderately similar to ( 243)AT1G68320| Symbols: AtMYB62, BW62B, BW62C, MYB62 | MYB62 (myb domain protein 62); DNA binding / transcription factor | chr1:25607505-25608547 FORWARDweakly similar to ( 155)MYBA2_ORYSA no original description	ESELRRGPWTLEEDSLLIHYIARHGEGRWNMLAKSAGLKRTGKSCRLRWLNYLKPDIKRGNLTPQEQLLILELHSKWGNRWSKIAQHLPGRTDNEIKNYWRTRVQKQARQLNIESGSKRFIDAVKCFWMPRLLQKMEQSNSPSPQSSMTTMMNLGNSGEASMSSMSSSFNINPSMSSSSSPPQRKFIMDDANHFSTIYPIQDNCYLDTNNYGMEGINMDPLSAMDTYDFSQFDFQTAGNGWMLDSMGDSTLWNMDAM
Glyma20g27320	6.25	14	225	1.05175	0.754261	1.2532	0.631837	weakly similar to ( 160)AT5G60440| Symbols: | MADS-box protein (AGL62) | chr5:24323555-24324746 FORWARD no original description	MKKMSNESNLQVTFSKRRSGLFKKASELCTLCGADVALIVFSPGEKVFSFGHPNVDAVIDRYLERAPPTESFMEAHRMAHVRDLNAQLTQISNHLDAGRKRAEELNLMKKEAQAHLWWARPVDGMSMAQMKQFKAALEELKKQVARLADRAMLQSVTNPTHEFFPAAGVSSSSSSNSNSNPLSPQVFSPHLIQPPMLQNFMSMMPRHHGFNYMGMGGYGPAAGFF
Glyma20g29880	6.34	9	143	-1.21432	0.416276	1.05112	0.820006	weakly similar to ( 112)AT3G49000| Symbols: | RNA polymerase III subunit RPC82 family protein | chr3:18173888-18176831 FORWARD no original description	MILLMLHMCQNPMKEIAKIAASTLVEKKEASKLLYKLWKDNYLYMEKVGATAGAKQITILMWKVNKPLLWEYVLDEMYHAALNLSLRMAFEQEKDEELLKVPKDKLREPGPLQKKYKRLLNVRLLMGSSLLKLDDALMLFHDF
Glyma20g34630	6.19	6	98	-1.19683	0.728283	-1.15637	0.708898	weakly similar to ( 165)AT3G62840| Symbols: | similar to small nuclear ribonucleoprotein D2, putative / snRNP core protein D2, putative / Sm protein D2, putative [Arabidopsis thaliana] (TAIR:AT2G47640.3); similar to small nuclear ribonucleoprotein D2, putative / snRNP core protein D2, putative / Sm protein D2, putative [Arabidopsis thaliana] (TAIR:AT2G47640.2); similar to unknown [Picea sitchensi…	MSRPMEEDAAGKNEEEEFNTGPLSVLMMSVKNNTQLLGRVRAFDRHCNMVLENVREMWTEVPKTGKGKKKAQPVNKDRFISKMFLRGDSVIIVLRNPK
Glyma20g36730	7.89	12	153	3.06141	0.0417449	2.28594	0.128859	weakly similar to ( 144)AT2G27030| Symbols: CAM5 | CAM5 (CALMODULIN 5); calcium ion binding | chr2:11539797-11540138 FORWARDweakly similar to ( 142)CALM3_PETHY no original description	QLINMKEVLSEDLIVEFLEAFCLFDRDGDGCITMEELASALRTLNQNNPRKEELQIMMNEVDMNGSGTIEFGQFLNLMARKMKQSEAEEELKEAFKLFDKDQDGYISPTELLSAMRNIGVKITEEELEHMIRLADLDGDGRVNYEEFMRMMTV
Glyma20g37600	7.75	41	530	-1.77958	0.210268	-2.08342	0.0430207	weakly similar to ( 112)AT5G19090| Symbols: | heavy-metal-associated domain-containing protein | chr5:6387912-6389857 FORWARD no original description	MSKQDMMKSQNCLLKVNIHCDGCEQKVKKILQKIDGVYSVNIDAERGKVMVSGHVDPAKLIKKLKRSGKHAELWGGQRGMMYNQNYPTYPQFKNLHIDNTKGGSKDNKSQNHKGGAQKGGGQLAHFQSANGGSKVPPKNQKSVDFNLSEDELDESDFDEFDDDYDEFEDDFDEEDEEEEYGHGHGHGHGHGHGQQGHPMQHNKMMAMMAQMGNGRGPHGPGGMMNGPSMNGHKGNGGVKKGEVIDLPIQMKGKGGNFSFSEGKNEIKGNGDGGQKNKGGKQKGGDNNHNNGNKKKNSKGKNGGGFLVRFLGLGKKNKKGGGGGGSADTTTSKNKNNNKGKKDGGKFDKIDFDFQDFDIPPTKGKNGKGGSNGKNNNDKGHGSNNGNVGHHMGQMGPMGQ…
Glyma20g38420	6.19	6	98	1.0025	0.996749	-1.25796	0.423345	very weakly similar to (89.4)AT3G55240| Symbols: | Overexpression leads to PEL (Pseudo-Etiolation in Light) phenotype. | chr3:20484853-20485682 REVERSE no original description	MGDSSSSSCPASYIHMVQHLIEKCLIFHMTKEECMEALSKHANINPIITSTVWKELEKENKEFFEAYMKSKAKDDRMSQEETNQIIQKMISESDSSKR
